# Supplementary material for: Composition and Diversity of the Fecal Microbiome and Inferred Fecal Metagenome Does Not Predict Subsequent Pneumonia Caused by Rhodococcus equi in Foals
Source: PubMed Central journal article supplement (PMC4549325; doi:10.1371/journal.pone.0136586), 2015-08-25
Supplement: pone.0136586.s001.pdf [file pone.0136586.s001.pdf]

| Family                                                                                              | % Contribution | Cumulative % | Mean time 1 | Mean time 2 | Change in abundance with time |
|-----------------------------------------------------------------------------------------------------|----------------|--------------|-------------|-------------|-------------------------------|
| k__Bacteria;p__Firmicutes;c__Clostridia;o__Clostridiales;<br>f__Ruminococcaceae                     | 11.52          | 11.52        | 21.00%      | 22.70%      | 1.70%                         |
| k__Bacteria;p__Firmicutes;c__Clostridia;o__Clostridiales;<br>f__Lachnospiraceae                     | 10.63          | 22.15        | 18.40%      | 13.00%      | -5.40%                        |
| k__Bacteria;p__Firmicutes;c__Clostridia;o__Clostridiales;<br>f__                                    | 7.833          | 29.98        | 14.20%      | 15.50%      | 1.30%                         |
| k__Archaea;p__Euryarchaeota;c__Methanobacteria;o__Methanobacteriales;<br>f__Methanobacteriaceae     | 6.694          | 36.68        | 2.76%       | 7.18%       | 4.42%                         |
| k__Bacteria;p__Bacteroidetes;c__Bacteroidia;o__Bacteroidales;<br>f__                                | 6.124          | 42.8         | 1.55%       | 6.00%       | 4.45%                         |
| k__Bacteria;p__Firmicutes;c__Bacilli;o__Bacillales;<br>f__Planococcaceae                            | 5.518          | 48.32        | 3.32%       | 2.65%       | -0.67%                        |
| k__Bacteria;p__Firmicutes;c__Bacilli;o__Lactobacillales;<br>f__Lactobacillaceae                     | 4.825          | 53.15        | 4.98%       | 1.45%       | -3.53%                        |
| k__Bacteria;p__Proteobacteria;c__Gammaproteobacteria;o__Pseudomonadales;<br>f__Moraxellaceae        | 4.316          | 57.46        | 2.85%       | 1.32%       | -1.53%                        |
| k__Bacteria;p__Bacteroidetes;c__Bacteroidia;o__Bacteroidales;<br>f__Bacteroidaceae                  | 3.806          | 61.27        | 3.75%       | 1.59%       | -2.16%                        |
| k__Bacteria;p__Firmicutes;c__Clostridia;o__Clostridiales;<br>f__Christensenellaceae                 | 3.483          | 64.75        | 3.40%       | 2.71%       | -0.69%                        |
| k__Bacteria;p__Firmicutes;c__Clostridia;o__Clostridiales;<br>f__[Mogibacteriaceae]                  | 2.996          | 67.75        | 2.64%       | 4.11%       | 1.47%                         |
| k__Bacteria;p__Firmicutes;c__Clostridia;o__Clostridiales;<br>f__Clostridiaceae                      | 2.574          | 70.32        | 2.02%       | 3.31%       | 1.29%                         |
| k__Bacteria;p__Verrucomicrobia;c__Verrucomicrobiae;o__Verrucomicrobiales;<br>f__Verrucomicrobiaceae | 2.489          | 72.81        | 1.87%       | 1.55%       | -0.32%                        |
| k__Bacteria;p__Proteobacteria;c__Gammaproteobacteria;o__Enterobacteriales;<br>f__Enterobacteriaceae | 2.251          | 75.06        | 1.19%       | 1.16%       | -0.03%                        |
| k__Bacteria;p__Verrucomicrobia;c__Verrucomicrobiae;o__WCHB1-41;<br>f__RFP12                         | 2.06           | 77.12        | 0.46%       | 1.97%       | 1.51%                         |
| k__Bacteria;p__Spirochaetes;c__Spirochaetes;o__Spirochaetales;<br>f__Spirochaetaceae                | 1.877          | 79           | 0.40%       | 1.91%       | 1.51%                         |
| k__Bacteria;p__Firmicute                                                                            | 1.831          | 80.83        | 1.75%       | 0.87%       | -0.88%                        |

|                                                                                          |        |       |       |       |        |
|------------------------------------------------------------------------------------------|--------|-------|-------|-------|--------|
| s;c__Bacilli;o__Lactobacillales;f__Streptococcaceae                                      |        |       |       |       |        |
| k__Bacteria;p__Bacteroidetes;c__Bacteroidia;o__Bacteroidales;f__Parapre                  | 1.342  | 82.17 | 0.65% | 1.20% | 0.55%  |
| k__Bacteria;p__Bacteroidetes;c__Bacteroidia;o__Bacteroidales;f__BS11                     | 1.306  | 83.48 | 0.51% | 1.07% | 0.56%  |
| k__Bacteria;p__Firmicutes;c__Clostridia;o__Clostridiales;f__Veillonellaceae              | 1.298  | 84.77 | 1.24% | 0.74% | -0.50% |
| k__Bacteria;p__Firmicutes;c__Bacilli;o__Bacillales;f__Bacillaceae                        | 1.27   | 86.04 | 0.86% | 0.56% | -0.30% |
| k__Bacteria;p__Bacteroidetes;c__Bacteroidia;o__Bacteroidales;f__Porphyromonadaceae       | 0.9022 | 86.95 | 0.84% | 0.24% | -0.60% |
| k__Bacteria;p__Actinobacteria;c__Coriobacteriia;o__Coriobacteriales;f__Coriobacteriaceae | 0.8914 | 87.84 | 1.19% | 0.85% | -0.34% |
| k__Bacteria;p__Firmicutes;c__Bacilli;o__Lactobacillales;f__Carnobacteriaceae             | 0.7014 | 88.54 | 0.60% | 0.06% | -0.54% |
| k__Bacteria;p__Chlamydiae;c__Chlamydia;o__Chlamydiales;f__Chlamydiaceae                  | 0.6959 | 89.24 | 0.21% | 0.50% | 0.29%  |
| k__Bacteria;p__Firmicutes;c__Clostridia;o__Clostridiales;f__Dehalobacteriaceae           | 0.6345 | 89.87 | 0.52% | 0.63% | 0.12%  |
| k__Bacteria;p__Proteobacteria;c__Deltaproteobacteria;o__Desulfo                          | 0.6073 | 90.48 | 0.58% | 0.12% | -0.45% |
| k__Bacteria;p__WPS-2;c__o__;f__                                                          | 0.54   | 91.02 | 0.43% | 0.09% | -0.34% |
| k__Bacteria;p__Bacteroidetes;c__Bacteroidia;o__Bacteroidales;f__[Odoribacteraceae]       | 0.5115 | 91.53 | 0.46% | 0.09% | -0.37% |
| k__Bacteria;p__Actinobacteria;c__Actinobacteria;o__Actinomycetales;f__Micrococcaceae     | 0.5029 | 92.03 | 0.42% | 0.09% | -0.33% |
| k__Bacteria;p__Firmicutes;c__Clostridia;o__Clostridiales;Other                           | 0.4865 | 92.52 | 0.55% | 0.27% | -0.29% |
| k__Bacteria;p__Fusobacteria;c__Fusobacteriia;o__Fusobacteriales;f__Fusobacteriaceae      | 0.4355 | 92.95 | 0.31% | 0.21% | -0.10% |
| k__Bacteria;p__Bacteroidetes;c__Bacteroidia;o__Bacteroidales;f__S24-7                    | 0.4073 | 93.36 | 0.12% | 0.33% | 0.21%  |
| k__Bacteria;p__Firmicutes;c__Bacilli;o__Lactobacillales;f__Enterococcaceae               | 0.3939 | 93.75 | 0.22% | 0.19% | -0.03% |
| k__Bacteria;p__Firmicutes;c__Clostridia;o__Clostridiales;f__Eubacteriaceae               | 0.3889 | 94.14 | 0.15% | 0.36% | 0.22%  |
| k__Bacteria;p__Firmicutes;c__Clostridia;o__Clostri                                       | 0.2873 | 94.43 | 0.14% | 0.14% | 0.01%  |

|                                                                                                   |        |       |       |       |        |
|---------------------------------------------------------------------------------------------------|--------|-------|-------|-------|--------|
| diales;f__[Tissierellaceae]                                                                       |        |       |       |       |        |
| k__Bacteria;p__Firmicutes;c__Erysipelotrichi;o__Erysipelotrichales;f__Erysipelotrichaceae         | 0.2737 | 94.7  | 0.30% | 0.19% | -0.11% |
| k__Bacteria;p__Firmicutes;c__Bacilli;o__Lactobacillales;f__Leuconostocaceae                       | 0.2686 | 94.97 | 0.10% | 0.16% | 0.06%  |
| k__Bacteria;p__Bacteroidetes;c__Bacteroidia;o__Bacteroidales;f__Rikenellaceae                     | 0.2671 | 95.24 | 0.24% | 0.04% | -0.19% |
| Unassigned;Other;Other;Other;Other                                                                | 0.2656 | 95.51 | 0.23% | 0.33% | 0.10%  |
| k__Bacteria;p__Spirochaetes;c__MVP-15;o__PL-11B10;f__                                             | 0.2652 | 95.77 | 0.09% | 0.18% | 0.09%  |
| k__Bacteria;p__Proteobacteria;c__Epsilonproteobacteria;o__Campylobacterales;f__Campylobacteraceae | 0.2623 | 96.03 | 0.22% | 0.08% | -0.14% |
| k__Bacteria;p__Fibrobacteres;c__Fibrobacteria;o__Fibrobacterales;f__Fibrobacteraceae              | 0.2264 | 96.26 | 0.02% | 0.21% | 0.19%  |
| k__Bacteria;p__Proteobacteria;c__Betaproteobacteria;o__Tremblayales;f__                           | 0.2188 | 96.48 | 0.11% | 0.12% | 0.01%  |
| k__Bacteria;p__Firmicutes;c__Bacilli;o__Bacillales;f__Staphylococcaceae                           | 0.2187 | 96.7  | 0.20% | 0.01% | -0.19% |
| k__Bacteria;p__Tenericutes;c__Mollicutes;o__RF39;f__                                              | 0.2133 | 96.91 | 0.23% | 0.13% | -0.11% |
| k__Bacteria;p__Actinobacteria;c__Actinobacteria;o__Actinomycetales;f__Actinomycetaceae            | 0.2113 | 97.12 | 0.07% | 0.19% | 0.13%  |
| k__Bacteria;p__Firmicutes;c__Clostridia;o__Clostridiales;f__Peptostreptococcaceae                 | 0.1853 | 97.31 | 0.08% | 0.11% | 0.03%  |
| k__Bacteria;p__Armatimonadetes;c__SJA-176;o__RB046;f__                                            | 0.1843 | 97.49 | 0.08% | 0.15% | 0.08%  |
| k__Bacteria;p__Synergistetes;c__Synergistia;o__Synergistales;f__Synergistaceae                    | 0.1799 | 97.67 | 0.09% | 0.12% | 0.03%  |
| k__Archaea;p__Euryarchaeota;c__Methanomicrobia;o__Methanomicrobiales;f__Methanocorpusculaceae     | 0.1774 | 97.85 | 0.06% | 0.14% | 0.08%  |
| k__Bacteria;p__Bacteroidetes;c__Bacteroidia;o__Bacteroidales;f__Pre                               | 0.1415 | 97.99 | 0.07% | 0.11% | 0.04%  |
| k__Bacteria;p__Firmicutes;c__Clostridia;o__Clostridiales;f__Peptococcaceae                        | 0.1397 | 98.13 | 0.13% | 0.08% | -0.05% |

|                                                                                                  |         |       |       |       |        |
|--------------------------------------------------------------------------------------------------|---------|-------|-------|-------|--------|
| k__Bacteria;p__Bacteroidetes;c__Bacteroidia;o__Bacteroidales;f__RF16                             | 0.129   | 98.26 | 0.05% | 0.10% | 0.06%  |
| k__Bacteria;p__Proteobacteria;c__Alphaproteobacteria;o__RF32;f__                                 | 0.1204  | 98.38 | 0.10% | 0.03% | -0.07% |
| k__Bacteria;p__Firmicutes;c__Bacilli;o__Lactobacillales;Other                                    | 0.1127  | 98.49 | 0.07% | 0.05% | -0.01% |
| k__Bacteria;p__Proteobacteria;c__Alphaproteobacteria;o__f__                                      | 0.1101  | 98.6  | 0.10% | 0.01% | -0.08% |
| k__Bacteria;p__Proteobacteria;c__Epsilonproteobacteria;o__Campylobacterales;f__Helicobacteraceae | 0.1076  | 98.71 | 0.05% | 0.08% | 0.03%  |
| k__Bacteria;p__Planctomycetes;c__Planctomycetia;o__Pirellulales;f__Pirellulaceae                 | 0.09007 | 98.8  | 0.06% | 0.09% | 0.03%  |
| k__Bacteria;p__Tenericutes;c__RF3;o__ML615J-28;f__                                               | 0.08261 | 98.88 | 0.07% | 0.02% | -0.04% |
| k__Bacteria;p__Actinobacteria;c__Actinobacteria;o__Actinomycetales;f__Corynebacteriaceae         | 0.06411 | 98.95 | 0.06% | 0.01% | -0.04% |
