# Supplementary material for: Composition and Diversity of the Fecal Microbiome and Inferred Fecal Metagenome Does Not Predict Subsequent Pneumonia Caused by Rhodococcus equi in Foals
Source: PubMed Central journal article supplement (PMC4549325; doi:10.1371/journal.pone.0136586), 2015-08-25
Supplement: pone.0136586.s002.pdf [file pone.0136586.s002.pdf]

| OTU Number          | taxonomy                                                                                                                      | FDR corrected p-value | Time 1 mean | Time 2 mean |
|---------------------|-------------------------------------------------------------------------------------------------------------------------------|-----------------------|-------------|-------------|
| 330566              | k__Bacteria;p__Firmicutes;c__Clostridia;o__Clostridiales;f__Lachnospiraceae;g__Blautia;s__                                    | 1.88E-20              | 5.04E+01    | 2.39E+01    |
| New.ReferenceOTU350 | k__Bacteria;p__Firmicutes;c__Clostridia;o__Clostridiales;f__Ruminococcaceae;g__s__                                            | 1.88E-20              | 5.63E-02    | 1.98E+01    |
| 4396426             | k__Bacteria;p__Firmicutes;c__Clostridia;o__Clostridiales;f__Lachnospiraceae;g__s__                                            | 2.10E-20              | 4.50E+01    | 3.28E+01    |
| 295023              | k__Bacteria;p__Firmicutes;c__Clostridia;o__Clostridiales;f__Lachnospiraceae;g__Blautia;s__                                    | 2.96E-18              | 5.03E+01    | 1.06E+00    |
| 4472551             | k__Bacteria;p__Firmicutes;c__Clostridia;o__Clostridiales;f__Lachnospiraceae;g__Blautia;s__producta                            | 8.35E-18              | 5.46E+01    | 2.73E+00    |
| 326936              | k__Bacteria;p__Firmicutes;c__Clostridia;o__Clostridiales;f__Lachnospiraceae;g__Blautia;s__                                    | 3.96E-17              | 5.82E+01    | 1.34E+00    |
| 3185810             | k__Bacteria;p__Firmicutes;c__Clostridia;o__Clostridiales;f__g__s__                                                            | 3.96E-17              | 7.35E+01    | 2.79E+00    |
| 529180              | k__Bacteria;p__Firmicutes;c__Clostridia;o__Clostridiales;f__Lachnospiraceae;g__Coprococcus;s__                                | 7.67E-17              | 5.33E+01    | 5.99E+00    |
| 287744              | k__Bacteria;p__Firmicutes;c__Clostridia;o__Clostridiales;f__[Mogibacteriaceae];g__s__                                         | 8.56E-17              | 2.17E+01    | 1.60E+00    |
| 293330              | k__Bacteria;p__Firmicutes;c__Clostridia;o__Clostridiales;f__Lachnospiraceae;g__Blautia;s__                                    | 1.83E-16              | 1.12E+02    | 4.48E+00    |
| 182653              | k__Bacteria;p__Firmicutes;c__Clostridia;o__Clostridiales;f__Lachnospiraceae;g__Dorea;s__                                      | 2.95E-16              | 1.66E+01    | 4.93E+01    |
| 183487              | k__Bacteria;p__Firmicutes;c__Clostridia;o__Clostridiales;f__Lachnospiraceae;g__Blautia;s__producta                            | 4.31E-16              | 2.06E+01    | 1.19E+00    |
| 4412103             | k__Bacteria;p__Firmicutes;c__Clostridia;o__Clostridiales;f__Lachnospiraceae;g__Dorea;s__                                      | 4.74E-16              | 1.05E+01    | 8.21E+01    |
| 847728              | k__Bacteria;p__Firmicutes;c__Clostridia;o__Clostridiales;f__Ruminococcaceae;g__Ruminococcus;s__                               | 5.42E-16              | 3.42E+01    | 4.03E+01    |
| 4391326             | k__Bacteria;p__Firmicutes;c__Clostridia;o__Clostridiales;f__Lachnospiraceae;g__Dorea;s__                                      | 6.73E-16              | 1.96E+01    | 1.18E+00    |
| 111098              | k__Bacteria;p__Firmicutes;c__Clostridia;o__Clostridiales;f__Ruminococcaceae;g__s__                                            | 6.75E-16              | 3.13E+00    | 3.49E+01    |
| 301305              | k__Bacteria;p__Bacteroidetes;c__Bacteroidia;o__Bacteroidales;f__g__s__                                                        | 7.68E-16              | 1.41E-02    | 2.74E+01    |
| 4451907             | k__Bacteria;p__Firmicutes;c__Clostridia;o__Clostridiales;f__Lachnospiraceae                                                   | 1.13E-15              | 1.29E+01    | 8.51E+01    |
| 4453773             | k__Bacteria;p__Proteobacteria;c__Deltaproteobacteria;o__Desulfovibrionales;f__Desulfovibrionaceae;g__Desulfovibrio;s__        | 1.17E-15              | 4.18E+01    | 2.09E+00    |
| 4387469             | k__Bacteria;p__Firmicutes;c__Clostridia;o__Clostridiales;f__Ruminococcaceae;g__s__                                            | 1.36E-15              | 2.90E+01    | 1.19E+01    |
| 4443846             | k__Bacteria;p__Firmicutes;c__Clostridia;o__Clostridiales;f__Lachnospiraceae                                                   | 2.98E-15              | 3.26E+01    | 2.30E+00    |
| 4306262             | k__Bacteria;p__Verrucomicrobia;c__Verrucomicrobiae;o__Verrucomicrobiales;f__Verrucomicrobiaceae;g__Akkermansia;s__muciniphila | 2.98E-15              | 1.22E+02    | 4.20E+01    |
| 591439              | k__Bacteria;p__Firmicutes;c__Clostridia;o__Clostridiales;f__[Mogibacteriaceae];g__s__                                         | 4.30E-15              | 8.10E+00    | 1.94E+01    |
| 157772              | k__Bacteria;p__Firmicutes;c__Clostridia;o__Clostridiales;f__Ruminococcaceae;g__Oscillospira;s__                               | 4.30E-15              | 7.24E+00    | 8.96E+02    |
| 326476              | k__Bacteria;p__Firmicutes;c__Clostridia;o__Clostridiales;f__Lachnospiraceae;g__s__                                            | 6.35E-15              | 3.38E+01    | 1.84E+01    |
| 267605              | k__Bacteria;p__Firmicutes;c__Clostridia;o__Clostridiales;f__Lachnospiraceae;g__s__                                            | 7.69E-15              | 5.18E+00    | 5.22E+01    |
| 295127              | k__Bacteria;p__Spirochaetes;c__Spirochaetes;o__Spirochaetales;f__Spirochaetaceae;g__Treponema;s__                             | 8.11E-15              | 1.03E+00    | 2.27E+01    |
| 269509              | k__Bacteria;p__Firmicutes;c__Bacilli;o__Lactobacillales;f__Streptococcaceae;g__Streptococcus;s__minor                         | 1.06E-14              | 2.68E+01    | 1.57E+00    |
| New.ReferenceOTU878 | k__Bacteria;p__WPS-2;c__o__f__g__s__                                                                                          | 1.17E-14              | 4.44E+01    | 1.06E+00    |
| 801844              | k__Bacteria;p__Firmicutes;c__Clostridia;o__Clostridiales;f__g__s__                                                            | 1.48E-14              | 2.00E+00    | 3.21E+01    |
| New.ReferenceOTU5   | k__Bacteria;p__Firmicutes;c__Clostridia;o__Clostridiales;f__Lachnospiraceae;g__                                               | 1.59E-14              | 1.03E+      | 4.48E-      |

|                     |                                                                                                          |          |          |          |
|---------------------|----------------------------------------------------------------------------------------------------------|----------|----------|----------|
| 98                  | _Blautia;s__producta                                                                                     |          | 01       | 01       |
| 49406               | k__Bacteria;p__Firmicutes;c__Clostridia;o__Clostridiales;f__g__s__                                       | 2.08E-14 | 2.62E+01 | 1.28E+00 |
| 721569              | k__Bacteria;p__Firmicutes;c__Clostridia;o__Clostridiales;f__Ruminococcaceae;g__s__                       | 2.08E-14 | 1.81E+01 | 3.88E-01 |
| 4390863             | k__Bacteria;p__Firmicutes;c__Clostridia;o__Clostridiales;f__g__s__                                       | 2.08E-14 | 1.60E+01 | 9.70E-01 |
| 25695               | k__Bacteria;p__Firmicutes;c__Clostridia;o__Clostridiales;f__Clostridiaceae;g__Clostridium;s__            | 2.54E-14 | 1.45E+01 | 4.18E-01 |
| 4455257             | k__Bacteria;p__Fusobacteria;c__Fusobacteriia;o__Fusobacteriales;f__Fusobacteriaceae;g__Fusobacterium;s__ | 3.34E-14 | 9.82E+00 | 2.39E-01 |
| 4450214             | k__Bacteria;p__Firmicutes;c__Clostridia;o__Clostridiales;f__Ruminococcaceae;g__s__                       | 4.76E-14 | 3.26E+01 | 1.15E+00 |
| New.ReferenceOTU904 | k__Bacteria;p__Firmicutes;c__Clostridia;o__Clostridiales;f__Lachnospiraceae;g__s__                       | 8.41E-14 | 3.28E+00 | 2.81E+01 |
| 4404405             | k__Bacteria;p__Firmicutes;c__Bacilli;o__Lactobacillales;f__Carnobacteriaceae;g__Desemzia;s__             | 1.22E-13 | 4.16E+01 | 3.51E+00 |
| 323903              | k__Bacteria;p__Firmicutes;c__Clostridia;o__Clostridiales;f__Ruminococcaceae;g__s__                       | 1.24E-13 | 1.52E+00 | 1.73E+01 |
| 145009              | k__Bacteria;p__Firmicutes;c__Bacilli;o__Lactobacillales;f__Streptococcaceae;g__Streptococcus;s__         | 1.65E-13 | 1.65E+00 | 2.05E+01 |
| 330252              | k__Bacteria;p__Firmicutes;c__Clostridia;o__Clostridiales;f__Ruminococcaceae;g__s__                       | 2.73E-13 | 7.18E-01 | 9.16E+00 |
| 317004              | k__Bacteria;p__Firmicutes;c__Clostridia;o__Clostridiales;f__g__s__                                       | 3.15E-13 | 1.84E+01 | 1.02E+02 |
| 258613              | k__Bacteria;p__Firmicutes;c__Clostridia;o__Clostridiales;f__g__s__                                       | 3.47E-13 | 5.23E+00 | 3.47E+01 |
| 312227              | k__Bacteria;p__Bacteroidetes;c__Bacteroidia;o__Bacteroidales;f__g__s__                                   | 3.53E-13 | 9.58E-01 | 1.06E+01 |
| 4459388             | k__Bacteria;p__Firmicutes;c__Clostridia;o__Clostridiales;f__Lachnospiraceae;g__s__                       | 3.54E-13 | 1.22E+01 | 2.39E-01 |
| 314825              | k__Bacteria;p__Bacteroidetes;c__Bacteroidia;o__Bacteroidales;f__g__s__                                   | 3.71E-13 | 1.07E+00 | 2.53E+01 |
| 538947              | k__Bacteria;p__Firmicutes;c__Clostridia;o__Clostridiales;f__Lachnospiraceae;g__s__                       | 4.09E-13 | 8.61E+01 | 1.93E+01 |
| 1129180             | k__Bacteria;p__Firmicutes;c__Clostridia;o__Clostridiales;f__g__s__                                       | 4.30E-13 | 6.76E-01 | 9.24E+00 |
| 4303852             | k__Bacteria;p__Firmicutes;c__Clostridia;o__Clostridiales;f__Ruminococcaceae;g__s__                       | 4.51E-13 | 1.03E+00 | 1.07E+01 |
| 292062              | k__Bacteria;p__Firmicutes;c__Clostridia;o__Clostridiales;f__Ruminococcaceae;g__s__                       | 4.51E-13 | 2.39E+00 | 1.47E+01 |
| 313495              | k__Bacteria;p__Firmicutes;c__Clostridia;o__Clostridiales;f__Lachnospiraceae;g__Coprococcus;s__           | 5.02E-13 | 4.35E+01 | 6.16E+00 |
| 663226              | k__Bacteria;p__Firmicutes;c__Clostridia;o__Clostridiales;f__Veillonellaceae;g__Anaerovibrio;s__          | 5.65E-13 | 3.09E+01 | 5.82E-01 |
| 319512              | k__Bacteria;p__Firmicutes;c__Clostridia;o__Clostridiales;f__Ruminococcaceae;g__s__                       | 6.11E-13 | 1.96E+00 | 1.03E+01 |
| 296644              | k__Bacteria;p__Bacteroidetes;c__Bacteroidia;o__Bacteroidales;f__g__s__                                   | 6.77E-13 | 1.12E+01 | 8.51E+01 |
| 273272              | k__Bacteria;p__Firmicutes;c__Clostridia;o__Clostridiales;f__g__s__                                       | 7.33E-13 | 5.92E-01 | 1.27E+01 |
| New.ReferenceOTU765 | k__Bacteria;p__Bacteroidetes;c__Bacteroidia;o__Bacteroidales;f__g__s__                                   | 7.45E-13 | 1.13E-01 | 9.61E+00 |
| 563764              | k__Bacteria;p__Firmicutes;c__Bacilli;o__Bacillales;f__Planococcaceae;g__s__                              | 7.99E-13 | 4.61E+01 | 4.57E+00 |
| 296811              | k__Bacteria;p__Verrucomicrobia;c__Verruco-5;o__WCHB1-41;f__RFP12;g__s__                                  | 8.65E-13 | 2.06E+00 | 1.07E+01 |
| 166515              | k__Bacteria;p__Firmicutes;c__Clostridia;o__Clostridiales;f__Ruminococcaceae;g__s__                       | 9.17E-13 | 1.02E+01 | 0.00E+00 |
| 207816              | k__Bacteria;p__Firmicutes;c__Clostridia;o__Clostridiales;f__Ruminococcaceae;g__s__                       | 9.51E-13 | 8.45E-01 | 1.09E+01 |
| 4364464             | k__Bacteria;p__Firmicutes;c__Clostridia;o__Clostridiales;f__Lachnospiraceae;g__[Ruminococcus]            | 9.51E-13 | 1.21E+01 | 8.51E-01 |

|                     |                                                                                                              |          |          |          |
|---------------------|--------------------------------------------------------------------------------------------------------------|----------|----------|----------|
| 441934              | k_Bacteria;p_Firmicutes;c_Clostridia;o_Clostridiales;f_g_s                                                   | 1.02E-12 | 2.18E+00 | 1.31E+01 |
| 302906              | k_Bacteria;p_Fibrobacteres;c_Fibrobacteria;o_Fibrobacterales;f_Fibrobacteraceae;g_Fibrobacter;s_succinogenes | 1.64E-12 | 8.59E-01 | 1.52E+01 |
| 1132942             | k_Bacteria;p_Firmicutes;c_Clostridia;o_Clostridiales;f_Ruminococcaceae;g_s                                   | 1.67E-12 | 6.38E+00 | 1.04E+01 |
| 312156              | k_Bacteria;p_Firmicutes;c_Clostridia;o_Clostridiales;f_g_s                                                   | 1.85E-12 | 6.51E+00 | 1.64E+01 |
| 330992              | k_Bacteria;p_Firmicutes;c_Clostridia;o_Clostridiales;f_Lachnospiraceae;g_s                                   | 1.85E-12 | 4.61E+00 | 4.87E+01 |
| New.ReferenceOTU189 | k_Bacteria;p_Bacteroidetes;c_Bacteroidia;o_Bacteroidales;f_S24-7;g_s                                         | 2.39E-12 | 0.00E+00 | 1.19E+01 |
| 4402903             | k_Bacteria;p_Firmicutes;c_Clostridia;o_Clostridiales;f_Christensenellaceae;g_s                               | 2.57E-12 | 5.23E+01 | 7.16E+00 |
| 174147              | k_Bacteria;p_Firmicutes;c_Clostridia;o_Clostridiales;f_Ruminococcaceae;g_Ruminococcus;s                      | 2.60E-12 | 1.28E+01 | 1.49E+02 |
| 4331360             | k_Bacteria;p_Firmicutes;c_Clostridia;o_Clostridiales;f_Lachnospiraceae;g_s                                   | 2.60E-12 | 9.32E+00 | 3.43E+01 |
| 335789              | k_Bacteria;p_Firmicutes;c_Clostridia;o_Clostridiales;f_Lachnospiraceae;g_Blautia;s                           | 2.63E-12 | 3.69E+00 | 1.49E+02 |
| 661758              | k_Bacteria;p_Spirochaetes;c_Spirochaetes;o_Spirochaetales;f_Spirochaetaceae;g_Treponema;s                    | 2.65E-12 | 8.76E+00 | 5.40E+01 |
| New.ReferenceOTU461 | k_Bacteria;p_Firmicutes;c_Clostridia;o_Clostridiales;f_g_s                                                   | 2.65E-12 | 6.54E+00 | 2.94E+01 |
| 339121              | k_Bacteria;p_Firmicutes;c_Clostridia;o_Clostridiales;f_Ruminococcaceae;g_s                                   | 2.65E-12 | 1.14E+01 | 4.47E+01 |
| 109593              | k_Bacteria;p_Firmicutes;c_Clostridia;o_Clostridiales;f_Lachnospiraceae;g_s                                   | 3.05E-12 | 9.15E-01 | 8.27E+00 |
| 97263               | k_Bacteria;p_Firmicutes;c_Clostridia;o_Clostridiales;f_Ruminococcaceae;g_s                                   | 3.21E-12 | 1.05E+01 | 1.04E+01 |
| 337606              | k_Bacteria;p_Bacteroidetes;c_Bacteroidia;o_Bacteroidales;f_Bacteroidaceae;g_BF311;s                          | 3.28E-12 | 1.17E+00 | 1.12E+01 |
| 4472174             | k_Bacteria;p_Firmicutes;c_Clostridia;o_Clostridiales;f_Lachnospiraceae;g_[Ruminococcus];s                    | 3.54E-12 | 2.09E+01 | 1.43E+00 |
| 291938              | k_Bacteria;p_Firmicutes;c_Clostridia;o_Clostridiales;f_Lachnospiraceae;g_s                                   | 5.62E-12 | 4.44E+01 | 1.41E+02 |
| 354566              | k_Bacteria;p_Bacteroidetes;c_Bacteroidia;o_Bacteroidales;f_g_s                                               | 7.31E-12 | 1.45E+00 | 1.57E+01 |
| 196462              | k_Bacteria;p_Firmicutes;c_Clostridia;o_Clostridiales                                                         | 7.59E-12 | 2.85E+01 | 3.24E+00 |
| 673084              | k_Bacteria;p_Firmicutes;c_Clostridia;o_Clostridiales;f_[Mogibacteriaceae];g_s                                | 7.94E-12 | 1.10E+01 | 1.19E+00 |
| 338757              | k_Bacteria;p_Firmicutes;c_Bacilli;o_Lactobacillales;f_Lactobacillaceae;g_Lactobacillus;s_mucosae             | 8.78E-12 | 2.70E+01 | 6.21E+00 |
| 4437746             | k_Bacteria;p_Firmicutes;c_Clostridia;o_Clostridiales;f_g_s                                                   | 1.04E-11 | 4.51E+00 | 8.96E+02 |
| 184497              | k_Bacteria;p_Firmicutes;c_Clostridia;o_Clostridiales;f_g_s                                                   | 1.04E-11 | 6.86E+00 | 3.13E+01 |
| 350041              | k_Bacteria;p_Firmicutes;c_Clostridia;o_Clostridiales;f_Lachnospiraceae;g_s                                   | 1.08E-11 | 8.93E+00 | 3.53E+01 |
| 1077751             | k_Bacteria;p_Firmicutes;c_Clostridia;o_Clostridiales;f_g_s                                                   | 1.16E-11 | 8.07E+00 | 2.53E+01 |
| 607825              | k_Bacteria;p_Firmicutes;c_Clostridia;o_Clostridiales;f_g_s                                                   | 1.26E-11 | 1.27E+00 | 9.75E+00 |
| 297662              | k_Bacteria;p_Firmicutes;c_Clostridia;o_Clostridiales;f_g_s                                                   | 1.26E-11 | 6.70E+00 | 2.84E+01 |
| 303299              | k_Bacteria;p_Bacteroidetes;c_Bacteroidia;o_Bacteroidales;f_g_s                                               | 1.33E-11 | 1.34E+00 | 1.31E+01 |
| 314680              | k_Bacteria;p_Firmicutes;c_Clostridia;o_Clostridiales;f_[Mogibacteriaceae];g_s                                | 1.40E-11 | 2.15E+00 | 9.76E+00 |
| 345763              | k_Bacteria;p_Firmicutes;c_Clostridia;o_Clostridiales;f_Ruminococcaceae;g_s                                   | 1.40E-11 | 1.47E+01 | 1.82E+00 |
| 268220              | k_Bacteria;p_Firmicutes;c_Clostridia;o_Clostridiales;f_g_s                                                   | 1.48E-11 | 9.25E+00 | 2.24E+01 |

|                     |                                                                                                       |          |          |          |
|---------------------|-------------------------------------------------------------------------------------------------------|----------|----------|----------|
| 300401              | k__Bacteria;p__Firmicutes;c__Clostridia;o__Clostridiales;f__g__s__                                    | 2.90E-11 | 7.44E+00 | 2.46E+01 |
| 1107755             | k__Bacteria;p__Firmicutes;c__Clostridia;o__Clostridiales;f__g__s__                                    | 3.65E-11 | 4.87E+00 | 3.73E+01 |
| 185570              | k__Bacteria;p__Firmicutes;c__Clostridia;o__Clostridiales;f__Lachnospiraceae;g__Ruminococcus;s__gnavus | 4.34E-11 | 1.20E+01 | 1.15E+00 |
| 359984              | k__Bacteria;p__Firmicutes;c__Clostridia;o__Clostridiales;f__Ruminococcaceae;g__s__                    | 4.87E-11 | 2.02E+01 | 2.15E+00 |
| 533847              | k__Bacteria;p__Firmicutes;c__Clostridia;o__Clostridiales;f__Ruminococcaceae;g__Oscillospira;s__       | 5.27E-11 | 5.46E+00 | 0.00E+00 |
| 230232              | k__Bacteria;p__Firmicutes;c__Clostridia;o__Clostridiales;f__Lachnospiraceae;g__Dorea;s__              | 6.58E-11 | 2.92E+01 | 6.07E+00 |
| 298659              | k__Bacteria;p__Firmicutes;c__Clostridia;o__Clostridiales;f__g__s__                                    | 6.63E-11 | 1.89E+01 | 5.88E+01 |
| 4404401             | k__Bacteria;p__Firmicutes;c__Bacilli;o__Bacillales;f__Staphylococcaceae;g__Jeo tgalicoccus;s__        | 6.92E-11 | 7.32E+00 | 4.48E+02 |
| 305056              | k__Bacteria;p__Firmicutes;c__Clostridia;o__Clostridiales;f__Ruminococcaceae;g__Ruminococcus;s__       | 6.99E-11 | 8.59E+01 | 1.39E+01 |
| 291085              | k__Bacteria;p__Verrucomicrobia;c__Verruco-5;o__WCHB1-41;f__RFP12;g__s__                               | 7.34E-11 | 5.10E+00 | 2.43E+01 |
| 4435400             | k__Bacteria;p__Firmicutes;c__Clostridia;o__Clostridiales;f__Lachnospiraceae                           | 8.03E-11 | 6.62E+00 | 1.09E+00 |
| 355930              | k__Bacteria;p__Bacteroidetes;c__Bacteroidia;o__Bacteroidales;f__g__s__                                | 9.62E-11 | 1.40E+01 | 6.28E+01 |
| New.ReferenceOTU923 | k__Bacteria;p__Firmicutes;c__Clostridia;o__Clostridiales;f__g__s__                                    | 1.01E-10 | 9.06E+00 | 8.96E+02 |
| 290762              | k__Bacteria;p__Firmicutes;c__Clostridia;o__Clostridiales;f__Lachnospiraceae;g__Coprococcus;s__        | 1.34E-10 | 9.06E+00 | 1.04E+00 |
| 174033              | k__Bacteria;p__Firmicutes;c__Clostridia;o__Clostridiales;f__g__s__                                    | 1.37E-10 | 2.00E+00 | 1.19E+01 |
| 295539              | k__Bacteria;p__Firmicutes;c__Clostridia;o__Clostridiales;f__Lachnospiraceae;g__s__                    | 1.41E-10 | 1.52E+00 | 1.50E+01 |
| 191458              | k__Bacteria;p__Firmicutes;c__Bacilli;o__Lactobacillales;f__Streptococcaceae;g__Streptococcus;s__      | 1.45E-10 | 1.56E+01 | 6.42E+01 |
| 188348              | k__Bacteria;p__Firmicutes;c__Clostridia;o__Clostridiales;f__Ruminococcaceae;g__s__                    | 1.54E-10 | 5.28E+00 | 8.96E+02 |
| 288583              | k__Bacteria;p__Firmicutes;c__Clostridia;o__Clostridiales;f__Ruminococcaceae;g__s__                    | 1.54E-10 | 5.63E+01 | 7.87E+00 |
| 4473883             | k__Bacteria;p__Firmicutes;c__Bacilli;o__Lactobacillales;f__Streptococcaceae;g__Streptococcus;s__      | 1.69E-10 | 1.96E+01 | 3.21E+00 |
| 303269              | k__Bacteria;p__Firmicutes;c__Clostridia;o__Clostridiales;f__g__s__                                    | 1.72E-10 | 7.90E+00 | 4.18E+01 |
| 739387              | k__Bacteria;p__Firmicutes;c__Clostridia;o__Clostridiales;f__g__s__                                    | 2.03E-10 | 1.63E+01 | 7.61E+01 |
| 294205              | k__Bacteria;p__Verrucomicrobia;c__Verruco-5;o__WCHB1-41;f__RFP12;g__s__                               | 2.03E-10 | 6.93E+00 | 2.61E+01 |
| 292150              | k__Bacteria;p__Bacteroidetes;c__Bacteroidia;o__Bacteroidales;f__g__s__                                | 2.07E-10 | 1.83E+01 | 7.37E+00 |
| 4408801             | k__Bacteria;p__Firmicutes;c__Clostridia;o__Clostridiales;f__Ruminococcaceae;g__Oscillospira;s__       | 2.10E-10 | 7.39E+00 | 1.19E+01 |
| 352840              | k__Bacteria;p__Firmicutes;c__Clostridia;o__Clostridiales;f__Lachnospiraceae;g__s__                    | 2.11E-10 | 2.68E+00 | 2.68E+01 |
| 287578              | k__Bacteria;p__Verrucomicrobia;c__Verruco-5;o__WCHB1-41;f__RFP12;g__s__                               | 2.11E-10 | 2.30E+00 | 1.22E+01 |
| 187338              | k__Bacteria;p__Firmicutes;c__Clostridia;o__Clostridiales;f__Lachnospiraceae;g__Dorea;s__              | 2.18E-10 | 3.41E+00 | 2.09E+01 |
| 324511              | k__Bacteria;p__Spirochaetes;c__Spirochaetes;o__Spirochaetales;f__Spirochaetaceae;g__Treponema;s__     | 2.18E-10 | 1.99E+00 | 1.28E+01 |
| 851733              | k__Bacteria;p__Firmicutes;c__Bacilli;o__Lactobacillales;f__Lactobacillaceae;g__Lactobacillus;s__      | 2.18E-10 | 1.92E+02 | 3.00E+01 |
| 298695              | k__Bacteria;p__Firmicutes;c__Clostridia;o__Clostridiales;f__Ruminococcaceae;g__s__                    | 2.24E-10 | 2.39E+01 | 5.58E+00 |
| 185802              | k__Bacteria;p__Firmicutes;c__Clostridia;o__Clostridiales;f__Ruminococcaceae;g__s__                    | 2.70E-10 | 3.54E+01 | 1.00E+01 |

|                     |                                                                                                            |          |          |          |
|---------------------|------------------------------------------------------------------------------------------------------------|----------|----------|----------|
| 109491              | k__Bacteria;p__Firmicutes;c__Clostridia;o__Clostridiales;f__Ruminococcaceae;g__s__                         | 3.08E-10 | 5.51E+01 | 1.89E+02 |
| 1105016             | k__Bacteria;p__Firmicutes;c__Clostridia;o__Clostridiales;f__Ruminococcaceae;g__s__                         | 3.31E-10 | 1.15E+01 | 1.33E+00 |
| 293210              | k__Bacteria;p__Bacteroidetes;c__Bacteroidia;o__Bacteroidales;f__[Paraprevotellaceae];g__s__                | 3.31E-10 | 1.13E+01 | 4.20E+01 |
| New.ReferenceOTU841 | k__Bacteria;p__Firmicutes;c__Clostridia;o__Clostridiales;f__g__s__                                         | 3.56E-10 | 9.30E-01 | 4.76E+00 |
| 184534              | k__Bacteria;p__Firmicutes;c__Clostridia;o__Clostridiales;f__Christensenellaceae;g__s__                     | 3.73E-10 | 4.57E+01 | 4.85E+00 |
| 292738              | k__Bacteria;p__Bacteroidetes;c__Bacteroidia;o__Bacteroidales;f__BS11;g__s__                                | 3.73E-10 | 6.55E+00 | 3.13E+01 |
| New.ReferenceOTU154 | k__Bacteria;p__Firmicutes;c__Clostridia;o__Clostridiales;f__g__s__                                         | 3.73E-10 | 5.92E+00 | 1.06E+00 |
| 338781              | k__Bacteria;p__Firmicutes;c__Clostridia;o__Clostridiales;f__Ruminococcaceae;g__s__                         | 3.73E-10 | 7.55E+00 | 2.76E+01 |
| 4439469             | k__Bacteria;p__Firmicutes;c__Clostridia;o__Clostridiales;f__Ruminococcaceae;g__s__                         | 3.73E-10 | 1.43E+01 | 2.33E+00 |
| New.ReferenceOTU639 | k__Bacteria;p__Chlamydiae;c__Chlamydia;o__Chlamydiales;f__Chlamydiaceae;g__s__                             | 3.77E-10 | 3.75E+00 | 3.92E+01 |
| 155884              | k__Bacteria;p__Firmicutes;c__Clostridia;o__Clostridiales;f__Ruminococcaceae;g__Ruminococcus;s__            | 4.35E-10 | 2.54E-01 | 3.96E+00 |
| 672440              | k__Bacteria;p__Firmicutes;c__Clostridia;o__Clostridiales;f__g__s__                                         | 4.40E-10 | 3.85E+00 | 1.85E+01 |
| 253380              | k__Bacteria;p__Firmicutes;c__Clostridia;o__Clostridiales;f__Lachnospiraceae;g__Dorea;s__                   | 4.43E-10 | 6.40E+01 | 1.27E+01 |
| 4299396             | k__Bacteria;p__Firmicutes;c__Clostridia;o__Clostridiales;f__Ruminococcaceae;g__s__                         | 4.43E-10 | 1.61E+01 | 5.22E+01 |
| 170462              | k__Bacteria;p__Firmicutes;c__Clostridia;o__Clostridiales;f__Lachnospiraceae;g__[Ruminococcus];s__          | 4.61E-10 | 4.70E+00 | 0.00E+00 |
| New.ReferenceOTU689 | k__Bacteria;p__Firmicutes;c__Clostridia;o__Clostridiales;f__g__s__                                         | 4.86E-10 | 2.82E+00 | 1.16E+01 |
| 3327894             | k__Bacteria;p__Bacteroidetes;c__Bacteroidia;o__Bacteroidales;f__Bacteroidaceae;g__Bacteroides;s__uniformis | 5.15E-10 | 8.55E+00 | 4.03E-01 |
| 109634              | k__Bacteria;p__Firmicutes;c__Clostridia;o__Clostridiales;f__[Mogibacteriaceae];g__Mogibacterium;s__        | 5.78E-10 | 8.13E+00 | 4.24E+01 |
| 251970              | k__Bacteria;p__Firmicutes;c__Clostridia;o__Clostridiales;f__Ruminococcaceae;g__s__                         | 6.52E-10 | 1.08E+01 | 3.31E+01 |
| 465433              | k__Bacteria;p__Bacteroidetes;c__Bacteroidia;o__Bacteroidales;f__Rikenellaceae;g__s__                       | 6.70E-10 | 6.75E+00 | 2.39E-01 |
| 85903               | k__Bacteria;p__Firmicutes;c__Clostridia;o__Clostridiales;f__Ruminococcaceae;g__s__                         | 6.70E-10 | 9.04E+00 | 1.70E+00 |
| 270676              | k__Bacteria;p__Firmicutes;c__Clostridia;o__Clostridiales;f__Lachnospiraceae;g__s__                         | 6.78E-10 | 4.23E+00 | 1.84E+01 |
| 258389              | k__Bacteria;p__Firmicutes;c__Clostridia;o__Clostridiales;f__Ruminococcaceae;g__s__                         | 6.92E-10 | 4.61E+00 | 1.93E+01 |
| New.ReferenceOTU738 | k__Bacteria;p__Verrucomicrobia;c__Verruco-5;o__WCHB1-41;f__RFP12;g__s__                                    | 7.05E-10 | 9.72E-01 | 4.82E+00 |
| 294182              | k__Bacteria;p__Bacteroidetes;c__Bacteroidia;o__Bacteroidales;f__g__s__                                     | 7.05E-10 | 2.68E-01 | 6.54E+00 |
| 289474              | k__Bacteria;p__Firmicutes;c__Clostridia;o__Clostridiales;f__Ruminococcaceae;g__s__                         | 7.05E-10 | 1.97E-01 | 3.34E+00 |
| 458550              | k__Bacteria;p__Firmicutes;c__Clostridia;o__Clostridiales;f__g__s__                                         | 8.44E-10 | 3.94E-01 | 5.84E+00 |
| 298279              | k__Bacteria;p__Firmicutes;c__Clostridia;o__Clostridiales;f__g__s__                                         | 8.63E-10 | 7.46E-01 | 4.13E+00 |
| New.ReferenceOTU38  | k__Bacteria;p__Firmicutes;c__Clostridia;o__Clostridiales;f__Ruminococcaceae;g__s__                         | 1.12E-09 | 5.21E-01 | 4.85E+00 |
| New.ReferenceOTU246 | k__Bacteria;p__Firmicutes;c__Clostridia;o__Clostridiales;f__g__s__                                         | 1.14E-09 | 6.15E+00 | 1.49E+01 |
| New.ReferenceOTU102 | k__Bacteria;p__Firmicutes;c__Clostridia;o__Clostridiales;f__Christensenellaceae;g__s__                     | 1.14E-09 | 1.41E-01 | 2.57E+00 |
| New.ReferenceOTU556 | k__Bacteria;p__Firmicutes;c__Clostridia;o__Clostridiales;f__g__s__                                         | 1.19E-09 | 2.06E+00 | 7.49E+00 |

|                     |                                                                                                                       |          |          |          |
|---------------------|-----------------------------------------------------------------------------------------------------------------------|----------|----------|----------|
| 4441855             | k__Bacteria;p__Firmicutes;c__Bacilli;o__Lactobacillales;f__Streptococcaceae;g__Streptococcus;s__                      | 1.25E-09 | 8.83E+00 | 1.25E+00 |
| 589903              | k__Bacteria;p__Firmicutes;c__Clostridia;o__Clostridiales;f__g__s__                                                    | 1.25E-09 | 1.41E+02 | 5.57E+00 |
| 4446740             | k__Bacteria;p__Firmicutes;c__Clostridia;o__Clostridiales;f__Ruminococcaceae;g__s__                                    | 1.34E-09 | 1.62E+01 | 5.58E+01 |
| 262024              | k__Bacteria;p__Firmicutes;c__Clostridia;o__Clostridiales;f__Ruminococcaceae                                           | 1.40E-09 | 1.04E+00 | 4.28E+00 |
| 110492              | k__Bacteria;p__Firmicutes;c__Clostridia;o__Clostridiales;f__g__s__                                                    | 1.43E-09 | 2.94E+01 | 8.59E+01 |
| 4476773             | k__Bacteria;p__Firmicutes;c__Clostridia;o__Clostridiales;f__g__s__                                                    | 1.45E-09 | 2.52E+01 | 4.99E+00 |
| New.ReferenceOTU516 | k__Bacteria;p__Spirochaetes;c__Spirochaetes;o__Spirochaetales;f__Spirochaetaceae;g__Treponema;s__                     | 1.65E-09 | 6.62E+01 | 5.48E+00 |
| 236487              | k__Bacteria;p__Bacteroidetes;c__Bacteroidia;o__Bacteroidales;f__S24-7;g__s__                                          | 1.74E-09 | 0.00E+00 | 6.96E+00 |
| 104130              | k__Archaea;p__Euryarchaeota;c__Methanobacteria;o__Methanobacteriales;f__Methanobacteriaceae;g__Methanobrevibacter;s__ | 1.74E-09 | 3.94E+01 | 3.06E+00 |
| 166689              | k__Bacteria;p__Firmicutes;c__Clostridia;o__Clostridiales;f__Ruminococcaceae;g__s__                                    | 1.75E-09 | 2.55E+00 | 5.97E+02 |
| 298621              | k__Bacteria;p__Firmicutes;c__Clostridia;o__Clostridiales;f__Veillonellaceae;g__s__                                    | 1.75E-09 | 1.15E+00 | 1.14E+01 |
| 350523              | k__Bacteria;p__Firmicutes;c__Clostridia;o__Clostridiales;f__Lachnospiraceae;g__s__                                    | 2.18E-09 | 4.76E+00 | 1.64E+01 |
| 54563               | k__Bacteria;p__Firmicutes;c__Clostridia;o__Clostridiales;f__Lachnospiraceae;g__[Ruminococcus];s__gnavus               | 2.30E-09 | 1.19E+01 | 1.60E+00 |
| 182044              | k__Bacteria;p__Firmicutes;c__Clostridia;o__Clostridiales;f__Ruminococcaceae;g__s__                                    | 2.38E-09 | 4.39E+00 | 5.97E+01 |
| 353696              | k__Bacteria;p__Firmicutes;c__Clostridia;o__Clostridiales;f__Christensenellaceae;g__s__                                | 2.47E-09 | 7.62E+00 | 5.21E+00 |
| 295822              | k__Bacteria;p__Verrucomicrobia;c__Verruco-5;o__WCHB1-41;f__RFP12;g__s__                                               | 2.71E-09 | 2.42E+00 | 1.11E+01 |
| 301719              | k__Bacteria;p__Verrucomicrobia;c__Verruco-5;o__WCHB1-41;f__RFP12;g__s__                                               | 2.79E-09 | 9.44E+01 | 4.10E+00 |
| 4451049             | k__Bacteria;p__Firmicutes;c__Clostridia;o__Clostridiales;f__Christensenellaceae;g__s__                                | 2.85E-09 | 2.14E+01 | 1.12E+00 |
| 350502              | k__Bacteria;p__Firmicutes;c__Clostridia;o__Clostridiales;f__Ruminococcaceae;g__s__                                    | 3.09E-09 | 4.39E+00 | 1.45E+01 |
| 111019              | k__Bacteria;p__Firmicutes;c__Clostridia;o__Clostridiales;f__Ruminococcaceae;g__s__                                    | 3.16E-09 | 4.46E+00 | 1.94E+01 |
| 187470              | k__Bacteria;p__Firmicutes;c__Clostridia;o__Clostridiales;f__Lachnospiraceae;g__Dorea;s__                              | 3.82E-09 | 6.90E+00 | 1.18E+00 |
| 4465124             | k__Bacteria;p__Firmicutes;c__Clostridia;o__Clostridiales;f__Ruminococcaceae;g__s__                                    | 4.50E-09 | 3.27E+01 | 2.22E+00 |
| 237444              | k__Bacteria;p__Firmicutes;c__Bacilli;o__Lactobacillales;f__Streptococcaceae;g__Streptococcus;s__                      | 4.70E-09 | 2.19E+01 | 3.58E+00 |
| 4315471             | k__Bacteria;p__Firmicutes;c__Clostridia;o__Clostridiales;f__Ruminococcaceae;g__Ruminococcus;s__                       | 4.70E-09 | 3.42E+00 | 2.23E+01 |
| 110136              | k__Bacteria;p__Firmicutes;c__Clostridia;o__Clostridiales;f__Dehalobacteriaceae;g__Dehalobacterium;s__                 | 4.70E-09 | 6.48E+01 | 4.10E+00 |
| 25005               | k__Bacteria;p__Firmicutes;c__Clostridia;o__Clostridiales;f__Lachnospiraceae;g__Roseburia;s__                          | 4.93E-09 | 1.14E+01 | 1.36E+00 |
| 350363              | k__Bacteria;p__Firmicutes;c__Clostridia;o__Clostridiales;f__Lachnospiraceae;g__s__                                    | 5.62E-09 | 9.44E+01 | 4.70E+00 |
| 4347520             | k__Bacteria;p__Firmicutes;c__Clostridia;o__Clostridiales;f__g__s__                                                    | 5.62E-09 | 4.00E+00 | 4.48E+02 |
| 16204               | k__Bacteria;p__Firmicutes;c__Clostridia;o__Clostridiales;f__Clostridiaceae;g__Sarcina;s__                             | 6.02E-09 | 7.10E+01 | 1.94E+02 |
| 3600504             | k__Bacteria;p__Bacteroidetes;c__Bacteroidia;o__Bacteroidales;f__Bacteroidaceae;g__Bacteroides;s__                     | 6.04E-09 | 7.80E+01 | 2.15E+01 |
| 289929              | k__Bacteria;p__Firmicutes;c__Clostridia;o__Clostridiales;f__Lachnospiraceae;g__s__                                    | 6.05E-09 | 3.76E+00 | 1.08E+01 |
| 300297              | k__Bacteria;p__Firmicutes;c__Clostridia;o__Clostridiales;f__Lachnospiraceae;g__Dorea;s__                              | 6.17E-09 | 4.10E+00 | 3.88E+01 |

|                     |                                                                                                                  |          |          |          |
|---------------------|------------------------------------------------------------------------------------------------------------------|----------|----------|----------|
| 4438608             | k__Bacteria;p__Firmicutes;c__Bacilli;o__Bacillales;f__Planococcaceae;g__Solibacillus;s__                         | 7.03E-09 | 5.09E+01 | 1.34E+01 |
| 111024              | k__Bacteria;p__Firmicutes;c__Clostridia;o__Clostridiales;f__;g__;s__                                             | 7.56E-09 | 1.04E+00 | 6.87E+00 |
| 291292              | k__Bacteria;p__Verrucomicrobia;c__Verruco-5;o__WCHB1-41;f__RFP12;g__;s__                                         | 7.66E-09 | 4.37E-01 | 3.72E+00 |
| 4393532             | k__Bacteria;p__Actinobacteria;c__Coriobacteriia;o__Coriobacteriales;f__Coriobacteriaceae;g__Eggerthella;s__lenta | 8.03E-09 | 9.92E+00 | 3.07E+00 |
| 294812              | k__Bacteria;p__Firmicutes;c__Clostridia;o__Clostridiales;f__Ruminococcaceae;g__;s__                              | 8.07E-09 | 9.80E+00 | 4.93E-01 |
| 311293              | k__Bacteria;p__Firmicutes;c__Clostridia;o__Clostridiales;f__Lachnospiraceae;g__;s__                              | 8.75E-09 | 5.86E+00 | 3.28E-01 |
| 294229              | k__Bacteria;p__Firmicutes;c__Clostridia;o__Clostridiales;f__);g__);s__                                           | 8.90E-09 | 5.21E-01 | 2.88E+00 |
| 4466707             | k__Bacteria;p__Firmicutes;c__Clostridia;o__Clostridiales;f__Lachnospiraceae;g__Coprococcus;s__                   | 8.92E-09 | 6.86E+00 | 1.07E+00 |
| 327491              | k__Bacteria;p__Firmicutes;c__Clostridia;o__Clostridiales;f__Christensenellaceae;g__);s__                         | 9.44E-09 | 4.65E+00 | 1.47E+01 |
| 308086              | k__Bacteria;p__Firmicutes;c__Clostridia;o__Clostridiales;f__Christensenellaceae;g__);s__                         | 9.83E-09 | 1.27E-01 | 2.39E+00 |
| 1667433             | k__Bacteria;p__Firmicutes;c__Clostridia;o__Clostridiales;f__Lachnospiraceae;g__Dorea;s__                         | 1.03E-08 | 7.85E+00 | 2.69E-01 |
| 183207              | k__Bacteria;p__Firmicutes;c__Clostridia;o__Clostridiales;f__Lachnospiraceae;g__[Ruminococcus];s__                | 1.08E-08 | 4.72E+00 | 1.04E-01 |
| New.ReferenceOTU790 | k__Bacteria;p__Bacteroidetes;c__Bacteroidia;o__Bacteroidales;f__Bacteroidaceae;g__Bacteroides;s__                | 1.09E-08 | 1.90E+00 | 1.64E-01 |
| 287400              | k__Bacteria;p__Spirochaetes;c__Spirochaetes;o__Spirochaetales;f__Spirochaetaceae;g__Treponema;s__                | 1.11E-08 | 4.08E-01 | 2.67E+00 |
| 312588              | k__Bacteria;p__Firmicutes;c__Clostridia;o__Clostridiales;f__Lachnospiraceae;g__);s__                             | 1.11E-08 | 1.83E-01 | 1.73E+00 |
| 3486634             | k__Bacteria;p__Bacteroidetes;c__Bacteroidia;o__Bacteroidales;f__Bacteroidaceae;g__Bacteroides;s__uniformis       | 1.11E-08 | 4.30E+00 | 1.21E+00 |
| 297496              | k__Bacteria;p__Firmicutes;c__Clostridia;o__Clostridiales;f__Ruminococcaceae;g__);s__                             | 1.15E-08 | 4.99E+00 | 2.05E+01 |
| 550631              | k__Bacteria;p__Firmicutes;c__Clostridia;o__Clostridiales;f__);g__);s__                                           | 1.16E-08 | 1.83E-01 | 1.48E+00 |
| 312882              | k__Bacteria;p__Firmicutes;c__Clostridia;o__Clostridiales                                                         | 1.46E-08 | 5.24E+00 | 6.57E-01 |
| 320072              | k__Bacteria;p__Firmicutes;c__Clostridia;o__Clostridiales;f__Ruminococcaceae;g__);s__                             | 1.51E-08 | 5.94E+00 | 8.10E+00 |
| 259357              | k__Bacteria;p__Firmicutes;c__Clostridia;o__Clostridiales;f__Lachnospiraceae;g__Blautia;s__producta               | 1.72E-08 | 3.42E+00 | 2.99E-01 |
| 1046979             | k__Bacteria;p__Firmicutes;c__Clostridia;o__Clostridiales;f__Ruminococcaceae;g__);s__                             | 1.72E-08 | 1.55E-01 | 3.25E+00 |
| 258980              | k__Bacteria;p__Firmicutes;c__Clostridia;o__Clostridiales;f__);g__);s__                                           | 1.74E-08 | 3.56E+00 | 5.97E-02 |
| New.ReferenceOTU363 | k__Bacteria;p__Spirochaetes;c__Spirochaetes;o__Spirochaetales;f__Spirochaetaceae;g__Treponema;s__                | 1.77E-08 | 4.87E+00 | 1.34E-01 |
| 349123              | k__Bacteria;p__Firmicutes;c__Clostridia;o__Clostridiales;f__Christensenellaceae;g__);s__                         | 1.97E-08 | 4.11E+00 | 1.64E-01 |
| 199451              | k__Bacteria;p__Firmicutes;c__Clostridia;o__Clostridiales;f__Lachnospiraceae;g__Blautia;s__producta               | 1.99E-08 | 1.76E+00 | 1.04E-01 |
| 330276              | k__Bacteria;p__Bacteroidetes;c__Bacteroidia;o__Bacteroidales;f__);g__);s__                                       | 2.03E-08 | 6.76E-01 | 9.61E+00 |
| 294860              | k__Bacteria;p__Firmicutes;c__Clostridia;o__Clostridiales;f__[Mogibacteriaceae];g__);s__                          | 2.05E-08 | 9.58E-01 | 4.61E+00 |
| 594307              | k__Bacteria;p__WPS-2;c__;o__;f__);g__);s__                                                                       | 2.17E-08 | 3.38E-01 | 4.21E+00 |
| 339532              | k__Bacteria;p__Actinobacteria;c__Actinobacteria;o__Bifidobacteriales;f__Bifidobacteriaceae;g__);s__              | 2.17E-08 | 4.75E+00 | 4.18E-01 |
| 1951283             | k__Bacteria;p__Firmicutes;c__Bacilli;o__Bacillales;f__Planococcaceae;g__);s__                                    | 2.19E-08 | 2.27E+01 | 1.78E+00 |
| 310611              | k__Bacteria;p__Firmicutes;c__Clostridia;o__Clostridiales;f__);g__);s__                                           | 2.19E-08 | 2.79E+00 | 8.87E+00 |

|                         |                                                                                                                 |          |          |          |
|-------------------------|-----------------------------------------------------------------------------------------------------------------|----------|----------|----------|
| New.ReferenceOTU8<br>2  | k_Bacteria;p_Spirochaetes;c_Spirochaetes;o_Spirochaetales;f_Spirochaetaceae;g_Treponema;s__                     | 2.21E-08 | 1.10E+01 | 3.87E+01 |
| 194215                  | k_Bacteria;p_Firmicutes;c_Clostridia;o_Clostridiales;f_Ruminococcaceae;g__;s__                                  | 2.24E-08 | 1.58E+01 | 1.42E+00 |
| 336983                  | k_Bacteria;p_Firmicutes;c_Clostridia;o_Clostridiales;f_Lachnospiraceae;g_Blautia;s__                            | 2.24E-08 | 4.17E+00 | 7.46E+02 |
| New.ReferenceOTU8<br>95 | k_Archaea;p_Euryarchaeota;c_Methanobacteria;o_Methanobacteriales;f_Methanobacteriaceae;g_Methanobrevibacter;s__ | 2.26E-08 | 1.15E+01 | 3.75E+01 |
| 352529                  | k_Bacteria;p_Firmicutes;c_Clostridia;o_Clostridiales;f_Lachnospiraceae;g_[Ruminococcus];s_torques               | 2.29E-08 | 6.92E+00 | 6.72E+01 |
| 175336                  | k_Bacteria;p_Firmicutes;c_Clostridia;o_Clostridiales;f_Ruminococcaceae;g_Oscillospira;s__                       | 2.33E-08 | 6.08E+00 | 2.99E+02 |
| 295136                  | k_Bacteria;p_Verrucomicrobia;c_Verruco-5;o_WCHB1-41;f_RFP12;g__;s__                                             | 2.33E-08 | 2.66E+00 | 7.61E+00 |
| New.ReferenceOTU7<br>09 | k_Bacteria;p_Firmicutes;c_Clostridia;o_Clostridiales;f__;g__;s__                                                | 2.38E-08 | 2.39E+01 | 2.97E+00 |
| 215731                  | k_Bacteria;p_Firmicutes;c_Clostridia;o_Clostridiales;f__;g__;s__                                                | 2.45E-08 | 1.76E+00 | 1.47E+01 |
| 289966                  | k_Bacteria;p_Firmicutes;c_Clostridia;o_Clostridiales;f_[Mogibacteriaceae];g__;s__                               | 2.45E-08 | 1.51E+00 | 6.52E+00 |
| 4446053                 | k_Bacteria;p_Proteobacteria;c_Alphaproteobacteria;o__;f__;g__;s__                                               | 2.51E-08 | 7.66E+00 | 5.97E+02 |
| New.ReferenceOTU1<br>25 | k_Bacteria;p_Verrucomicrobia;c_Verruco-5;o_WCHB1-41;f_RFP12;g__;s__                                             | 2.60E-08 | 1.55E+01 | 3.61E+00 |
| 183849                  | k_Bacteria;p_Firmicutes;c_Clostridia;o_Clostridiales;f_Lachnospiraceae;g_Blautia;s_producta                     | 2.84E-08 | 3.20E+00 | 3.28E+01 |
| 1751298                 | k_Bacteria;p_Firmicutes;c_Clostridia;o_Clostridiales;f_Lachnospiraceae;g__;s__                                  | 2.95E-08 | 6.25E+00 | 1.49E+02 |
| 298517                  | k_Bacteria;p_Firmicutes;c_Clostridia;o_Clostridiales;f_Ruminococcaceae;g__;s__                                  | 3.05E-08 | 3.10E+01 | 3.42E+00 |
| 318204                  | k_Bacteria;p_Firmicutes;c_Clostridia;o_Clostridiales;f__;g__;s__                                                | 3.06E-08 | 5.28E+00 | 1.35E+01 |
| 4360363                 | k_Bacteria;p_Firmicutes;c_Clostridia;o_Clostridiales;f__;g__;s__                                                | 3.23E-08 | 4.68E+00 | 1.30E+01 |
| 302525                  | k_Bacteria;p_Firmicutes;c_Clostridia;o_Clostridiales;f__;g__;s__                                                | 3.37E-08 | 1.13E+01 | 4.03E+01 |
| 4307122                 | k_Bacteria;p_Bacteroidetes;c_Bacteroidia;o_Bacteroidales;f_[Odoribacteraceae];g_Odoribacter;s__                 | 3.47E-08 | 1.01E+01 | 1.84E+00 |
| 180577                  | k_Bacteria;p_Firmicutes;c_Clostridia;o_Clostridiales;f_Lachnospiraceae;g_Dorea;s__                              | 3.47E-08 | 1.99E+00 | 5.97E+02 |
| 291303                  | k_Bacteria;p_Firmicutes;c_Clostridia;o_Clostridiales;f_Lachnospiraceae;g__;s__                                  | 3.51E-08 | 5.63E+02 | 1.36E+00 |
| 4476780                 | k_Bacteria;p_Bacteroidetes;c_Bacteroidia;o_Bacteroidales;f_Rikenellaceae;g__;s__                                | 3.61E-08 | 5.72E+00 | 1.61E+00 |
| New.ReferenceOTU4<br>78 | k_Bacteria;p_Bacteroidetes;c_Bacteroidia;o_Bacteroidales;f_[Odoribacteraceae];g_Odoribacter;s__                 | 3.75E-08 | 1.08E+01 | 3.00E+00 |
| 512522                  | k_Bacteria;p_Firmicutes;c_Clostridia;o_Clostridiales;f__;g__;s__                                                | 3.86E-08 | 4.76E+00 | 1.28E+01 |
| 178839                  | k_Bacteria;p_Firmicutes;c_Clostridia;o_Clostridiales;f_[Mogibacteriaceae];g__;s__                               | 4.06E-08 | 4.68E+00 | 4.48E+02 |
| New.ReferenceOTU7<br>22 | k_Bacteria;p_Bacteroidetes;c_Bacteroidia;o_Bacteroidales;f__;g__;s__                                            | 4.38E-08 | 1.00E+00 | 6.45E+00 |
| 301621                  | k_Bacteria;p_Verrucomicrobia;c_Verruco-5;o_WCHB1-41;f_RFP12;g__;s__                                             | 4.38E-08 | 2.24E+00 | 9.84E+00 |
| 301994                  | k_Bacteria;p_Bacteroidetes;c_Bacteroidia;o_Bacteroidales;f__;g__;s__                                            | 4.51E-08 | 2.06E+00 | 7.42E+00 |
| 300123                  | k_Bacteria;p_Firmicutes;c_Clostridia;o_Clostridiales;f_Lachnospiraceae;g_Coproccoccus;s__                       | 4.51E-08 | 2.82E+02 | 6.61E+00 |
| 178712                  | k_Bacteria;p_Firmicutes;c_Clostridia;o_Clostridiales;f__;g__;s__                                                | 5.40E-08 | 7.03E+01 | 2.31E+01 |
| 291133                  | k_Bacteria;p_Verrucomicrobia;c_Verruco-5;o_WCHB1-41;f_RFP12;g__;s__                                             | 5.40E-08 | 2.68E+01 | 1.69E+00 |
| 110847                  | k_Bacteria;p_Firmicutes;c_Clostridia;o_Clostridiales;f_Christensenellaceae;g__;s__                              | 5.49E-08 | 5.73E+00 | 2.91E+01 |



|                     |                                                                                                                       |          |          |          |
|---------------------|-----------------------------------------------------------------------------------------------------------------------|----------|----------|----------|
| 4423553             | k__Bacteria;p__Firmicutes;c__Clostridia;o__Clostridiales;f__Ruminococcaceae;g__s__                                    | 5.52E-08 | 1.80E+01 | 5.46E+00 |
| New.ReferenceOTU767 | k__Bacteria;p__Firmicutes;c__Clostridia;o__Clostridiales;f__Ruminococcaceae;g__s__                                    | 5.52E-08 | 1.80E+00 | 7.97E+00 |
| 295856              | k__Bacteria;p__Firmicutes;c__Clostridia;o__Clostridiales;f__Ruminococcaceae;g__s__                                    | 5.55E-08 | 8.45E-02 | 1.30E+00 |
| 510286              | k__Bacteria;p__Firmicutes;c__Clostridia;o__Clostridiales;f__Lachnospiraceae;g__s__                                    | 5.71E-08 | 1.49E+00 | 7.46E+02 |
| 3439403             | k__Bacteria;p__Bacteroidetes;c__Bacteroidia;o__Bacteroidales;f__Bacteroidaceae;g__Bacteroides;s__                     | 6.00E-08 | 1.01E+01 | 2.58E+00 |
| 196333              | k__Bacteria;p__Firmicutes;c__Clostridia;o__Clostridiales;f__Lachnospiraceae;g__Blautia;s__producta                    | 6.14E-08 | 1.04E+00 | 1.49E+02 |
| 291743              | k__Bacteria;p__Firmicutes;c__Clostridia;o__Clostridiales;f__g__s__                                                    | 6.43E-08 | 5.28E+00 | 2.31E+01 |
| 194597              | k__Bacteria;p__Firmicutes;c__Clostridia;o__Clostridiales;f__g__s__                                                    | 6.89E-08 | 4.52E+00 | 0.00E+00 |
| 339988              | k__Bacteria;p__Firmicutes;c__Clostridia;o__Clostridiales;f__Ruminococcaceae;g__s__                                    | 7.24E-08 | 1.11E+01 | 3.50E+01 |
| New.ReferenceOTU215 | k__Bacteria;p__Firmicutes;c__Clostridia;o__Clostridiales;f__Ruminococcaceae;g__Ruminococcus;s__                       | 7.61E-08 | 1.07E+00 | 1.36E+01 |
| 355922              | k__Bacteria;p__Firmicutes;c__Clostridia;o__Clostridiales;f__Ruminococcaceae;g__s__                                    | 7.61E-08 | 4.23E-01 | 2.03E+00 |
| 349093              | k__Bacteria;p__Firmicutes;c__Clostridia;o__Clostridiales;f__g__s__                                                    | 7.66E-08 | 1.18E+00 | 5.04E+00 |
| New.ReferenceOTU947 | k__Bacteria;p__Firmicutes;c__Clostridia;o__Clostridiales;f__g__s__                                                    | 7.80E-08 | 2.15E+00 | 1.04E-01 |
| 194584              | k__Bacteria;p__Firmicutes;c__Clostridia;o__Clostridiales;f__Ruminococcaceae;g__s__                                    | 7.92E-08 | 6.77E+00 | 1.45E+00 |
| 351163              | k__Bacteria;p__Firmicutes;c__Clostridia;o__Clostridiales;f__Lachnospiraceae;g__Blautia;s__producta                    | 7.95E-08 | 1.39E+00 | 5.97E-02 |
| New.ReferenceOTU618 | k__Bacteria;p__Firmicutes;c__Clostridia;o__Clostridiales;f__Lachnospiraceae                                           | 7.95E-08 | 2.01E+00 | 3.28E-01 |
| 185420              | k__Bacteria;p__Bacteroidetes;c__Bacteroidia;o__Bacteroidales;f__Bacteroidaceae;g__Bacteroides;s__                     | 8.19E-08 | 9.44E+00 | 1.01E+00 |
| 290418              | k__Bacteria;p__Spirochaetes;c__Spirochaetes;o__Spirochaetales;f__Spirochaetaceae;g__Treponema;s__                     | 9.06E-08 | 9.30E-01 | 4.96E+00 |
| 1952                | k__Bacteria;p__Bacteroidetes;c__Bacteroidia;o__Bacteroidales;f__Porphyromonadaceae;g__Parabacteroides;s__             | 9.67E-08 | 1.66E+01 | 2.04E+00 |
| 291535              | k__Bacteria;p__Firmicutes;c__Clostridia;o__Clostridiales;f__Lachnospiraceae;g__s__                                    | 9.89E-08 | 9.94E+00 | 4.78E+01 |
| 3563235             | k__Bacteria;p__Bacteroidetes;c__Bacteroidia;o__Bacteroidales;f__Bacteroidaceae;g__Bacteroides;s__                     | 1.05E-07 | 4.17E+01 | 1.23E+01 |
| 106860              | k__Bacteria;p__Firmicutes;c__Clostridia;o__Clostridiales;f__Lachnospiraceae;g__s__                                    | 1.10E-07 | 1.41E-01 | 3.25E+00 |
| 350360              | k__Bacteria;p__Bacteroidetes;c__Bacteroidia;o__Bacteroidales;f__g__s__                                                | 1.10E-07 | 5.92E-01 | 7.19E+00 |
| 526583              | k__Bacteria;p__Firmicutes;c__Clostridia;o__Clostridiales;f__Peptostreptococcaceae;g__s__                              | 1.18E-07 | 3.83E+00 | 3.28E-01 |
| 153168              | k__Archaea;p__Euryarchaeota;c__Methanobacteria;o__Methanobacteriales;f__Methanobacteriaceae;g__Methanobrevibacter;s__ | 1.22E-07 | 1.68E+02 | 5.37E+02 |
| 320863              | k__Bacteria;p__Firmicutes;c__Clostridia;o__Clostridiales;f__Lachnospiraceae;g__s__                                    | 1.23E-07 | 7.89E-01 | 5.94E+00 |
| 303347              | k__Bacteria;p__Bacteroidetes;c__Bacteroidia;o__Bacteroidales;f__g__s__                                                | 1.23E-07 | 4.23E-02 | 1.45E+00 |
| 297210              | k__Bacteria;p__Firmicutes;c__Clostridia;o__Clostridiales;f__g__s__                                                    | 1.23E-07 | 9.01E-01 | 2.52E+00 |
| 327184              | k__Bacteria;p__Firmicutes;c__Clostridia;o__Clostridiales;f__g__s__                                                    | 1.25E-07 | 1.32E+00 | 9.76E+00 |
| 208479              | k__Bacteria;p__Bacteroidetes;c__Bacteroidia;o__Bacteroidales;f__[Odoribacteraceae];g__Butyricimonas;s__               | 1.26E-07 | 1.25E+01 | 1.60E+00 |
| 310601              | k__Bacteria;p__Firmicutes;c__Clostridia;o__Clostridiales;f__Christensenellaceae;g__s__                                | 1.40E-07 | 1.49E+00 | 4.55E+00 |
| 293605              | k__Bacteria;p__Bacteroidetes;c__Bacteroidia;o__Bacteroidales;f__g__s__                                                | 1.42E-07 | 3.63E+00 | 2.28E+01 |

|                                |                                                                                                        |          |          |          |
|--------------------------------|--------------------------------------------------------------------------------------------------------|----------|----------|----------|
| 300139                         | k_Bacteria;p_Firmicutes;c_Clostridia;o_Clostridiales;f_g_s                                             | 1.43E-07 | 5.92E-01 | 4.58E+00 |
| 3588390                        | k_Bacteria;p_Bacteroidetes;c_Bacteroidia;o_Bacteroidales;f_Bacteroidaceae;g_Bacteroides;s              | 1.44E-07 | 1.99E+01 | 5.39E+00 |
| 214036                         | k_Bacteria;p_Firmicutes;c_Clostridia;o_Clostridiales;f_[Mogibacteriaceae];g_s                          | 1.44E-07 | 1.87E+00 | 1.79E+01 |
| 234959                         | k_Bacteria;p_Tenericutes;c_Mollicutes;o_RF39;f_g_s                                                     | 1.47E-07 | 6.00E+00 | 3.28E+01 |
| New.CleanUp.ReferenceOTU178859 | Unassigned                                                                                             | 1.47E-07 | 2.54E+01 | 2.76E+00 |
| 301334                         | k_Bacteria;p_Verrucomicrobia;c_Verruco-5;o_WCHB1-41;f_RFP12;g_s                                        | 1.48E-07 | 9.86E+01 | 4.19E+00 |
| 331281                         | k_Bacteria;p_Firmicutes;c_Clostridia;o_Clostridiales;f_Clostridiaceae;g_s                              | 1.48E-07 | 2.46E+01 | 1.14E+01 |
| 289217                         | k_Bacteria;p_Spirochaetes;c_Spirochaetes;o_Spirochaetales;f_Spirochaetaceae;g_Treponema;s              | 1.53E-07 | 1.41E+01 | 1.18E+00 |
| New.ReferenceOTU292            | k_Bacteria;p_Bacteroidetes;c_Bacteroidia;o_Bacteroidales;f_g_s                                         | 1.59E-07 | 3.66E+01 | 3.70E+00 |
| 298714                         | k_Bacteria;p_Firmicutes;c_Clostridia;o_Clostridiales;f_Lachnospiraceae;g_s                             | 1.59E-07 | 2.13E+00 | 1.18E+01 |
| New.ReferenceOTU42             | k_Bacteria;p_Firmicutes;c_Clostridia;o_Clostridiales;f_Eubacteriaceae;g_Pseudoramibacter_Eubacterium;s | 1.61E-07 | 2.49E+00 | 1.50E+01 |
| 297140                         | k_Bacteria;p_Spirochaetes;c_Spirochaetes;o_Spirochaetales;f_Spirochaetaceae;g_Treponema;s              | 1.67E-07 | 1.17E+00 | 4.63E+00 |
| 338105                         | k_Bacteria;p_Firmicutes;c_Clostridia;o_Clostridiales                                                   | 1.68E-07 | 2.07E+00 | 2.54E+01 |
| New.ReferenceOTU232            | k_Bacteria;p_Planctomycetes;c_Planctomycetia;o_Pirellulales;f_Pirellulaceae;g_s                        | 1.77E-07 | 8.45E+02 | 1.79E+00 |
| New.ReferenceOTU518            | k_Bacteria;p_Bacteroidetes;c_Bacteroidia;o_Bacteroidales;f_g_s                                         | 1.77E-07 | 8.03E+01 | 6.34E+00 |
| 2256425                        | k_Bacteria;p_Firmicutes;c_Clostridia;o_Clostridiales;f_Christensenellaceae;g_s                         | 1.77E-07 | 3.28E+00 | 4.33E+01 |
| 293925                         | k_Bacteria;p_Verrucomicrobia;c_Verruco-5;o_WCHB1-41;f_RFP12;g_s                                        | 1.94E-07 | 3.52E+01 | 1.82E+00 |
| 350909                         | k_Bacteria;p_Bacteroidetes;c_Bacteroidia;o_Bacteroidales;f_g_s                                         | 1.94E-07 | 7.18E+01 | 3.64E+00 |
| New.ReferenceOTU23             | k_Bacteria;p_Firmicutes;c_Clostridia;o_Clostridiales;f_Christensenellaceae;g_s                         | 1.98E-07 | 1.58E+00 | 4.45E+00 |
| 4442899                        | k_Bacteria;p_Firmicutes;c_Clostridia;o_Clostridiales;f_g_s                                             | 2.09E-07 | 7.28E+00 | 7.46E+02 |
| New.ReferenceOTU14             | k_Bacteria;p_Firmicutes;c_Clostridia;o_Clostridiales;f_g_s                                             | 2.19E-07 | 1.59E+00 | 5.51E+00 |
| New.ReferenceOTU611            | k_Bacteria;p_Firmicutes;c_Clostridia;o_Clostridiales;f_Ruminococcaceae;g_Ruminococcus;s                | 2.22E-07 | 2.82E+02 | 4.82E+00 |
| 352027                         | k_Bacteria;p_Firmicutes;c_Clostridia;o_Clostridiales;f_[Mogibacteriaceae];g_s                          | 2.23E-07 | 1.54E+00 | 6.85E+00 |
| 292215                         | k_Bacteria;p_Firmicutes;c_Clostridia;o_Clostridiales;f_g_s                                             | 2.25E-07 | 5.49E+01 | 2.51E+00 |
| 292458                         | k_Bacteria;p_Spirochaetes;c_Spirochaetes;o_Spirochaetales;f_Spirochaetaceae;g_Treponema;s              | 2.26E-07 | 1.83E+01 | 1.76E+00 |
| 326785                         | k_Bacteria;p_Firmicutes;c_Clostridia;o_Clostridiales;f_Ruminococcaceae;g_s                             | 2.37E-07 | 1.84E+01 | 5.03E+01 |
| 320587                         | k_Bacteria;p_Firmicutes;c_Clostridia;o_Clostridiales;f_Ruminococcaceae;g_Ruminococcus;s                | 2.38E-07 | 7.37E+00 | 2.06E+01 |
| 575681                         | k_Bacteria;p_Firmicutes;c_Clostridia;o_Clostridiales;f_Christensenellaceae;g_s                         | 2.48E-07 | 7.04E+02 | 8.49E+00 |
| 3421266                        | k_Bacteria;p_Firmicutes;c_Clostridia;o_Clostridiales;f_Lachnospiraceae;g_[Ruminococcus];s              | 2.51E-07 | 4.15E+00 | 1.49E+02 |
| 263895                         | k_Bacteria;p_Firmicutes;c_Clostridia;o_Clostridiales;f_Peptococcaceae;g_rc4-4;s                        | 2.73E-07 | 2.28E+00 | 3.73E+01 |
| 178770                         | k_Bacteria;p_Firmicutes;c_Clostridia;o_Clostridiales;f_Lachnospiraceae;g_Dorea;s                       | 2.75E-07 | 9.72E+01 | 0.00E+00 |
| 299042                         | k_Bacteria;p_Firmicutes;c_Clostridia;o_Clostridiales;f_g_s                                             | 2.75E-07 | 1.44E+01 | 3.00E+01 |

|                     |                                                                                                         |          |          |          |
|---------------------|---------------------------------------------------------------------------------------------------------|----------|----------|----------|
| 289426              | k__Bacteria;p__Firmicutes;c__Clostridia;o__Clostridiales;f__Ruminococcaceae;g__Oscillospira;s__         | 2.82E-07 | 1.41E-02 | 2.54E+00 |
| 1141834             | k__Bacteria;p__Verrucomicrobia;c__Verruco-5;o__WCHB1-41;f__RFP12;g__s__                                 | 2.86E-07 | 1.20E+00 | 5.13E+00 |
| 4396292             | k__Bacteria;p__Firmicutes;c__Clostridia;o__Clostridiales;f__Lachnospiraceae;g__s__                      | 2.86E-07 | 2.80E+00 | 8.96E+02 |
| 354563              | k__Bacteria;p__Firmicutes;c__Clostridia;o__Clostridiales;f__Lachnospiraceae;g__s__                      | 2.91E-07 | 9.30E-01 | 5.81E+00 |
| 4436975             | k__Bacteria;p__Firmicutes;c__Bacilli;o__Lactobacillales;f__Streptococcaceae;g__Streptococcus;s__        | 2.91E-07 | 1.21E+01 | 1.48E+00 |
| 179657              | k__Bacteria;p__Firmicutes;c__Clostridia;o__Clostridiales;f__Lachnospiraceae;g__Blautia;s__producta      | 3.00E-07 | 3.31E+00 | 4.78E+01 |
| 2771899             | k__Bacteria;p__Firmicutes;c__Clostridia;o__Clostridiales;f__Ruminococcaceae;g__s__                      | 3.01E-07 | 4.61E+00 | 1.34E+01 |
| 347801              | k__Bacteria;p__Firmicutes;c__Clostridia;o__Clostridiales;f__Lachnospiraceae;g__s__                      | 3.02E-07 | 6.77E+00 | 1.52E+00 |
| New.ReferenceOTU310 | k__Bacteria;p__Firmicutes;c__Clostridia;o__Clostridiales;f__Lachnospiraceae;g__s__                      | 3.31E-07 | 6.48E-01 | 4.52E+00 |
| New.ReferenceOTU811 | k__Bacteria;p__Spirochaetes;c__Spirochaetes;o__Spirochaetales;f__Spirochaetaceae;g__Treponema;s__       | 3.44E-07 | 3.66E-01 | 2.16E+00 |
| 292057              | k__Bacteria;p__Firmicutes;c__Bacilli;o__Lactobacillales;f__Lactobacillaceae;g__Lactobacillus;s__        | 3.52E-07 | 8.07E+00 | 2.99E+01 |
| 345353              | k__Bacteria;p__Firmicutes;c__Clostridia;o__Clostridiales;f__Ruminococcaceae;g__s__                      | 3.53E-07 | 1.07E+00 | 3.64E+00 |
| 183450              | k__Bacteria;p__Firmicutes;c__Clostridia;o__Clostridiales;f__Lachnospiraceae;g__Blautia;s__              | 3.55E-07 | 1.52E+00 | 2.69E+01 |
| 4267520             | k__Bacteria;p__Firmicutes;c__Clostridia;o__Clostridiales;f__Ruminococcaceae;g__s__                      | 3.85E-07 | 2.72E+00 | 1.64E+01 |
| 180585              | k__Bacteria;p__Firmicutes;c__Clostridia;o__Clostridiales;f__g__s__                                      | 3.97E-07 | 3.34E+00 | 5.37E+01 |
| 295951              | k__Bacteria;p__Firmicutes;c__Clostridia;o__Clostridiales;f__Lachnospiraceae;g__s__                      | 4.03E-07 | 2.42E+00 | 9.01E+00 |
| 590836              | k__Bacteria;p__Firmicutes;c__Bacilli;o__Lactobacillales;f__Lactobacillaceae;g__Lactobacillus;s__        | 4.25E-07 | 1.75E+01 | 6.66E+00 |
| New.ReferenceOTU993 | k__Bacteria;p__Firmicutes;c__Clostridia;o__Clostridiales;f__Ruminococcaceae;g__s__                      | 4.33E-07 | 2.01E+00 | 6.12E+00 |
| New.ReferenceOTU564 | k__Bacteria;p__Firmicutes;c__Clostridia;o__Clostridiales;f__g__s__                                      | 4.45E-07 | 1.25E+01 | 1.87E+01 |
| 302375              | k__Bacteria;p__Firmicutes;c__Clostridia;o__Clostridiales;f__[Mogibacteriaceae];g__s__                   | 4.53E-07 | 1.85E+00 | 5.39E+00 |
| 344208              | k__Bacteria;p__Firmicutes;c__Clostridia;o__Clostridiales;f__Ruminococcaceae;g__s__                      | 4.75E-07 | 3.66E-01 | 2.67E+00 |
| 2272351             | k__Bacteria;p__Firmicutes;c__Clostridia;o__Clostridiales;f__g__s__                                      | 4.77E-07 | 4.04E+00 | 4.48E+02 |
| 4296763             | k__Bacteria;p__Firmicutes;c__Clostridia;o__Clostridiales;f__g__s__                                      | 4.83E-07 | 5.63E-01 | 4.33E+00 |
| 321517              | k__Bacteria;p__Firmicutes;c__Clostridia;o__Clostridiales;f__Ruminococcaceae;g__Ruminococcus;s__         | 4.96E-07 | 1.24E+00 | 8.15E+00 |
| New.ReferenceOTU69  | k__Bacteria;p__Firmicutes;c__Clostridia;o__Clostridiales;f__g__s__                                      | 5.05E-07 | 1.31E+00 | 6.51E+00 |
| 306288              | k__Bacteria;p__Firmicutes;c__Clostridia;o__Clostridiales;f__Lachnospiraceae;g__Coprococcus;s__          | 5.12E-07 | 3.54E+00 | 5.22E+01 |
| 175087              | k__Bacteria;p__Firmicutes;c__Clostridia;o__Clostridiales                                                | 5.15E-07 | 1.24E+00 | 1.19E+01 |
| 333114              | k__Bacteria;p__Firmicutes;c__Clostridia;o__Clostridiales                                                | 5.19E-07 | 1.07E+00 | 0.00E+00 |
| 1147637             | k__Bacteria;p__Actinobacteria;c__Coriobacteriia;o__Coriobacteriales;f__Coriobacteriaceae;g__Slackia;s__ | 5.19E-07 | 4.11E+00 | 0.00E+00 |
| New.ReferenceOTU984 | k__Bacteria;p__Firmicutes;c__Clostridia;o__Clostridiales;f__g__s__                                      | 5.51E-07 | 1.41E-02 | 2.81E+00 |
| 323737              | k__Bacteria;p__Firmicutes;c__Clostridia;o__Clostridiales;f__Ruminococcaceae;g__s__                      | 5.57E-07 | 1.55E-01 | 1.03E+00 |
| 110910              | k__Bacteria;p__Firmicutes;c__Clostridia;o__Clostridiales;f__Christensenellaceae;g__s__                  | 5.59E-07 | 1.24E+01 | 1.89E+01 |

|                               |                                                                                                                    |          |          |          |
|-------------------------------|--------------------------------------------------------------------------------------------------------------------|----------|----------|----------|
| 3426658                       | k__Bacteria;p__Bacteroidetes;c__Bacteroidia;o__Bacteroidales;f__Bacteroidaceae;g__Bacteroides;s__                  | 5.66E-07 | 1.00E+01 | 2.64E+00 |
| New.CleanUp.ReferenceOTU24359 | k__Bacteria;p__Spirochaetes;c__Spirochaetes;o__Spirochaetales;f__Spirochaetaceae;g__Treponema;s__                  | 5.75E-07 | 4.23E-02 | 1.69E+00 |
| 301127                        | k__Bacteria;p__Chloroflexi;c__Anaerolineae;o__Anaerolineales;f__Anaerolineaceae;g__SHD-231;s__                     | 5.86E-07 | 5.07E-01 | 3.34E+00 |
| 180107                        | k__Bacteria;p__Firmicutes;c__Clostridia;o__Clostridiales;f__Ruminococcaceae;g__Ruminococcus;s__                    | 5.92E-07 | 2.92E+00 | 3.43E+01 |
| New.ReferenceOTU179           | k__Bacteria;p__Bacteroidetes;c__Bacteroidia;o__Bacteroidales;f__[Paraprevotellaceae];g__;s__                       | 5.97E-07 | 7.75E-01 | 6.15E+00 |
| 331675                        | k__Bacteria;p__Verrucomicrobia;c__Verruco-5;o__LD1-PB3;f__;g__;s__                                                 | 6.08E-07 | 1.41E-02 | 6.07E+00 |
| 300250                        | k__Bacteria;p__Firmicutes;c__Clostridia;o__Clostridiales                                                           | 6.20E-07 | 4.08E-01 | 3.94E+00 |
| 288119                        | k__Bacteria;p__Bacteroidetes;c__Bacteroidia;o__Bacteroidales;f__BS11;g__;s__                                       | 6.36E-07 | 6.20E-01 | 8.75E+00 |
| 395587                        | k__Bacteria;p__Firmicutes;c__Clostridia;o__Clostridiales;f__Ruminococcaceae;g__;s__                                | 6.38E-07 | 4.86E+00 | 1.49E-01 |
| 360636                        | k__Bacteria;p__Firmicutes;c__Erysipelotrichi;o__Erysipelotrichales;f__Erysipelotrichaceae;g__;s__                  | 6.38E-07 | 9.48E+00 | 1.99E+00 |
| 304757                        | k__Bacteria;p__Firmicutes;c__Clostridia;o__Clostridiales;f__Lachnospiraceae;g__Blautia;s__                         | 6.87E-07 | 2.69E+00 | 2.99E-02 |
| New.ReferenceOTU444           | k__Bacteria;p__Firmicutes;c__Clostridia;o__Clostridiales;f__Lachnospiraceae;g__Coprococcus;s__                     | 6.98E-07 | 2.59E+00 | 5.09E+00 |
| 296079                        | k__Bacteria;p__Bacteroidetes;c__Bacteroidia;o__Bacteroidales;f__;g__;s__                                           | 7.02E-07 | 3.44E+00 | 1.20E+01 |
| 746079                        | k__Bacteria;p__Bacteroidetes;c__Bacteroidia;o__Bacteroidales;f__;g__;s__                                           | 7.06E-07 | 5.63E-02 | 3.99E+00 |
| 288873                        | k__Bacteria;p__Bacteroidetes;c__Bacteroidia;o__Bacteroidales;f__;g__;s__                                           | 7.25E-07 | 2.20E+00 | 7.64E+00 |
| 365297                        | k__Bacteria;p__Firmicutes;c__Clostridia;o__Clostridiales;f__;g__;s__                                               | 7.35E-07 | 3.75E+00 | 3.58E-01 |
| New.ReferenceOTU712           | k__Bacteria;p__Firmicutes;c__Clostridia;o__Clostridiales;f__[Mogibacteriaceae];g__;s__                             | 7.41E-07 | 7.45E+00 | 1.60E+01 |
| 328254                        | k__Bacteria;p__Bacteroidetes;c__Bacteroidia;o__Bacteroidales;f__;g__;s__                                           | 7.49E-07 | 9.58E-01 | 2.96E+00 |
| 288541                        | k__Bacteria;p__Bacteroidetes;c__Bacteroidia;o__Bacteroidales;f__;g__;s__                                           | 7.54E-07 | 4.92E+00 | 1.79E+01 |
| 3154070                       | k__Bacteria;p__Bacteroidetes;c__Bacteroidia;o__Bacteroidales;f__Bacteroidaceae;g__Bacteroides;s__                  | 7.54E-07 | 2.42E+00 | 6.72E-01 |
| 308338                        | k__Bacteria;p__Firmicutes;c__Clostridia;o__Clostridiales;f__Lachnospiraceae;g__Dorea;s__                           | 7.54E-07 | 7.31E+01 | 2.25E+01 |
| 293133                        | k__Bacteria;p__Firmicutes;c__Clostridia;o__Clostridiales;f__[Mogibacteriaceae];g__;s__                             | 7.72E-07 | 2.69E+00 | 5.64E+00 |
| 101237                        | k__Bacteria;p__Firmicutes;c__Clostridia;o__Clostridiales;f__Lachnospiraceae;g__Coprococcus;s__                     | 7.76E-07 | 1.03E+01 | 3.07E+01 |
| 4468892                       | k__Bacteria;p__Firmicutes;c__Clostridia;o__Clostridiales;f__Ruminococcaceae;g__;s__                                | 7.90E-07 | 9.58E-01 | 8.96E-02 |
| 305417                        | k__Bacteria;p__Firmicutes;c__Clostridia;o__Clostridiales;f__;g__;s__                                               | 8.03E-07 | 9.86E-01 | 3.73E+00 |
| 344306                        | k__Bacteria;p__Bacteroidetes;c__Bacteroidia;o__Bacteroidales;f__Bacteroidaceae;g__BF311;s__                        | 8.26E-07 | 5.77E-01 | 9.01E+00 |
| 321606                        | k__Bacteria;p__Verrucomicrobia;c__Verrucomicrobiae;o__Verrucomicrobiales;f__Verrucomicrobiaceae;g__Akkermansia;s__ | 8.27E-07 | 1.80E+01 | 5.09E+01 |
| 121873                        | k__Bacteria;p__Firmicutes;c__Clostridia;o__Clostridiales;f__Dehalobacteriaceae;g__Dehalobacterium;s__              | 8.90E-07 | 5.21E-01 | 2.34E+00 |
| 182886                        | k__Bacteria;p__Bacteroidetes;c__Bacteroidia;o__Bacteroidales;f__Bacteroidaceae;g__Bacteroides;s__uniformis         | 8.90E-07 | 9.30E-01 | 1.49E-02 |
| New.ReferenceOTU221           | k__Bacteria;p__Bacteroidetes;c__Bacteroidia;o__Bacteroidales;f__;g__;s__                                           | 8.98E-07 | 2.96E-01 | 2.67E+00 |
| 110563                        | k__Bacteria;p__Firmicutes;c__Clostridia;o__Clostridiales;f__Ruminococcaceae;g__;s__                                | 8.98E-07 | 8.55E+00 | 2.51E+01 |
| New.ReferenceOTU156           | k__Bacteria;p__Verrucomicrobia;c__Verruco-5;o__WCHB1-41;f__RFP12;g__;s__                                           | 8.98E-07 | 2.96E-01 | 1.82E+00 |

|                                |                                                                                                                    |          |          |          |
|--------------------------------|--------------------------------------------------------------------------------------------------------------------|----------|----------|----------|
| New.CleanUp.ReferenceOTU176789 | k__Bacteria;p__Firmicutes;c__Clostridia;o__Clostridiales;f__g__s__                                                 | 8.98E-07 | 2.11E-01 | 2.96E+00 |
| 288438                         | k__Bacteria;p__Firmicutes;c__Clostridia;o__Clostridiales;f__g__s__                                                 | 9.27E-07 | 5.63E+00 | 5.07E+01 |
| New.CleanUp.ReferenceOTU111068 | k__Bacteria;p__Firmicutes;c__Clostridia;o__Clostridiales;f__Clostridiaceae;g__Clostridium;s__                      | 9.32E-07 | 1.15E+00 | 1.49E+02 |
| 275237                         | k__Bacteria;p__Firmicutes;c__Clostridia;o__Clostridiales;f__Veillonellaceae;g__Phascolarctobacterium;s__           | 9.37E-07 | 2.72E+01 | 1.76E+00 |
| 310409                         | k__Bacteria;p__Firmicutes;c__Clostridia;o__Clostridiales;f__Lachnospiraceae;g__s__                                 | 9.64E-07 | 2.62E+00 | 5.34E+00 |
| 4370257                        | k__Bacteria;p__Firmicutes;c__Clostridia;o__Clostridiales;f__Ruminococcaceae;g__s__                                 | 9.66E-07 | 5.07E-01 | 3.85E+00 |
| 336333                         | k__Bacteria;p__Firmicutes;c__Clostridia;o__Clostridiales;f__Eubacteriaceae;g__Anaerofustis;s__                     | 1.02E-06 | 9.15E-01 | 3.78E+00 |
| 328905                         | k__Bacteria;p__Firmicutes;c__Clostridia;o__Clostridiales;f__Ruminococcaceae;g__Oscillospira;s__                    | 1.08E-06 | 1.90E+00 | 8.96E+02 |
| 301137                         | k__Bacteria;p__Actinobacteria;c__Coriobacteriia;o__Coriobacteriales;f__Coriobacteriaceae;g__s__                    | 1.08E-06 | 1.28E+00 | 3.82E+00 |
| 290862                         | k__Bacteria;p__Verrucomicrobia;c__Verruco-5;o__WCHB1-41;f__RFP12;g__s__                                            | 1.09E-06 | 1.83E-01 | 1.52E+00 |
| 351533                         | k__Bacteria;p__Bacteroidetes;c__Bacteroidia;o__Bacteroidales;f__g__s__                                             | 1.09E-06 | 3.38E-01 | 3.52E+00 |
| 291494                         | k__Bacteria;p__Firmicutes;c__Clostridia;o__Clostridiales;f__g__s__                                                 | 1.10E-06 | 7.04E-02 | 1.27E+00 |
| 155951                         | k__Bacteria;p__Firmicutes;c__Clostridia;o__Clostridiales;f__Ruminococcaceae;g__Ruminococcus;s__                    | 1.11E-06 | 1.72E+00 | 7.39E+00 |
| 295070                         | k__Bacteria;p__Firmicutes;c__Clostridia;o__Clostridiales;f__g__s__                                                 | 1.11E-06 | 1.89E+00 | 5.18E+00 |
| New.ReferenceOTU398            | k__Bacteria;p__Bacteroidetes;c__Bacteroidia;o__Bacteroidales;f__Bacteroidaceae;g__s__                              | 1.12E-06 | 2.06E+00 | 8.16E+00 |
| 320353                         | k__Bacteria;p__Verrucomicrobia;c__Verruco-5;o__WCHB1-41;f__RFP12;g__s__                                            | 1.12E-06 | 3.83E+00 | 6.96E+00 |
| 288494                         | k__Bacteria;p__Verrucomicrobia;c__Verrucomicrobiae;o__Verrucomicrobiales;f__Verrucomicrobiaceae;g__Akkermansia;s__ | 1.12E-06 | 2.75E+00 | 1.45E+01 |
| 102221                         | k__Bacteria;p__Firmicutes;c__Clostridia;o__Clostridiales;f__Lachnospiraceae;g__s__                                 | 1.14E-06 | 3.46E+00 | 9.46E+00 |
| 288594                         | k__Bacteria;p__Spirochaetes;c__Spirochaetes;o__Spirochaetales;f__Spirochaetaceae;g__Treponema;s__                  | 1.15E-06 | 6.76E-01 | 3.21E+00 |
| New.ReferenceOTU281            | k__Bacteria;p__Firmicutes;c__Clostridia;o__Clostridiales;f__Lachnospiraceae;g__s__                                 | 1.15E-06 | 5.49E-01 | 2.49E+00 |
| New.ReferenceOTU972            | k__Bacteria;p__Bacteroidetes;c__Bacteroidia;o__Bacteroidales;f__[Paraprevotellaceae];g__YRC22;s__                  | 1.20E-06 | 2.07E+00 | 8.52E+00 |
| New.ReferenceOTU809            | k__Bacteria;p__Actinobacteria;c__Actinobacteria;o__Actinomycetales;f__Actinomycetaceae;g__Arcanobacterium;s__      | 1.26E-06 | 1.24E+00 | 6.42E+00 |
| 307890                         | k__Bacteria;p__Firmicutes;c__Clostridia;o__Clostridiales;f__Lachnospiraceae;g__Blautia;s__                         | 1.28E-06 | 2.21E+00 | 2.99E-02 |
| 358030                         | k__Bacteria;p__Firmicutes;c__Clostridia;o__Clostridiales;f__Ruminococcaceae;g__s__                                 | 1.29E-06 | 1.90E+00 | 1.04E-01 |
| New.ReferenceOTU402            | k__Bacteria;p__Firmicutes;c__Clostridia;o__Clostridiales;f__g__s__                                                 | 1.33E-06 | 3.89E+00 | 2.99E-02 |
| 150412                         | k__Bacteria;p__Bacteroidetes;c__Bacteroidia;o__Bacteroidales;f__Porphyromonadaceae;g__Parabacteroides;s__          | 1.39E-06 | 6.86E+00 | 6.12E-01 |
| New.ReferenceOTU12             | k__Bacteria;p__Verrucomicrobia;c__Verrucomicrobiae;o__Verrucomicrobiales;f__Verrucomicrobiaceae;g__Akkermansia;s__ | 1.42E-06 | 1.68E+00 | 1.66E+01 |
| 288557                         | k__Bacteria;p__Firmicutes;c__Clostridia;o__Clostridiales;f__Ruminococcaceae;g__s__                                 | 1.45E-06 | 1.73E+00 | 5.25E+00 |
| 16006                          | k__Bacteria;p__Firmicutes;c__Clostridia;o__Clostridiales;f__g__s__                                                 | 1.50E-06 | 3.20E+00 | 6.12E-01 |
| New.ReferenceOTU468            | k__Bacteria;p__Verrucomicrobia;c__Verruco-5;o__WCHB1-41;f__RFP12;g__s__                                            | 1.56E-06 | 3.24E-01 | 1.78E+00 |
| New.ReferenceOTU754            | Unassigned                                                                                                         | 1.57E-06 | 7.18E-01 | 3.09E+00 |
| 215468                         | k__Bacteria;p__Firmicutes;c__Clostridia;o__Clostridiales;f__Ruminococcaceae;g__s__                                 | 1.68E-06 | 1.13E-01 | 1.25E+00 |

|                     |                                                                                                           |          |          |          |
|---------------------|-----------------------------------------------------------------------------------------------------------|----------|----------|----------|
| 208949              | k_Bacteria;p_Bacteroidetes;c_Bacteroidia;o_Bacteroidales;f_Bacteroidaceae;g_Bacteroides;s__               | 1.74E-06 | 1.30E+00 | 1.88E+01 |
| New.ReferenceOTU163 | k_Bacteria;p_Firmicutes;c_Clostridia;o_Clostridiales;f_Ruminococcaceae;g__;s__                            | 1.75E-06 | 1.42E+00 | 7.46E+02 |
| 291412              | k_Bacteria;p_Bacteroidetes;c_Bacteroidia;o_Bacteroidales;f__;g__;s__                                      | 1.81E-06 | 1.97E+00 | 5.54E+00 |
| New.ReferenceOTU31  | k_Bacteria;p_Firmicutes;c_Clostridia;o_Clostridiales;f_Lachnospiraceae;g__Blautia;s__producta             | 1.81E-06 | 7.32E+01 | 0.00E+00 |
| 1066464             | k_Bacteria;p_Verrucomicrobia;c_Verruco-5;o_WCHB1-41;f_RFP12;g__;s__                                       | 1.88E-06 | 2.82E+01 | 1.90E+00 |
| 4425214             | k_Bacteria;p_Firmicutes;c_Bacilli;o_Lactobacillales;f_Streptococcaceae;g__Streptococcus;s__               | 1.89E-06 | 5.17E+00 | 5.52E+01 |
| New.ReferenceOTU788 | k_Bacteria;p_Firmicutes;c_Clostridia;o_Clostridiales                                                      | 1.95E-06 | 9.86E+02 | 1.10E+00 |
| 343633              | k_Bacteria;p_Actinobacteria;c_Coriobacteriia;o_Coriobacteriales;f_Coriobacteriaceae;g__;s__               | 1.98E-06 | 1.38E+00 | 5.30E+00 |
| 332718              | k_Bacteria;p_Firmicutes;c_Bacilli;o_Lactobacillales;f_Streptococcaceae;g__Streptococcus;s__               | 2.04E-06 | 6.03E+00 | 1.31E+00 |
| 360730              | k_Bacteria;p_Bacteroidetes;c_Bacteroidia;o_Bacteroidales;f_[Odoribacteraceae];g_Butyricimonas;s__         | 2.11E-06 | 4.59E+00 | 4.93E+01 |
| 297744              | k_Bacteria;p_Firmicutes;c_Clostridia;o_Clostridiales;f_[Mogibacteriaceae];g__;s__                         | 2.11E-06 | 5.21E+01 | 2.40E+00 |
| 290559              | k_Bacteria;p_Firmicutes;c_Clostridia;o_Clostridiales;f__;g__;s__                                          | 2.18E-06 | 6.48E+00 | 1.27E+01 |
| 3134492             | k_Bacteria;p_Firmicutes;c_Clostridia;o_Clostridiales;f_Lachnospiraceae;g__;s__                            | 2.20E-06 | 1.99E+00 | 7.16E+01 |
| 294370              | k_Bacteria;p_Firmicutes;c_Clostridia;o_Clostridiales;f_Lachnospiraceae;g__;s__                            | 2.22E-06 | 1.18E+01 | 1.48E+00 |
| 320221              | k_Bacteria;p_Firmicutes;c_Clostridia;o_Clostridiales                                                      | 2.27E-06 | 4.37E+01 | 2.57E+00 |
| 213401              | k_Bacteria;p_Firmicutes;c_Clostridia;o_Clostridiales;f__;g__;s__                                          | 2.34E-06 | 4.13E+00 | 2.09E+01 |
| 544996              | k_Bacteria;p_Firmicutes;c_Clostridia;o_Clostridiales;f_Ruminococcaceae;g__Oscillospira;s__                | 2.34E-06 | 3.08E+00 | 1.04E+01 |
| 191738              | k_Bacteria;p_Firmicutes;c_Clostridia;o_Clostridiales;f__;g__;s__                                          | 2.40E-06 | 4.77E+00 | 2.24E+01 |
| 4364405             | k_Bacteria;p_Firmicutes;c_Clostridia;o_Clostridiales;f_Ruminococcaceae;g__;s__                            | 2.47E-06 | 1.48E+01 | 3.73E+00 |
| 354652              | k_Bacteria;p_Bacteroidetes;c_Bacteroidia;o_Bacteroidales;f__;g__;s__                                      | 2.49E-06 | 1.59E+00 | 6.96E+00 |
| New.ReferenceOTU583 | k_Bacteria;p_Firmicutes;c_Bacilli;o_Lactobacillales;f_Lactobacillaceae;g__Lactobacillus;s__               | 2.58E-06 | 2.61E+00 | 3.13E+01 |
| 306056              | k_Bacteria;p_Firmicutes;c_Clostridia;o_Clostridiales;f__;g__;s__                                          | 2.61E-06 | 2.73E+00 | 6.96E+00 |
| 322729              | k_Bacteria;p_Firmicutes;c_Clostridia;o_Clostridiales;f_Ruminococcaceae;g__;s__                            | 2.66E-06 | 5.01E+00 | 1.76E+01 |
| New.ReferenceOTU455 | k_Bacteria;p_Firmicutes;c_Clostridia;o_Clostridiales;f_Christensenellaceae;g__;s__                        | 2.68E-06 | 3.10E+01 | 1.79E+00 |
| 289923              | k_Bacteria;p_Actinobacteria;c_Actinobacteria;o_Actinomycetales;f_Micrococcaceae;g_Arthrobacter;s__        | 2.72E-06 | 1.04E+01 | 1.07E+00 |
| 4450291             | k_Bacteria;p_Firmicutes;c_Clostridia;o_Clostridiales;f_Ruminococcaceae;g__;s__                            | 2.75E-06 | 3.38E+01 | 3.07E+00 |
| New.ReferenceOTU35  | k_Bacteria;p_Bacteroidetes;c_Bacteroidia;o_Bacteroidales;f__;g__;s__                                      | 2.89E-06 | 5.77E+01 | 3.69E+00 |
| 575557              | k_Bacteria;p_Firmicutes;c_Erysipelotrichi;o_Erysipelotrichales;f_Erysipelotrichaceae;g_Coprobaillus;s__   | 3.00E-06 | 3.03E+00 | 2.99E+02 |
| 525215              | k_Bacteria;p_Firmicutes;c_Clostridia;o_Clostridiales;f_Ruminococcaceae;g__Faecalibacterium;s__prausnitzii | 3.01E-06 | 4.32E+00 | 8.06E+01 |
| 290654              | k_Bacteria;p_Synergistetes;c_Synergistia;o_Synergistales;f_Synergistaceae;g__;s__                         | 3.16E-06 | 1.72E+00 | 6.96E+00 |
| 342085              | k_Bacteria;p_Firmicutes;c_Clostridia;o_Clostridiales;f_Lachnospiraceae;g__;s__                            | 3.17E-06 | 7.89E+00 | 2.09E+01 |
| 295853              | k_Bacteria;p_Firmicutes;c_Clostridia;o_Clostridiales;f_[Mogibacteriaceae];g__;s__                         | 3.19E-06 | 3.18E+00 | 6.13E+00 |

|                               |                                                                                                                       |          |          |          |
|-------------------------------|-----------------------------------------------------------------------------------------------------------------------|----------|----------|----------|
| 4365130                       | k__Bacteria;p__Bacteroidetes;c__Bacteroidia;o__Bacteroidales;f__Porphyromonadaceae;g__Parabacteroides;s__distasonis   | 3.21E-06 | 7.23E+00 | 6.87E-01 |
| New.ReferenceOTU659           | k__Bacteria;p__Firmicutes;c__Clostridia;o__Clostridiales;f__g__s__                                                    | 3.31E-06 | 9.44E-01 | 2.21E+00 |
| 312384                        | k__Bacteria;p__Verrucomicrobia;c__Verruco-5;o__WCHB1-41;f__RFP12;g__s__                                               | 3.33E-06 | 4.79E-01 | 2.51E+00 |
| 179067                        | k__Bacteria;p__Firmicutes;c__Clostridia;o__Clostridiales;f__Lachnospiraceae;g__Blautia;s__producta                    | 3.33E-06 | 4.30E+00 | 7.31E-01 |
| 344860                        | k__Bacteria;p__Firmicutes;c__Clostridia;o__Clostridiales;f__Christensenellaceae;g__s__                                | 3.33E-06 | 1.41E-01 | 2.34E+00 |
| 353775                        | k__Bacteria;p__Firmicutes;c__Clostridia;o__Clostridiales;f__Lachnospiraceae;g__s__                                    | 3.33E-06 | 6.20E-01 | 2.42E+00 |
| 150477                        | k__Archaea;p__Euryarchaeota;c__Methanobacteria;o__Methanobacteriales;f__Methanobacteriaceae;g__Methanosphaera;s__     | 3.33E-06 | 3.10E+00 | 1.79E-01 |
| 662852                        | k__Bacteria;p__Firmicutes;c__Clostridia;o__Clostridiales;f__g__s__                                                    | 3.38E-06 | 5.46E+00 | 1.20E+01 |
| 351095                        | k__Bacteria;p__Firmicutes;c__Clostridia;o__Clostridiales;f__Lachnospiraceae                                           | 3.43E-06 | 8.03E-01 | 0.00E+00 |
| 294246                        | k__Bacteria;p__Firmicutes;c__Clostridia;o__Clostridiales;f__Ruminococcaceae;g__s__                                    | 3.43E-06 | 1.65E+01 | 2.00E+00 |
| 2264288                       | k__Bacteria;p__Firmicutes;c__Bacilli;o__Lactobacillales;f__Carnobacteriaceae;g__Desemzia;s__                          | 3.46E-06 | 4.07E+00 | 1.64E-01 |
| 554463                        | k__Bacteria;p__Firmicutes;c__Clostridia;o__Clostridiales;f__Ruminococcaceae;g__s__                                    | 3.49E-06 | 2.11E-01 | 2.60E+00 |
| 4437748                       | k__Bacteria;p__Firmicutes;c__Clostridia;o__Clostridiales;f__g__s__                                                    | 3.49E-06 | 9.72E-01 | 0.00E+00 |
| 265563                        | k__Bacteria;p__Firmicutes;c__Clostridia;o__Clostridiales;f__Lachnospiraceae;g__Dorea;s__                              | 3.49E-06 | 1.79E+00 | 2.09E-01 |
| 106258                        | k__Bacteria;p__Firmicutes;c__Clostridia;o__Clostridiales;f__g__s__                                                    | 3.49E-06 | 2.06E+00 | 0.00E+00 |
| 110836                        | k__Bacteria;p__Firmicutes;c__Clostridia;o__Clostridiales;f__Ruminococcaceae;g__s__                                    | 3.53E-06 | 1.04E+00 | 3.12E+00 |
| 126                           | k__Archaea;p__Euryarchaeota;c__Methanobacteria;o__Methanobacteriales;f__Methanobacteriaceae;g__Methanobrevibacter;s__ | 3.53E-06 | 2.01E+01 | 4.33E-01 |
| 351773                        | k__Bacteria;p__Firmicutes;c__Clostridia;o__Clostridiales;f__Ruminococcaceae;g__s__                                    | 3.54E-06 | 5.07E-01 | 2.06E+00 |
| 296516                        | k__Bacteria;p__Firmicutes;c__Clostridia;o__Clostridiales;f__Lachnospiraceae;g__s__                                    | 3.81E-06 | 3.35E+00 | 6.06E+00 |
| New.CleanUp.ReferenceOTU53482 | k__Bacteria;p__Firmicutes;c__Clostridia;o__Clostridiales;f__Lachnospiraceae;g__s__                                    | 3.84E-06 | 2.82E-02 | 1.25E+00 |
| New.ReferenceOTU528           | k__Bacteria;p__Firmicutes;c__Clostridia;o__Clostridiales;f__g__s__                                                    | 3.87E-06 | 8.87E-01 | 4.54E+00 |
| New.ReferenceOTU622           | k__Bacteria;p__Firmicutes;c__Clostridia;o__Clostridiales;f__Ruminococcaceae;g__s__                                    | 3.88E-06 | 2.27E+01 | 4.76E+01 |
| 4446741                       | k__Bacteria;p__Firmicutes;c__Clostridia;o__Clostridiales;f__Lachnospiraceae;g__s__                                    | 3.96E-06 | 7.46E-01 | 2.52E+00 |
| 340960                        | k__Bacteria;p__Firmicutes;c__Bacilli;o__Lactobacillales;f__Lactobacillaceae;g__Lactobacillus;s__                      | 3.98E-06 | 5.94E+00 | 6.42E-01 |
| 4449427                       | k__Bacteria;p__Firmicutes;c__Clostridia;o__Clostridiales;f__Lachnospiraceae;g__[Ruminococcus];s__                     | 3.98E-06 | 4.00E+00 | 2.09E-01 |
| 367176                        | k__Bacteria;p__Firmicutes;c__Clostridia;o__Clostridiales;f__Ruminococcaceae;g__Oscillospira;s__                       | 3.98E-06 | 1.07E+00 | 5.97E-02 |
| 346761                        | k__Bacteria;p__Firmicutes;c__Clostridia;o__Clostridiales;f__Ruminococcaceae;g__s__                                    | 3.98E-06 | 2.52E+00 | 3.58E-01 |
| 293994                        | k__Bacteria;p__Firmicutes;c__Erysipelotrichi;o__Erysipelotrichales;f__Erysipelotrichaceae;g__p-75-a5;s__              | 3.98E-06 | 9.15E-01 | 2.48E+00 |
| 667010                        | k__Bacteria;p__Firmicutes;c__Clostridia;o__Clostridiales;f__g__s__                                                    | 4.12E-06 | 1.72E+00 | 1.20E+01 |
| 887025                        | k__Bacteria;p__Firmicutes;c__Clostridia;o__Clostridiales;f__Ruminococcaceae;g__s__                                    | 4.15E-06 | 7.18E-01 | 2.01E+00 |
| New.ReferenceOTU531           | k__Bacteria;p__Firmicutes;c__Clostridia;o__Clostridiales;f__Lachnospiraceae                                           | 4.21E-06 | 1.08E+00 | 4.48E-02 |
| 299508                        | k__Bacteria;p__Firmicutes;c__Clostridia;o__Clostridiales;f__Veillonellaceae;g__s__                                    | 4.23E-06 | 7.89E-01 | 2.87E+00 |

|                                |                                                                                                   |          |          |          |
|--------------------------------|---------------------------------------------------------------------------------------------------|----------|----------|----------|
| 297408                         | k_Bacteria;p_Verrucomicrobia;c_Verruco-5;o_WCHB1-41;f_RFP12;g_;s_                                 | 4.48E-06 | 4.51E-01 | 2.55E+00 |
| 196249                         | k_Bacteria;p_Firmicutes;c_Clostridia;o_Clostridiales;f_Lachnospiraceae;g_Dorea;s_                 | 4.51E-06 | 1.01E+00 | 4.48E-02 |
| 289096                         | k_Bacteria;p_Spirochaetes;c_Spirochaetes;o_Spirochaetales;f_Spirochaetaceae;g_Treponema;s_        | 4.54E-06 | 2.68E-01 | 2.06E+00 |
| 332290                         | k_Bacteria;p_Bacteroidetes;c_Bacteroidia;o_Bacteroidales;f_;g_;s_                                 | 4.58E-06 | 1.83E-01 | 2.13E+00 |
| 309195                         | k_Bacteria;p_Firmicutes;c_Clostridia;o_Clostridiales;f_Lachnospiraceae;g_;s_                      | 4.71E-06 | 7.18E-01 | 2.51E+00 |
| 313400                         | k_Bacteria;p_Firmicutes;c_Clostridia;o_Clostridiales;f_;g_;s_                                     | 4.75E-06 | 6.01E+00 | 2.83E+01 |
| 539647                         | k_Bacteria;p_Firmicutes;c_Bacilli;o_Lactobacillales;f_Lactobacillaceae;g_Lactobacillus;s_         | 4.76E-06 | 7.45E+00 | 2.28E+00 |
| 4446320                        | k_Bacteria;p_Firmicutes;c_Clostridia;o_Clostridiales;f_Clostridiaceae;g_;s_                       | 4.87E-06 | 1.27E-01 | 8.27E+00 |
| 4456605                        | k_Bacteria;p_Firmicutes;c_Clostridia;o_Clostridiales;f_Lachnospiraceae;g_;s_                      | 4.87E-06 | 5.35E-01 | 2.27E+00 |
| New.CleanUp.ReferenceOTU130624 | k_Bacteria;p_Firmicutes;c_Clostridia;o_Clostridiales;f_Lachnospiraceae;g_;s_                      | 4.92E-06 | 1.41E-02 | 5.54E+00 |
| 293147                         | k_Bacteria;p_Firmicutes;c_Clostridia;o_Clostridiales;f_Ruminococcaceae;g_;s_                      | 5.11E-06 | 4.23E-02 | 1.43E+00 |
| 2123717                        | k_Bacteria;p_Firmicutes;c_Clostridia;o_Clostridiales;f_Lachnospiraceae;g_Roseburia;s_             | 5.14E-06 | 2.58E+00 | 1.37E+00 |
| New.CleanUp.ReferenceOTU39107  | k_Bacteria;p_Firmicutes;c_Clostridia;o_Clostridiales;f_Lachnospiraceae;g_;s_                      | 5.18E-06 | 1.06E+00 | 2.99E-02 |
| 269913                         | k_Bacteria;p_Firmicutes;c_Clostridia;o_Clostridiales;f_Ruminococcaceae;g_;s_                      | 5.54E-06 | 1.69E+00 | 6.61E+00 |
| 301226                         | k_Bacteria;p_Firmicutes;c_Clostridia;o_Clostridiales;f_Clostridiaceae;g_;s_                       | 5.54E-06 | 7.63E+00 | 1.69E+00 |
| 317818                         | k_Bacteria;p_Firmicutes;c_Clostridia;o_Clostridiales;f_Lachnospiraceae;g_;s_                      | 5.54E-06 | 1.85E+00 | 4.40E+00 |
| 577170                         | k_Bacteria;p_Bacteroidetes;c_Bacteroidia;o_Bacteroidales;f_Bacteroidaceae;g_Bacteroides;s_        | 6.11E-06 | 3.01E+00 | 3.88E-01 |
| 304909                         | k_Bacteria;p_Bacteroidetes;c_Bacteroidia;o_Bacteroidales;f_;g_;s_                                 | 6.60E-06 | 9.86E-01 | 3.85E+00 |
| 328617                         | k_Bacteria;p_Bacteroidetes;c_Bacteroidia;o_Bacteroidales;f_Bacteroidaceae;g_Bacteroides           | 6.60E-06 | 7.44E+00 | 3.42E+00 |
| New.CleanUp.ReferenceOTU125526 | k_Bacteria;p_Firmicutes;c_Clostridia;o_Clostridiales;f_Christensenellaceae;g_;s_                  | 6.74E-06 | 5.63E-01 | 3.58E+00 |
| 299176                         | k_Bacteria;p_Actinobacteria;c_Actinobacteria;o_Actinomycetales;f_Micrococcaceae;g_Arthrobacter;s_ | 7.15E-06 | 1.20E+01 | 1.43E+00 |
| 317813                         | k_Bacteria;p_Firmicutes;c_Clostridia;o_Clostridiales;f_Ruminococcaceae;g_;s_                      | 7.21E-06 | 3.30E+00 | 6.97E+00 |
| 297576                         | k_Bacteria;p_Bacteroidetes;c_Bacteroidia;o_Bacteroidales;f_;g_;s_                                 | 7.25E-06 | 1.83E-01 | 1.69E+00 |
| New.ReferenceOTU187            | k_Bacteria;p_Verrucomicrobia;c_Verruco-5;o_WCHB1-41;f_RFP12;g_;s_                                 | 7.33E-06 | 7.46E-01 | 2.64E+00 |
| 320847                         | k_Bacteria;p_Bacteroidetes;c_Bacteroidia;o_Bacteroidales;f_;g_;s_                                 | 7.44E-06 | 1.52E+00 | 4.13E+00 |
| 290804                         | k_Bacteria;p_Actinobacteria;c_Coriobacteriia;o_Coriobacteriales;f_Coriobacteriaceae;g_;s_         | 7.56E-06 | 1.10E+01 | 9.85E-01 |
| 301640                         | k_Bacteria;p_Firmicutes;c_Clostridia;o_Clostridiales;f_;g_;s_                                     | 8.19E-06 | 2.52E+00 | 1.07E+01 |
| 348065                         | k_Bacteria;p_Firmicutes;c_Clostridia;o_Clostridiales;f_;g_;s_                                     | 8.25E-06 | 1.83E+00 | 1.49E-01 |
| 110579                         | k_Bacteria;p_Firmicutes;c_Clostridia;o_Clostridiales;f_[Mogibacteriaceae];g_;s_                   | 8.35E-06 | 1.41E+00 | 4.48E-02 |
| 192244                         | k_Bacteria;p_Firmicutes;c_Clostridia;o_Clostridiales;f_Ruminococcaceae;g_;s_                      | 8.38E-06 | 1.94E+00 | 2.99E-01 |
| 133892                         | k_Bacteria;p_Firmicutes;c_Bacilli;o_Lactobacillales;f_Lactobacillaceae;g_Lactobacillus;s_         | 8.46E-06 | 2.72E+00 | 2.24E-01 |
| 191476                         | k_Bacteria;p_Firmicutes;c_Clostridia;o_Clostridiales;f_Lachnospiraceae;g_[Ruminococcus];s_gnavus  | 8.84E-06 | 2.70E+00 | 1.49E-01 |



|                                |                                                                                                             |          |          |          |
|--------------------------------|-------------------------------------------------------------------------------------------------------------|----------|----------|----------|
| New.ReferenceOTU168            | k__Bacteria;p__Firmicutes;c__Clostridia;o__Clostridiales;f__Ruminococcaceae;g__s__                          | 9.11E-06 | 1.83E-01 | 1.16E+00 |
| 295444                         | k__Bacteria;p__Firmicutes;c__Clostridia;o__Clostridiales;f__Lachnospiraceae;g__s__                          | 9.28E-06 | 2.54E-01 | 3.45E+00 |
| 330285                         | k__Bacteria;p__Firmicutes;c__Clostridia;o__Clostridiales;f__Ruminococcaceae;g__s__                          | 9.45E-06 | 4.80E+00 | 1.13E+00 |
| New.ReferenceOTU651            | k__Bacteria;p__Firmicutes;c__Clostridia;o__Clostridiales;f__Lachnospiraceae;g__s__                          | 9.58E-06 | 8.31E-01 | 2.39E+00 |
| 346457                         | k__Bacteria;p__Firmicutes;c__Clostridia;o__Clostridiales;f__g__s__                                          | 9.60E-06 | 3.10E-01 | 1.54E+00 |
| 619919                         | k__Bacteria;p__Firmicutes;c__Clostridia;o__Clostridiales;f__g__s__                                          | 9.60E-06 | 2.92E+00 | 6.45E+00 |
| 17311                          | k__Bacteria;p__Firmicutes;c__Clostridia;o__Clostridiales;f__Christensenellaceae;g__s__                      | 9.66E-06 | 1.32E+00 | 1.34E-01 |
| New.CleanUp.ReferenceOTU127362 | k__Bacteria;p__Firmicutes;c__Clostridia;o__Clostridiales;f__Christensenellaceae;g__s__                      | 9.73E-06 | 9.58E-01 | 4.48E-02 |
| 652823                         | k__Bacteria;p__Firmicutes;c__Clostridia;o__Clostridiales;f__Ruminococcaceae;g__s__                          | 9.80E-06 | 4.79E+00 | 3.58E-01 |
| 299047                         | k__Bacteria;p__Firmicutes;c__Clostridia;o__Clostridiales;f__Dehalobacteriaceae;g__s__                       | 9.80E-06 | 1.51E+01 | 2.45E+01 |
| 3943182                        | k__Bacteria;p__Bacteroidetes;c__Bacteroidia;o__Bacteroidales;f__Bacteroidaceae;g__Bacteroides;s__           | 9.80E-06 | 1.87E+00 | 5.97E-02 |
| 332860                         | k__Bacteria;p__Firmicutes;c__Clostridia;o__Clostridiales;f__Ruminococcaceae;g__s__                          | 1.01E-05 | 2.39E-01 | 1.51E+00 |
| 232222                         | k__Bacteria;p__Firmicutes;c__Clostridia;o__Clostridiales;f__Ruminococcaceae;g__s__                          | 1.01E-05 | 2.49E+00 | 1.49E-01 |
| New.ReferenceOTU807            | k__Bacteria;p__Firmicutes;c__Clostridia;o__Clostridiales;f__Ruminococcaceae;g__s__                          | 1.09E-05 | 2.82E-02 | 3.10E+00 |
| 352192                         | k__Bacteria;p__Firmicutes;c__Clostridia;o__Clostridiales;f__g__s__                                          | 1.10E-05 | 4.23E-02 | 3.51E+00 |
| 336874                         | k__Bacteria;p__Bacteroidetes;c__Bacteroidia;o__Bacteroidales;f__g__s__                                      | 1.11E-05 | 1.20E+00 | 3.43E+00 |
| 555595                         | k__Bacteria;p__Firmicutes;c__Clostridia;o__Clostridiales;f__Ruminococcaceae;g__s__                          | 1.11E-05 | 2.76E+00 | 7.70E+00 |
| 316357                         | k__Bacteria;p__Firmicutes;c__Clostridia;o__Clostridiales;f__Lachnospiraceae;g__s__                          | 1.14E-05 | 3.38E-01 | 2.60E+00 |
| 99173                          | k__Bacteria;p__Firmicutes;c__Clostridia;o__Clostridiales;f__Lachnospiraceae;g__Coprococcus;s__              | 1.16E-05 | 1.38E+00 | 7.10E+00 |
| 197072                         | k__Bacteria;p__Bacteroidetes;c__Bacteroidia;o__Bacteroidales;f__Bacteroidaceae;g__Bacteroides;s__           | 1.17E-05 | 1.61E+00 | 2.84E-01 |
| 350224                         | k__Bacteria;p__Firmicutes;c__Clostridia;o__Clostridiales;f__Ruminococcaceae;g__Ruminococcus;s__flavifaciens | 1.22E-05 | 1.59E+00 | 0.00E+00 |
| New.ReferenceOTU262            | k__Bacteria;p__Bacteroidetes;c__Bacteroidia;o__Bacteroidales;f__g__s__                                      | 1.27E-05 | 1.97E-01 | 1.42E+00 |
| 297914                         | k__Bacteria;p__Bacteroidetes;c__Bacteroidia;o__Bacteroidales;f__g__s__                                      | 1.27E-05 | 2.11E-01 | 1.16E+00 |
| New.CleanUp.ReferenceOTU158319 | k__Bacteria;p__Firmicutes;c__Clostridia;o__Clostridiales;f__Ruminococcaceae;g__Ruminococcus;s__             | 1.28E-05 | 1.69E-01 | 1.72E+00 |
| 2235671                        | k__Bacteria;p__Firmicutes;c__Clostridia;o__Clostridiales;f__Lachnospiraceae;g__Blautia;s__producta          | 1.29E-05 | 2.25E+00 | 1.49E-02 |
| New.CleanUp.ReferenceOTU6013   | k__Bacteria;p__Bacteroidetes;c__Bacteroidia;o__Bacteroidales;f__g__s__                                      | 1.32E-05 | 2.11E-01 | 1.12E+00 |
| 325850                         | k__Bacteria;p__Proteobacteria;c__Alphaproteobacteria;o__RF32;f__g__s__                                      | 1.39E-05 | 4.11E+00 | 3.58E-01 |
| 4427335                        | k__Bacteria;p__Firmicutes;c__Clostridia;o__Clostridiales;f__g__s__                                          | 1.40E-05 | 2.68E-01 | 2.90E+00 |
| 569824                         | k__Bacteria;p__Firmicutes;c__Clostridia;o__Clostridiales;f__Ruminococcaceae;g__s__                          | 1.40E-05 | 5.92E-01 | 2.24E+00 |
| New.ReferenceOTU787            | k__Bacteria;p__Verrucomicrobia;c__Verruco-5;o__WCHB1-41;f__RFP12;g__s__                                     | 1.44E-05 | 1.52E+00 | 4.39E+00 |
| 665703                         | k__Bacteria;p__Firmicutes;c__Clostridia;o__Clostridiales;f__g__s__                                          | 1.44E-05 | 7.76E+00 | 7.61E-01 |
| New.CleanUp.ReferenceOTU96704  | k__Bacteria;p__Firmicutes;c__Clostridia;o__Clostridiales;f__g__s__                                          | 1.49E-05 | 2.14E+00 | 4.18E-01 |

|                                |                                                                                                  |          |          |          |
|--------------------------------|--------------------------------------------------------------------------------------------------|----------|----------|----------|
| 287496                         | k_Bacteria;p_Firmicutes;c_Clostridia;o_Clostridiales;f_Ruminococcaceae;g____;s__                 | 1.50E-05 | 1.70E+00 | 5.49E+00 |
| 4395096                        | k_Bacteria;p_Bacteroidetes;c_Bacteroidia;o_Bacteroidales;f_Bacteroidaceae;g_Bacteroides;s_ovatus | 1.52E-05 | 1.34E+00 | 2.99E+01 |
| 918313                         | k_Bacteria;p_Firmicutes;c_Clostridia;o_Clostridiales;f_g____;s__                                 | 1.59E-05 | 9.86E-02 | 1.94E+00 |
| New.ReferenceOTU868            | k_Bacteria;p_Bacteroidetes;c_Bacteroidia;o_Bacteroidales;f_g____;s__                             | 1.59E-05 | 2.39E-01 | 1.87E+00 |
| 837396                         | k_Bacteria;p_Firmicutes;c_Clostridia;o_Clostridiales;f_g____;s__                                 | 1.62E-05 | 1.10E+00 | 4.43E+00 |
| 299778                         | k_Bacteria;p_Bacteroidetes;c_Bacteroidia;o_Bacteroidales;f_Porphyromonadaceae;g_Paludibacter;s__ | 1.63E-05 | 2.11E-01 | 2.39E+00 |
| 336836                         | k_Bacteria;p_Firmicutes;c_Clostridia;o_Clostridiales;f_g____;s__                                 | 1.64E-05 | 1.38E+01 | 2.09E+01 |
| 91359                          | k_Bacteria;p_Firmicutes;c_Clostridia;o_Clostridiales;f_Lachnospiraceae;g_Lachnospira;s__         | 1.66E-05 | 3.06E+00 | 8.96E+02 |
| 105434                         | k_Bacteria;p_Firmicutes;c_Clostridia;o_Clostridiales;f_g____;s__                                 | 1.67E-05 | 3.52E-01 | 1.63E+00 |
| New.ReferenceOTU143            | k_Bacteria;p_Bacteroidetes;c_Bacteroidia;o_Bacteroidales;f_g____;s__                             | 1.69E-05 | 5.63E-02 | 1.00E+00 |
| 2985051                        | k_Bacteria;p_Actinobacteria;c_Coriobacteriia;o_Coriobacteriales;f_Coriobacteriaceae;g____;s__    | 1.69E-05 | 2.35E+00 | 1.34E+01 |
| New.CleanUp.ReferenceOTU20812  | k_Bacteria;p_Firmicutes;c_Clostridia;o_Clostridiales;f_Ruminococcaceae;g____;s__                 | 1.72E-05 | 1.83E-01 | 7.46E-01 |
| 111771                         | k_Bacteria;p_Firmicutes;c_Clostridia;o_Clostridiales;f_g____;s__                                 | 1.72E-05 | 1.32E+00 | 1.49E-01 |
| 208802                         | k_Bacteria;p_Firmicutes;c_Clostridia;o_Clostridiales;f_Christensenellaceae;g____;s__             | 1.73E-05 | 1.24E+01 | 6.69E+00 |
| 36226                          | k_Bacteria;p_Firmicutes;c_Clostridia;o_Clostridiales;f_Clostridiaceae;g____;s__                  | 1.74E-05 | 9.10E+00 | 1.69E+00 |
| New.ReferenceOTU481            | k_Bacteria;p_Firmicutes;c_Clostridia;o_Clostridiales;f_[Mogibacteriaceae];g____;s__              | 1.80E-05 | 2.86E+00 | 2.09E-01 |
| 300646                         | k_Bacteria;p_Firmicutes;c_Clostridia;o_Clostridiales;f_g____;s__                                 | 1.81E-05 | 1.23E+00 | 3.99E+00 |
| 819353                         | k_Bacteria;p_Firmicutes;c_Clostridia;o_Clostridiales;f_Ruminococcaceae;g____;s__                 | 1.81E-05 | 1.06E+01 | 3.25E+00 |
| 289070                         | k_Bacteria;p_Spirochaetes;c_Spirochaetes;o_Spirochaetales;f_Spirochaetaceae;g_Treponema;s__      | 1.81E-05 | 3.94E-01 | 2.19E+00 |
| 110060                         | k_Bacteria;p_Firmicutes;c_Clostridia;o_Clostridiales;f_Ruminococcaceae;g____;s__                 | 1.81E-05 | 4.30E+00 | 9.10E-01 |
| 308884                         | k_Bacteria;p_Firmicutes;c_Clostridia;o_Clostridiales;f_g____;s__                                 | 1.92E-05 | 1.41E-02 | 1.51E+00 |
| 317515                         | k_Bacteria;p_Firmicutes;c_Clostridia;o_Clostridiales;f_g____;s__                                 | 1.96E-05 | 7.00E+00 | 3.03E+00 |
| 178845                         | k_Bacteria;p_Firmicutes;c_Clostridia;o_Clostridiales;f_Ruminococcaceae;g____;s__                 | 1.96E-05 | 1.18E+01 | 7.61E-01 |
| 327635                         | k_Bacteria;p_Firmicutes;c_Clostridia;o_Clostridiales;f_g____;s__                                 | 1.97E-05 | 5.78E+01 | 8.54E+01 |
| New.ReferenceOTU783            | k_Bacteria;p_WPS-2;c_o____;f_g____;s__                                                           | 1.98E-05 | 1.41E-02 | 3.61E+00 |
| 287689                         | k_Bacteria;p_Firmicutes;c_Clostridia;o_Clostridiales;f_Lachnospiraceae;g____;s__                 | 1.99E-05 | 2.25E-01 | 1.76E+00 |
| 301381                         | k_Bacteria;p_Spirochaetes;c_Spirochaetes;o_Spirochaetales;f_Spirochaetaceae;g_Treponema;s__      | 2.05E-05 | 1.46E+00 | 1.17E+01 |
| 4397737                        | k_Bacteria;p_Firmicutes;c_Clostridia;o_Clostridiales;f_Lachnospiraceae;g_Blautia                 | 2.11E-05 | 1.99E+00 | 0.00E+00 |
| New.ReferenceOTU749            | k_Bacteria;p_Firmicutes;c_Clostridia;o_Clostridiales;f_g____;s__                                 | 2.15E-05 | 5.49E+00 | 1.75E+00 |
| 4331760                        | k_Bacteria;p_Bacteroidetes;c_Bacteroidia;o_Bacteroidales;f_Rikenellaceae;g____;s__               | 2.17E-05 | 2.21E+00 | 2.09E-01 |
| New.CleanUp.ReferenceOTU154152 | k_Bacteria;p_Firmicutes;c_Clostridia;o_Clostridiales;f_g____;s__                                 | 2.17E-05 | 3.11E+00 | 0.00E+00 |
| 306785                         | k_Bacteria;p_Firmicutes;c_Clostridia;o_Clostridiales;f_g____;s__                                 | 2.19E-05 | 2.10E+00 | 4.94E+00 |

|                                |                                                                                                          |          |          |          |
|--------------------------------|----------------------------------------------------------------------------------------------------------|----------|----------|----------|
| 365574                         | k__Bacteria;p__Firmicutes;c__Clostridia;o__Clostridiales;f__Lachnospiraceae;g__Blautia;s__               | 2.22E-05 | 2.82E-01 | 1.57E+00 |
| New.ReferenceOTU906            | k__Bacteria;p__Firmicutes;c__Clostridia;o__Clostridiales;f__;g__;s__                                     | 2.22E-05 | 1.83E+00 | 6.33E+00 |
| New.CleanUp.ReferenceOTU125682 | k__Bacteria;p__Bacteroidetes;c__Bacteroidia;o__Bacteroidales;f__;g__;s__                                 | 2.22E-05 | 4.23E-02 | 1.57E+00 |
| 295654                         | k__Bacteria;p__Firmicutes;c__Bacilli;o__Lactobacillales;f__Lactobacillaceae;g__Lactobacillus;s__         | 2.22E-05 | 1.20E+01 | 3.28E+00 |
| 342703                         | k__Bacteria;p__Firmicutes;c__Clostridia;o__Clostridiales;f__Ruminococcaceae;g__;s__                      | 2.24E-05 | 4.35E+00 | 2.99E+02 |
| 1066830                        | k__Bacteria;p__Firmicutes;c__Clostridia;o__Clostridiales;f__Ruminococcaceae;g__;s__                      | 2.25E-05 | 1.80E+01 | 4.25E+00 |
| 4464445                        | k__Bacteria;p__Firmicutes;c__Clostridia;o__Clostridiales;f__Lachnospiraceae;g__;s__                      | 2.29E-05 | 1.07E+00 | 1.49E+02 |
| 347783                         | k__Bacteria;p__Actinobacteria;c__Coriobacteriia;o__Coriobacteriales;f__Coriobacteriaceae;g__Slackia;s__  | 2.30E-05 | 5.05E+01 | 1.23E+01 |
| New.ReferenceOTU180            | k__Bacteria;p__Firmicutes;c__Clostridia;o__Clostridiales;f__;g__;s__                                     | 2.42E-05 | 2.96E-01 | 1.67E+00 |
| 292493                         | k__Bacteria;p__Firmicutes;c__Clostridia;o__Clostridiales;f__;g__;s__                                     | 2.42E-05 | 5.37E+01 | 9.64E+00 |
| 300038                         | k__Bacteria;p__Verrucomicrobia;c__Verruco-5;o__WCHB1-41;f__RFP12;g__;s__                                 | 2.48E-05 | 7.04E-02 | 1.21E+00 |
| 1140223                        | k__Bacteria;p__Firmicutes;c__Bacilli;o__Lactobacillales;f__Streptococcaceae;g__Streptococcus;s__         | 2.49E-05 | 8.66E+00 | 1.82E+00 |
| 4307897                        | k__Bacteria;p__Firmicutes;c__Bacilli;o__Lactobacillales;f__Streptococcaceae;g__Streptococcus;s__         | 2.52E-05 | 6.63E+00 | 2.09E+01 |
| 331392                         | k__Bacteria;p__Firmicutes;c__Clostridia;o__Clostridiales;f__Clostridiaceae;g__Clostridium;s__            | 2.56E-05 | 1.72E+00 | 1.35E+01 |
| 291431                         | k__Bacteria;p__Firmicutes;c__Erysipelotrichi;o__Erysipelotrichales;f__Erysipelotrichaceae;g__p-75-a5;s__ | 2.57E-05 | 2.11E-01 | 1.34E+00 |
| 301498                         | k__Bacteria;p__Firmicutes;c__Clostridia;o__Clostridiales;f__Lachnospiraceae;g__;s__                      | 2.60E-05 | 7.27E+00 | 8.66E-01 |
| 289493                         | k__Bacteria;p__Firmicutes;c__Clostridia;o__Clostridiales;f__Lachnospiraceae;g__;s__                      | 2.68E-05 | 7.04E-02 | 1.00E+00 |
| New.CleanUp.ReferenceOTU49837  | k__Bacteria;p__Firmicutes;c__Clostridia;o__Clostridiales;f__Ruminococcaceae;g__;s__                      | 2.75E-05 | 2.82E-02 | 5.22E-01 |
| New.ReferenceOTU55             | k__Bacteria;p__Firmicutes;c__Clostridia;o__Clostridiales;f__Lachnospiraceae;g__Coprococcus;s__           | 2.90E-05 | 1.77E+00 | 5.82E-01 |
| 649107                         | k__Bacteria;p__Firmicutes;c__Clostridia;o__Clostridiales;f__);g__);s__                                   | 2.94E-05 | 1.31E+01 | 1.69E+01 |
| 798164                         | k__Bacteria;p__Firmicutes;c__Clostridia;o__Clostridiales;f__);g__);s__                                   | 2.95E-05 | 1.13E-01 | 1.49E+00 |
| New.ReferenceOTU395            | k__Bacteria;p__Bacteroidetes;c__Bacteroidia;o__Bacteroidales;f__Prevotellaceae;g__Prevotella;s__         | 3.01E-05 | 3.82E+00 | 1.79E-01 |
| 298108                         | k__Bacteria;p__Firmicutes;c__Clostridia;o__Clostridiales;f__Lachnospiraceae;g__);s__                     | 3.13E-05 | 4.79E-01 | 2.93E+00 |
| 293682                         | k__Bacteria;p__Verrucomicrobia;c__Verruco-5;o__WCHB1-41;f__RFP12;g__);s__                                | 3.16E-05 | 8.45E-01 | 2.90E+00 |
| New.ReferenceOTU64             | k__Bacteria;p__Firmicutes;c__Clostridia;o__Clostridiales;f__);g__);s__                                   | 3.20E-05 | 5.92E-01 | 8.57E+00 |
| 328238                         | k__Bacteria;p__Firmicutes;c__Clostridia;o__Clostridiales;f__);g__);s__                                   | 3.25E-05 | 5.92E-01 | 2.28E+00 |
| 4256470                        | k__Bacteria;p__Bacteroidetes;c__Bacteroidia;o__Bacteroidales;f__Bacteroidaceae;g__Bacteroides;s__        | 3.37E-05 | 5.96E+00 | 1.49E+00 |
| 189920                         | k__Bacteria;p__Bacteroidetes;c__Bacteroidia;o__Bacteroidales;f__Bacteroidaceae;g__Bacteroides;s__        | 3.37E-05 | 2.65E+00 | 6.72E-01 |
| 292128                         | k__Bacteria;p__Firmicutes;c__Clostridia;o__Clostridiales;f__[Mogibacteriaceae];g__Mogibacterium;s__      | 3.41E-05 | 4.23E+01 | 7.10E+01 |
| 185884                         | k__Bacteria;p__Firmicutes;c__Clostridia;o__Clostridiales;f__Lachnospiraceae;g__Blautia;s__producta       | 3.55E-05 | 1.08E+00 | 1.79E-01 |
| 331116                         | k__Bacteria;p__Firmicutes;c__Clostridia;o__Clostridiales;f__Lachnospiraceae;g__);s__                     | 3.68E-05 | 2.49E+00 | 4.33E-01 |
| 563591                         | k__Bacteria;p__Firmicutes;c__Clostridia;o__Clostridiales;f__Lachnospiraceae;g__);s__                     | 3.70E-05 | 0.00E+00 | 3.40E+00 |

|                                |                                                                                                                      |          |          |          |
|--------------------------------|----------------------------------------------------------------------------------------------------------------------|----------|----------|----------|
| New.CleanUp.ReferenceOTU104722 | k__Bacteria;p__Firmicutes;c__Clostridia;o__Clostridiales;f__g__s__                                                   | 3.76E-05 | 0.00E+00 | 1.36E+00 |
| 295527                         | k__Bacteria;p__Firmicutes;c__Clostridia;o__Clostridiales;f__g__s__                                                   | 3.82E-05 | 9.87E+00 | 2.25E+01 |
| New.ReferenceOTU175            | k__Bacteria;p__Firmicutes;c__Clostridia;o__Clostridiales;f__Lachnospiraceae;g__Coprococcus;s__                       | 3.88E-05 | 1.68E+00 | 1.64E+01 |
| 351498                         | k__Bacteria;p__Firmicutes;c__Clostridia;o__Clostridiales;f__[Mogibacteriaceae];g__s__                                | 4.00E-05 | 4.65E+01 | 2.88E+00 |
| 359533                         | k__Bacteria;p__Actinobacteria;c__Actinobacteria;o__Actinomycetales;f__Corynebacteriaceae;g__Corynebacterium;s__      | 4.01E-05 | 2.68E+00 | 1.94E+01 |
| New.CleanUp.ReferenceOTU50244  | k__Bacteria;p__Firmicutes;c__Clostridia;o__Clostridiales                                                             | 4.01E-05 | 7.75E+01 | 0.00E+00 |
| 337167                         | k__Bacteria;p__Firmicutes;c__Clostridia;o__Clostridiales;f__Ruminococcaceae;g__s__                                   | 4.03E-05 | 3.13E+00 | 7.67E+00 |
| 335759                         | k__Bacteria;p__Firmicutes;c__Clostridia;o__Clostridiales;f__Clostridiaceae;g__s__                                    | 4.04E-05 | 1.62E+00 | 3.54E+00 |
| New.ReferenceOTU96             | k__Bacteria;p__Fusobacteria;c__Fusobacteriia;o__Fusobacteriales;f__Fusobacteriaceae;g__Fusobacterium;s__             | 4.04E-05 | 2.03E+00 | 8.12E+00 |
| 4060501                        | k__Bacteria;p__Firmicutes;c__Clostridia;o__Clostridiales;f__Peptococcaceae;g__s__                                    | 4.04E-05 | 1.04E+00 | 0.00E+00 |
| 221429                         | k__Bacteria;p__Firmicutes;c__Clostridia;o__Clostridiales;f__Ruminococcaceae;g__s__                                   | 4.09E-05 | 6.90E+01 | 2.69E+00 |
| 290240                         | k__Bacteria;p__Firmicutes;c__Clostridia;o__Clostridiales;f__Lachnospiraceae;g__Epulopiscium;s__                      | 4.11E-05 | 1.11E+00 | 3.00E+01 |
| 592616                         | k__Bacteria;p__Firmicutes;c__Erysipelotrichi;o__Erysipelotrichales;f__Erysipelotrichaceae;g__s__                     | 4.11E-05 | 2.59E+00 | 0.00E+00 |
| 4296211                        | k__Bacteria;p__Firmicutes;c__Clostridia;o__Clostridiales;f__Lachnospiraceae;g__Blautia;s__                           | 4.11E-05 | 4.75E+00 | 5.37E+01 |
| 4410401                        | k__Bacteria;p__Firmicutes;c__Clostridia;o__Clostridiales;f__Veillonellaceae;g__Veillonella;s__parvula                | 4.14E-05 | 9.85E+00 | 4.63E+01 |
| New.ReferenceOTU29             | k__Bacteria;p__Firmicutes;c__Clostridia;o__Clostridiales;f__Christensenellaceae;g__s__                               | 4.14E-05 | 6.48E+01 | 2.00E+00 |
| 188610                         | k__Bacteria;p__Firmicutes;c__Clostridia;o__Clostridiales;f__Lachnospiraceae;g__Blautia;s__producta                   | 4.18E-05 | 7.89E+01 | 2.99E+02 |
| 299818                         | k__Bacteria;p__Firmicutes;c__Clostridia;o__Clostridiales;f__Lachnospiraceae;g__s__                                   | 4.20E-05 | 1.80E+00 | 1.04E+01 |
| 293697                         | k__Bacteria;p__Firmicutes;c__Clostridia;o__Clostridiales;f__Clostridiaceae;g__s__                                    | 4.24E-05 | 4.65E+01 | 2.66E+00 |
| New.ReferenceOTU188            | k__Bacteria;p__Firmicutes;c__Clostridia;o__Clostridiales;f__Ruminococcaceae;g__s__                                   | 4.26E-05 | 2.35E+00 | 6.16E+00 |
| New.ReferenceOTU645            | k__Bacteria;p__Bacteroidetes;c__Bacteroidia;o__Bacteroidales;f__g__s__                                               | 4.29E-05 | 3.24E+01 | 2.90E+00 |
| 369705                         | k__Bacteria;p__Firmicutes;c__Bacilli;o__Bacillales;f__Staphylococcaceae;g__Jeo                                       | 4.35E-05 | 1.38E+00 | 1.49E+02 |
| 1108747                        | k__Bacteria;p__Tenericutes;c__Mollicutes;o__RF39;f__g__s__                                                           | 4.36E-05 | 2.11E+00 | 1.19E+01 |
| 159711                         | k__Bacteria;p__Proteobacteria;c__Gammaproteobacteria;o__Pseudomonadales;f__Moraxellaceae;g__Acinetobacter;s__lwoffii | 4.46E-05 | 2.82E+02 | 1.38E+02 |
| 176318                         | k__Bacteria;p__Firmicutes;c__Clostridia;o__Clostridiales;f__Christensenellaceae;g__s__                               | 4.51E-05 | 8.64E+01 | 4.28E+01 |
| 25534                          | k__Bacteria;p__Firmicutes;c__Clostridia;o__Clostridiales;f__Lachnospiraceae;g__s__                                   | 4.53E-05 | 4.52E+00 | 2.45E+00 |
| 297116                         | k__Bacteria;p__Firmicutes;c__Clostridia;o__Clostridiales;f__Ruminococcaceae;g__s__                                   | 4.80E-05 | 1.10E+00 | 3.48E+00 |
| 4238405                        | k__Bacteria;p__Firmicutes;c__Clostridia;o__Clostridiales;f__g__s__                                                   | 4.84E-05 | 3.08E+00 | 5.39E+00 |
| 109733                         | k__Bacteria;p__Firmicutes;c__Clostridia;o__Clostridiales;f__g__s__                                                   | 5.15E-05 | 1.00E+00 | 2.93E+00 |
| 301331                         | k__Bacteria;p__Bacteroidetes;c__Bacteroidia;o__Bacteroidales;f__g__s__                                               | 5.34E-05 | 7.04E+02 | 1.69E+00 |
| New.CleanUp.ReferenceOTU3961   | k__Bacteria;p__Firmicutes;c__Clostridia;o__Clostridiales;f__Christensenellaceae;g__s__                               | 5.42E-05 | 9.86E+02 | 1.01E+00 |
| 277425                         | k__Bacteria;p__Firmicutes;c__Clostridia;o__Clostridiales;f__g__s__                                                   | 5.43E-05 | 1.55E+00 | 5.61E+00 |

|                               |                                                                                                                |          |          |          |
|-------------------------------|----------------------------------------------------------------------------------------------------------------|----------|----------|----------|
| 522353                        | k__Bacteria;p__Firmicutes;c__Erysipelotrichi;o__Erysipelotrichales;f__Erysipelotrichaceae;g__Coprobacillus;s__ | 5.51E-05 | 1.52E+00 | 2.99E-01 |
| 180468                        | k__Bacteria;p__Firmicutes;c__Clostridia;o__Clostridiales;f__Ruminococcaceae;g__Oscillospira;s__                | 5.51E-05 | 1.35E+00 | 2.69E-01 |
| 313967                        | k__Bacteria;p__Verrucomicrobia;c__Verruco-5;o__WCHB1-41;f__RFP12;g__s__                                        | 5.54E-05 | 1.41E-01 | 1.79E+00 |
| 4464173                       | k__Bacteria;p__Firmicutes;c__Clostridia;o__Clostridiales;f__Lachnospiraceae;g__s__                             | 5.62E-05 | 8.63E+00 | 1.67E+00 |
| New.ReferenceOTU946           | k__Bacteria;p__Bacteroidetes;c__Bacteroidia;o__Bacteroidales;f__[Odoribacteraceae];g__Odoribacter;s__          | 5.75E-05 | 3.97E+00 | 8.21E-01 |
| 4310208                       | k__Bacteria;p__Firmicutes;c__Clostridia;o__Clostridiales;f__Veillonellaceae;g__Veillonella;s__parvula          | 5.82E-05 | 4.07E+00 | 4.03E-01 |
| 2177996                       | k__Bacteria;p__Firmicutes;c__Clostridia;o__Clostridiales;f__Lachnospiraceae;g__s__                             | 5.93E-05 | 2.75E+00 | 1.94E-01 |
| 4315790                       | k__Bacteria;p__Firmicutes;c__Clostridia;o__Clostridiales;f__Ruminococcaceae;g__s__                             | 6.12E-05 | 3.66E-01 | 1.75E+00 |
| 812475                        | k__Bacteria;p__Bacteroidetes;c__Bacteroidia;o__Bacteroidales;f__g__s__                                         | 6.12E-05 | 2.68E-01 | 1.43E+00 |
| New.CleanUp.ReferenceOTU33321 | k__Bacteria;p__Firmicutes;c__Clostridia;o__Clostridiales;f__Ruminococcaceae;g__s__                             | 6.24E-05 | 1.13E-01 | 1.24E+00 |
| 197988                        | k__Bacteria;p__Firmicutes;c__Clostridia;o__Clostridiales;f__Ruminococcaceae;g__Oscillospira;s__                | 6.27E-05 | 1.06E+01 | 2.45E+00 |
| 295333                        | k__Bacteria;p__Firmicutes;c__Clostridia;o__Clostridiales;f__Lachnospiraceae;g__s__                             | 6.27E-05 | 2.68E-01 | 8.66E-01 |
| 198930                        | k__Bacteria;p__Firmicutes;c__Clostridia;o__Clostridiales;f__Lachnospiraceae;g__Roseburia;s__                   | 6.36E-05 | 1.87E+00 | 2.54E-01 |
| 293304                        | k__Bacteria;p__Bacteroidetes;c__Bacteroidia;o__Bacteroidales;f__g__s__                                         | 6.45E-05 | 6.48E-01 | 1.84E+00 |
| 4318194                       | k__Bacteria;p__Firmicutes;c__Clostridia;o__Clostridiales;f__g__s__                                             | 6.46E-05 | 4.08E-01 | 1.70E+00 |
| New.ReferenceOTU5             | k__Bacteria;p__Bacteroidetes;c__Bacteroidia;o__Bacteroidales;f__g__s__                                         | 6.53E-05 | 5.63E-02 | 7.16E-01 |
| New.ReferenceOTU970           | k__Bacteria;p__Firmicutes;c__Clostridia;o__Clostridiales;f__Christensenellaceae;g__s__                         | 6.53E-05 | 1.32E+00 | 1.34E-01 |
| 349572                        | k__Bacteria;p__Firmicutes;c__Clostridia;o__Clostridiales;f__Lachnospiraceae;g__s__                             | 6.59E-05 | 2.54E-01 | 1.76E+00 |
| New.CleanUp.ReferenceOTU83830 | k__Bacteria;p__Firmicutes;c__Clostridia;o__Clostridiales;f__Ruminococcaceae;g__s__                             | 6.71E-05 | 8.45E-02 | 6.72E-01 |
| 290322                        | k__Bacteria;p__Firmicutes;c__Clostridia;o__Clostridiales;f__Ruminococcaceae;g__s__                             | 6.71E-05 | 8.59E-01 | 3.36E+00 |
| 574421                        | k__Bacteria;p__Firmicutes;c__Clostridia;o__Clostridiales;f__Ruminococcaceae;g__Ruminococcus;s__                | 6.82E-05 | 3.42E+00 | 1.26E+01 |
| 302909                        | k__Bacteria;p__Firmicutes;c__Clostridia;o__Clostridiales;f__Lachnospiraceae;g__s__                             | 6.82E-05 | 5.25E+00 | 1.12E+01 |
| 110829                        | k__Bacteria;p__Firmicutes;c__Clostridia;o__Clostridiales;f__g__s__                                             | 6.87E-05 | 3.77E+00 | 6.79E+00 |
| 4433947                       | k__Bacteria;p__Bacteroidetes;c__Bacteroidia;o__Bacteroidales;f__Bacteroidaceae;g__Bacteroides;s__              | 6.94E-05 | 7.90E+00 | 1.58E+00 |
| 299858                        | k__Bacteria;p__Firmicutes;c__Clostridia;o__Clostridiales;f__g__s__                                             | 7.08E-05 | 1.37E+00 | 0.00E+00 |
| 289454                        | k__Bacteria;p__Firmicutes;c__Clostridia;o__Clostridiales;f__Christensenellaceae;g__s__                         | 7.10E-05 | 9.86E-02 | 1.36E+00 |
| 320207                        | k__Bacteria;p__Firmicutes;c__Clostridia;o__Clostridiales;f__Ruminococcaceae;g__s__                             | 7.18E-05 | 2.78E+01 | 4.39E+01 |
| 541334                        | k__Bacteria;p__Firmicutes;c__Clostridia;o__Clostridiales;f__Ruminococcaceae;g__Ruminococcus                    | 7.22E-05 | 2.15E+00 | 1.00E+01 |
| 1041094                       | k__Bacteria;p__Firmicutes;c__Clostridia;o__Clostridiales;f__g__s__                                             | 7.23E-05 | 1.13E-01 | 1.63E+00 |
| 319788                        | k__Bacteria;p__Bacteroidetes;c__Bacteroidia;o__Bacteroidales;f__g__s__                                         | 7.29E-05 | 0.00E+00 | 6.27E-01 |
| 306306                        | k__Bacteria;p__Firmicutes;c__Bacilli;o__Lactobacillales;f__Lactobacillaceae;g__Lactobacillus;s__               | 7.33E-05 | 5.80E+00 | 1.43E+00 |
| 4347265                       | k__Bacteria;p__Firmicutes;c__Clostridia;o__Clostridiales;f__Clostridiaceae;g__s__                              | 7.33E-05 | 1.05E+01 | 4.07E+00 |

|                                |                                                                                                                 |          |          |          |
|--------------------------------|-----------------------------------------------------------------------------------------------------------------|----------|----------|----------|
| New.CleanUp.ReferenceOTU174844 | k_Bacteria;p_Bacteroidetes;c_Bacteroidia;o_Bacteroidales                                                        | 7.39E-05 | 2.11E-01 | 2.07E+00 |
| 346974                         | k_Bacteria;p_Firmicutes;c_Clostridia;o_Clostridiales;f_[Mogibacteriaceae];g_;s__                                | 7.64E-05 | 6.47E+01 | 1.35E+02 |
| New.ReferenceOTU584            | k_Bacteria;p_Firmicutes;c_Clostridia;o_Clostridiales;f_;g_;s__                                                  | 7.66E-05 | 1.65E+00 | 2.96E+00 |
| 212686                         | k_Bacteria;p_Firmicutes;c_Clostridia;o_Clostridiales;f_Ruminococcaceae;g_Oscillospira;s__                       | 7.84E-05 | 1.80E+00 | 1.49E+02 |
| 313069                         | k_Bacteria;p_Firmicutes;c_Clostridia;o_Clostridiales;f_Clostridiaceae;g_;s__                                    | 8.22E-05 | 6.76E+01 | 2.99E+02 |
| 271602                         | k_Bacteria;p_Firmicutes;c_Clostridia;o_Clostridiales;f_;g_;s__                                                  | 8.29E-05 | 4.17E+00 | 4.48E+01 |
| 310679                         | k_Bacteria;p_Bacteroidetes;c_Bacteroidia;o_Bacteroidales;f_;g_;s__                                              | 8.31E-05 | 7.45E+00 | 1.29E+01 |
| 321290                         | k_Bacteria;p_Firmicutes;c_Clostridia;o_Clostridiales;f_Lachnospiraceae;g_;s__                                   | 8.36E-05 | 9.15E+01 | 9.88E+00 |
| 186352                         | k_Bacteria;p_Bacteroidetes;c_Bacteroidia;o_Bacteroidales;f_Bacteroidaceae;g_Bacteroides;s__                     | 8.55E-05 | 1.15E+00 | 1.19E+01 |
| 4324985                        | k_Bacteria;p_Firmicutes;c_Clostridia;o_Clostridiales;f_Ruminococcaceae;g_;s__                                   | 8.57E-05 | 2.77E+00 | 6.96E+00 |
| 3256931                        | k_Bacteria;p_Bacteroidetes;c_Bacteroidia;o_Bacteroidales;f_Bacteroidaceae;g_Bacteroides;s__                     | 8.61E-05 | 9.72E+01 | 1.49E+01 |
| New.ReferenceOTU980            | k_Bacteria;p_Firmicutes;c_Clostridia;o_Clostridiales;f_Eubacteriaceae;g_Pseudoramibacter_Eubacterium;s__        | 8.73E-05 | 8.87E+01 | 4.15E+00 |
| 331575                         | k_Bacteria;p_Firmicutes;c_Clostridia;o_Clostridiales;f_Lachnospiraceae;g_Coprococcus;s__                        | 8.90E-05 | 5.21E+01 | 1.69E+00 |
| 296406                         | k_Bacteria;p_Spirochaetes;c_Spirochaetes;o_Spirochaetales;f_Spirochaetaeaceae;g_Treponema;s__                   | 9.02E-05 | 1.13E+01 | 8.21E+01 |
| New.ReferenceOTU954            | k_Bacteria;p_Firmicutes;c_Clostridia;o_Clostridiales;f_Lachnospiraceae;g_;s__                                   | 9.37E-05 | 2.11E+01 | 1.07E+00 |
| 2203165                        | k_Bacteria;p_Firmicutes;c_Clostridia;o_Clostridiales;f_Ruminococcaceae;g_Oscillospira;s__                       | 9.37E-05 | 8.31E+01 | 7.46E+02 |
| New.ReferenceOTU953            | Unassigned                                                                                                      | 9.51E-05 | 2.62E+00 | 1.49E+01 |
| New.CleanUp.ReferenceOTU79061  | k_Bacteria;p_Verrucomicrobia;c_Verruco-5;o_WCHB1-41;f_RFP12;g_;s__                                              | 9.58E-05 | 2.11E+01 | 9.10E+01 |
| New.ReferenceOTU499            | k_Bacteria;p_Firmicutes;c_Clostridia;o_Clostridiales;f_Ruminococcaceae;g_Ruminococcus;s__                       | 9.69E-05 | 3.94E+01 | 3.21E+00 |
| New.ReferenceOTU770            | k_Bacteria;p_Bacteroidetes;c_Bacteroidia;o_Bacteroidales;f_;g_;s__                                              | 9.77E-05 | 2.96E+01 | 2.61E+00 |
| 178304                         | k_Bacteria;p_Firmicutes;c_Clostridia;o_Clostridiales;f_Lachnospiraceae;g_;s__                                   | 9.81E-05 | 2.94E+00 | 7.46E+02 |
| 263546                         | k_Bacteria;p_Firmicutes;c_Clostridia;o_Clostridiales;f_Ruminococcaceae;g_Oscillospira;s__                       | 1.01E-04 | 4.82E+00 | 1.84E+00 |
| New.ReferenceOTU912            | k_Archaea;p_Euryarchaeota;c_Methanobacteria;o_Methanobacteriales;f_Methanobacteriaceae;g_Methanobrevibacter;s__ | 1.04E-04 | 1.86E+00 | 4.16E+00 |
| 175485                         | k_Bacteria;p_Bacteroidetes;c_Bacteroidia;o_Bacteroidales;f_Bacteroidaceae;g_Bacteroides;s_fragilis              | 1.05E-04 | 1.90E+00 | 2.39E+01 |
| 4468466                        | k_Bacteria;p_Firmicutes;c_Clostridia;o_Clostridiales;f_Ruminococcaceae;g_;s__                                   | 1.06E-04 | 1.55E+01 | 4.07E+00 |
| New.ReferenceOTU552            | k_Bacteria;p_Firmicutes;c_Clostridia;o_Clostridiales;f_Ruminococcaceae;g_;s__                                   | 1.11E-04 | 8.87E+01 | 2.21E+00 |
| New.ReferenceOTU795            | k_Bacteria;p_Firmicutes;c_Clostridia;o_Clostridiales;f_[Mogibacteriaceae];g_Anaerovorax;s__                     | 1.11E-04 | 3.38E+00 | 3.58E+01 |
| 4404830                        | k_Bacteria;p_Firmicutes;c_Clostridia;o_Clostridiales;f_Ruminococcaceae;g_;s__                                   | 1.12E-04 | 2.30E+00 | 4.48E+02 |
| 298624                         | k_Bacteria;p_Firmicutes;c_Clostridia;o_Clostridiales;f_Ruminococcaceae;g_;s__                                   | 1.13E-04 | 8.45E+02 | 1.00E+00 |
| New.CleanUp.ReferenceOTU151937 | k_Bacteria;p_Firmicutes;c_Clostridia;o_Clostridiales;f_Ruminococcaceae;g_;s__                                   | 1.13E-04 | 1.58E+00 | 2.84E+01 |
| New.CleanUp.ReferenceOTU130268 | k_Bacteria;p_Firmicutes;c_Clostridia;o_Clostridiales;f_Ruminococcaceae;g_;s__                                   | 1.14E-04 | 1.83E+01 | 1.54E+00 |
| 177740                         | k_Bacteria;p_Firmicutes;c_Clostridia;o_Clostridiales;f_Lachnospiraceae;g_Blautia;s_producta                     | 1.16E-04 | 9.30E+01 | 5.97E+02 |

|                                |                                                                                                               |          |          |          |
|--------------------------------|---------------------------------------------------------------------------------------------------------------|----------|----------|----------|
| 306368                         | k_Bacteria;p_Firmicutes;c_Clostridia;o_Clostridiales;f_g_s                                                    | 1.20E-04 | 1.45E+00 | 4.49E+00 |
| 101908                         | k_Bacteria;p_Spirochaetes;c_Spirochaetes;o_Spirochaetales;f_Spirochaetaceae;g_Treponema;s                     | 1.21E-04 | 1.55E-01 | 1.19E+00 |
| 4481195                        | k_Bacteria;p_Firmicutes;c_Clostridia;o_Clostridiales;f_Lachnospiraceae;g_s                                    | 1.25E-04 | 7.37E+00 | 1.57E+00 |
| New.ReferenceOTU331            | k_Archaea;p_Euryarchaeota;c_Methanobacteria;o_Methanobacteriales;f_Methanobacteriaceae;g_Methanobrevibacter;s | 1.25E-04 | 8.59E-01 | 1.90E+00 |
| 290275                         | k_Bacteria;p_Bacteroidetes;c_Bacteroidia;o_Bacteroidales;f_g_s                                                | 1.27E-04 | 1.70E+00 | 5.66E+00 |
| 185299                         | k_Bacteria;p_Firmicutes;c_Clostridia;o_Clostridiales;f_Lachnospiraceae                                        | 1.28E-04 | 7.41E+00 | 2.07E+01 |
| 311952                         | k_Bacteria;p_Firmicutes;c_Clostridia;o_Clostridiales;f_Lachnospiraceae;g_s                                    | 1.30E-04 | 7.04E-02 | 1.99E+00 |
| 1110312                        | k_Bacteria;p_Firmicutes;c_Clostridia;o_Clostridiales;f_g_s                                                    | 1.30E-04 | 1.31E+00 | 1.49E-01 |
| 571642                         | k_Bacteria;p_Firmicutes;c_Clostridia;o_Clostridiales;f_Ruminococcaceae;g_s                                    | 1.31E-04 | 5.35E-01 | 0.00E+00 |
| 295055                         | k_Bacteria;p_Firmicutes;c_Clostridia;o_Clostridiales;f_Ruminococcaceae;g_s                                    | 1.33E-04 | 3.07E+00 | 4.39E+00 |
| 332126                         | k_Bacteria;p_Firmicutes;c_Clostridia;o_Clostridiales;f_Lachnospiraceae;g_s                                    | 1.34E-04 | 9.15E-01 | 4.00E+00 |
| 739826                         | k_Bacteria;p_Firmicutes;c_Clostridia;o_Clostridiales;f_Lachnospiraceae;g_s                                    | 1.34E-04 | 9.15E-01 | 2.99E-02 |
| 4469576                        | k_Bacteria;p_Firmicutes;c_Clostridia;o_Clostridiales;f_Lachnospiraceae;g_s                                    | 1.35E-04 | 3.11E+00 | 1.44E+01 |
| New.ReferenceOTU66             | k_Bacteria;p_Firmicutes;c_Clostridia;o_Clostridiales;f_Clostridiaceae;g_Sarcina;s                             | 1.36E-04 | 1.69E-01 | 7.16E-01 |
| 104144                         | k_Bacteria;p_Firmicutes;c_Clostridia;o_Clostridiales;f_Ruminococcaceae;g_s                                    | 1.37E-04 | 0.00E+00 | 3.73E-01 |
| 295871                         | k_Bacteria;p_Firmicutes;c_Clostridia;o_Clostridiales;f_Ruminococcaceae;g_s                                    | 1.37E-04 | 1.30E+00 | 3.22E+00 |
| New.ReferenceOTU847            | k_Bacteria;p_Firmicutes;c_Clostridia;o_Clostridiales;f_Peptococcaceae;g_Desulfurispora;s                      | 1.38E-04 | 0.00E+00 | 4.93E-01 |
| New.CleanUp.ReferenceOTU47030  | k_Bacteria;p_Firmicutes;c_Clostridia;o_Clostridiales;f_g_s                                                    | 1.38E-04 | 5.63E-02 | 5.52E-01 |
| 317814                         | k_Bacteria;p_Firmicutes;c_Clostridia;o_Clostridiales;f_Ruminococcaceae;g_s                                    | 1.38E-04 | 1.69E-01 | 1.82E+00 |
| 4440670                        | k_Bacteria;p_Firmicutes;c_Clostridia;o_Clostridiales;f_Veillonellaceae;g_Veillonella;s                        | 1.40E-04 | 3.39E+00 | 2.39E-01 |
| New.CleanUp.ReferenceOTU131784 | k_Bacteria;p_Firmicutes;c_Clostridia;o_Clostridiales;f_g_s                                                    | 1.42E-04 | 1.41E-02 | 1.27E+00 |
| 3422630                        | k_Bacteria;p_Firmicutes;c_Clostridia;o_Clostridiales;f_Ruminococcaceae;g_s                                    | 1.43E-04 | 2.14E+00 | 3.13E-01 |
| 344636                         | k_Bacteria;p_Firmicutes;c_Clostridia;o_Clostridiales;f_g_s                                                    | 1.43E-04 | 2.25E-01 | 1.13E+00 |
| 583656                         | k_Bacteria;p_Bacteroidetes;c_Bacteroidia;o_Bacteroidales;f_Bacteroidaceae;g_Bacteroides;s                     | 1.44E-04 | 9.01E-01 | 1.49E-02 |
| New.CleanUp.ReferenceOTU157283 | k_Bacteria;p_Firmicutes;c_Clostridia;o_Clostridiales;f_Lachnospiraceae;g_s                                    | 1.45E-04 | 6.76E-01 | 1.49E-02 |
| 1504042                        | k_Bacteria;p_Firmicutes;c_Clostridia;o_Clostridiales;f_Ruminococcaceae;g_Oscillospira;s                       | 1.45E-04 | 1.11E+00 | 1.49E-02 |
| New.ReferenceOTU687            | k_Archaea;p_Euryarchaeota;c_Methanobacteria;o_Methanobacteriales;f_Methanobacteriaceae;g_Methanobrevibacter;s | 1.47E-04 | 2.00E+00 | 7.33E+00 |
| 349656                         | k_Bacteria;p_Firmicutes;c_Clostridia;o_Clostridiales;f_g_s                                                    | 1.48E-04 | 1.17E+00 | 1.91E+00 |
| New.CleanUp.ReferenceOTU24282  | k_Bacteria;p_Firmicutes;c_Clostridia;o_Clostridiales;f_Lachnospiraceae;g_Dorea;s                              | 1.48E-04 | 5.63E-01 | 1.49E-02 |
| 4315783                        | k_Bacteria;p_Firmicutes;c_Clostridia;o_Clostridiales;f_Ruminococcaceae;g_s                                    | 1.49E-04 | 1.97E-01 | 8.51E-01 |
| 3244896                        | k_Bacteria;p_Firmicutes;c_Bacilli;o_Lactobacillales;f_Streptococcaceae;g_Streptococcus;s_luteciae             | 1.50E-04 | 2.95E+01 | 1.45E+01 |
| New.ReferenceOTU506            | k_Bacteria;p_Bacteroidetes;c_Bacteroidia;o_Bacteroidales;f_g_s                                                | 1.54E-04 | 1.41E-01 | 1.37E+00 |

|                                |                                                                                                                |          |          |          |
|--------------------------------|----------------------------------------------------------------------------------------------------------------|----------|----------|----------|
| 342287                         | k_Bacteria;p_Bacteroidetes;c_Bacteroidia;o_Bacteroidales;f_RF16;g_;s_                                          | 1.57E-04 | 2.11E-01 | 2.25E+00 |
| 335268                         | k_Bacteria;p_Firmicutes;c_Clostridia;o_Clostridiales;f_Ruminococcaceae;g_;s_                                   | 1.58E-04 | 2.54E-01 | 3.91E+00 |
| 1103978                        | k_Bacteria;p_Firmicutes;c_Clostridia;o_Clostridiales;f_Lachnospiraceae;g_;s_                                   | 1.60E-04 | 1.32E+00 | 3.22E+00 |
| 191389                         | k_Bacteria;p_Firmicutes;c_Clostridia;o_Clostridiales;f_[Mogibacteriaceae];g_;s_                                | 1.62E-04 | 1.20E+00 | 8.96E-02 |
| 1517774                        | k_Bacteria;p_Firmicutes;c_Clostridia;o_Clostridiales;f_;g_;s_                                                  | 1.62E-04 | 5.06E+00 | 4.93E-01 |
| 341899                         | k_Bacteria;p_Firmicutes;c_Clostridia;o_Clostridiales;f_Lachnospiraceae;g_Coprococcus;s_                        | 1.64E-04 | 2.77E+00 | 3.73E-01 |
| 4438983                        | k_Archaea;p_Euryarchaeota;c_Methanobacteria;o_Methanobacteriales;f_Methanobacteriaceae;g_Methanobrevibacter;s_ | 1.64E-04 | 2.57E+01 | 2.54E+01 |
| 15728                          | k_Bacteria;p_Firmicutes;c_Erysipelotrichi;o_Erysipelotrichales;f_Erysipelotrichaceae;g_Holdemania;s_           | 1.67E-04 | 8.17E-01 | 4.48E-02 |
| 238944                         | k_Bacteria;p_Firmicutes;c_Bacilli;o_Bacillales;f_Bacillaceae;g_Bacillus;s_                                     | 1.69E-04 | 1.77E+01 | 8.57E+00 |
| 287493                         | k_Bacteria;p_Bacteroidetes;c_Bacteroidia;o_Bacteroidales;f_;g_;s_                                              | 1.70E-04 | 2.25E-01 | 3.61E+00 |
| 299081                         | k_Bacteria;p_Firmicutes;c_Clostridia;o_Clostridiales;f_Ruminococcaceae;g_;s_                                   | 1.71E-04 | 2.62E+00 | 2.54E-01 |
| 298910                         | k_Bacteria;p_Verrucomicrobia;c_Verruco-5;o_WCHB1-41;f_RFP12;g_;s_                                              | 1.78E-04 | 1.27E-01 | 8.06E-01 |
| 2730944                        | k_Bacteria;p_Bacteroidetes;c_Bacteroidia;o_Bacteroidales;f_Bacteroidaceae;g_Bacteroides;s_coprophilus          | 1.78E-04 | 2.82E-02 | 3.37E+00 |
| 3039313                        | k_Bacteria;p_Firmicutes;c_Clostridia;o_Clostridiales;f_Veillonellaceae;g_Megasphaera;s_                        | 1.79E-04 | 1.14E+00 | 4.48E-02 |
| 4414725                        | k_Bacteria;p_Firmicutes;c_Clostridia;o_Clostridiales;f_Lachnospiraceae;g_Blautia;s_                            | 1.81E-04 | 3.21E+00 | 2.24E-01 |
| 288899                         | k_Bacteria;p_Verrucomicrobia;c_Verruco-5;o_WCHB1-41;f_RFP12;g_;s_                                              | 1.81E-04 | 3.10E-01 | 2.63E+00 |
| New.CleanUp.ReferenceOTU129428 | k_Bacteria;p_Firmicutes;c_Clostridia;o_Clostridiales;f_Ruminococcaceae;g_;s_                                   | 1.83E-04 | 1.41E-01 | 8.51E-01 |
| New.ReferenceOTU73             | k_Bacteria;p_Firmicutes;c_Clostridia;o_Clostridiales;f_Lachnospiraceae;g_;s_                                   | 1.85E-04 | 2.96E-01 | 1.43E+00 |
| 296124                         | k_Bacteria;p_Bacteroidetes;c_Bacteroidia;o_Bacteroidales;f_;g_;s_                                              | 1.88E-04 | 1.23E+01 | 1.66E+01 |
| New.ReferenceOTU308            | k_Bacteria;p_Firmicutes;c_Clostridia;o_Clostridiales;f_Ruminococcaceae;g_Ruminococcus;s_                       | 1.90E-04 | 7.18E-01 | 3.82E+00 |
| 319818                         | k_Bacteria;p_Firmicutes;c_Clostridia;o_Clostridiales;f_Ruminococcaceae;g_;s_                                   | 1.93E-04 | 8.69E+00 | 1.31E+00 |
| 343667                         | k_Bacteria;p_Firmicutes;c_Clostridia;o_Clostridiales;f_;g_;s_                                                  | 1.95E-04 | 5.07E-01 | 2.04E+00 |
| 183620                         | k_Bacteria;p_Firmicutes;c_Clostridia;o_Clostridiales;f_Ruminococcaceae;g_;s_                                   | 1.95E-04 | 3.28E+00 | 6.52E+00 |
| 4449054                        | k_Bacteria;p_Bacteroidetes;c_Bacteroidia;o_Bacteroidales;f_Bacteroidaceae;g_Bacteroides;s_caccae               | 1.98E-04 | 4.82E+00 | 9.40E-01 |
| 684238                         | k_Bacteria;p_Firmicutes;c_Clostridia;o_Clostridiales;f_Ruminococcaceae;g_;s_                                   | 2.02E-04 | 2.68E-01 | 1.07E+00 |
| 1148019                        | k_Bacteria;p_Firmicutes;c_Bacilli;o_Bacillales;f_Planococcaceae                                                | 2.04E-04 | 4.21E+01 | 1.64E+01 |
| 314552                         | k_Bacteria;p_Bacteroidetes;c_Bacteroidia;o_Bacteroidales;f_;g_;s_                                              | 2.09E-04 | 2.42E+00 | 4.58E+00 |
| 177037                         | k_Bacteria;p_Firmicutes;c_Clostridia;o_Clostridiales;f_Lachnospiraceae;g_;s_                                   | 2.10E-04 | 3.25E+00 | 3.28E-01 |
| 348377                         | k_Bacteria;p_Firmicutes;c_Clostridia;o_Clostridiales;f_;g_;s_                                                  | 2.11E-04 | 3.04E+00 | 1.58E+00 |
| 187233                         | k_Bacteria;p_Firmicutes;c_Bacilli;o_Lactobacillales;f_Lactobacillaceae;g_Lactobacillus;s_                      | 2.14E-04 | 7.21E+00 | 3.22E+00 |
| 3550973                        | k_Bacteria;p_Firmicutes;c_Clostridia;o_Clostridiales;f_Ruminococcaceae;g_;s_                                   | 2.15E-04 | 3.07E+00 | 4.48E-02 |
| 309179                         | k_Bacteria;p_Firmicutes;c_Clostridia;o_Clostridiales;f_Clostridiaceae;g_;s_                                    | 2.15E-04 | 5.69E+00 | 9.13E+00 |



|                                |                                                                                                                         |          |          |          |
|--------------------------------|-------------------------------------------------------------------------------------------------------------------------|----------|----------|----------|
| 195252                         | k__Bacteria;p__Firmicutes;c__Clostridia;o__Clostridiales;f__Ruminococcaceae;g__s__                                      | 2.19E-04 | 1.87E+01 | 4.30E+00 |
| 2298935                        | k__Bacteria;p__Firmicutes;c__Clostridia;o__Clostridiales;f__Lachnospiraceae;g__Roseburia;s__                            | 2.20E-04 | 9.44E-01 | 3.58E-01 |
| 359872                         | k__Bacteria;p__Proteobacteria;c__Deltaproteobacteria;o__Desulfovibrionales;f__Desulfovibrionaceae;g__Bilophila;s__      | 2.25E-04 | 4.94E+00 | 7.01E-01 |
| 288224                         | k__Bacteria;p__Firmicutes;c__Clostridia;o__Clostridiales;f__Lachnospiraceae;g__s__                                      | 2.28E-04 | 7.92E+00 | 1.70E+00 |
| 302321                         | k__Bacteria;p__Firmicutes;c__Clostridia;o__Clostridiales;f__Lachnospiraceae;g__s__                                      | 2.29E-04 | 1.89E+00 | 0.00E+00 |
| New.ReferenceOTU437            | k__Bacteria;p__Firmicutes;c__Clostridia;o__Clostridiales;f__[Mogibacteriaceae];g__s__                                   | 2.32E-04 | 4.37E-01 | 0.00E+00 |
| 759751                         | k__Bacteria;p__Firmicutes;c__Clostridia;o__Clostridiales;f__Lachnospiraceae;g__s__                                      | 2.34E-04 | 9.58E-01 | 0.00E+00 |
| New.CleanUp.ReferenceOTU114509 | k__Bacteria;p__Firmicutes;c__Clostridia;o__Clostridiales;f__Ruminococcaceae;g__s__                                      | 2.35E-04 | 5.49E-01 | 0.00E+00 |
| New.CleanUp.ReferenceOTU9068   | k__Bacteria;p__Firmicutes;c__Clostridia;o__Clostridiales;f__[Mogibacteriaceae];g__s__                                   | 2.35E-04 | 7.32E-01 | 0.00E+00 |
| 4298529                        | k__Bacteria;p__Actinobacteria;c__Coriobacteriia;o__Coriobacteriales;f__Coriobacteriaceae;g__s__                         | 2.35E-04 | 1.27E-01 | 7.16E-01 |
| 4473788                        | k__Bacteria;p__Firmicutes;c__Clostridia;o__Clostridiales;f__Lachnospiraceae;g__s__                                      | 2.35E-04 | 4.08E-01 | 2.09E+00 |
| 30872                          | k__Bacteria;p__Firmicutes;c__Clostridia;o__Clostridiales;f__Ruminococcaceae;g__s__                                      | 2.35E-04 | 1.13E+00 | 0.00E+00 |
| 189820                         | k__Bacteria;p__Firmicutes;c__Clostridia;o__Clostridiales;f__Ruminococcaceae;g__Ruminococcus;s__                         | 2.39E-04 | 1.51E+00 | 8.96E-02 |
| 580121                         | k__Bacteria;p__Firmicutes;c__Clostridia;o__Clostridiales;f__Ruminococcaceae;g__s__                                      | 2.39E-04 | 5.49E-01 | 2.25E+00 |
| 771181                         | k__Bacteria;p__Firmicutes;c__Clostridia;o__Clostridiales;f__Ruminococcaceae;g__s__                                      | 2.47E-04 | 9.86E-02 | 1.99E+00 |
| New.CleanUp.ReferenceOTU110614 | k__Bacteria;p__Firmicutes;c__Clostridia;o__Clostridiales;f__Christensenellaceae;g__s__                                  | 2.50E-04 | 2.82E-02 | 4.63E-01 |
| 288839                         | k__Bacteria;p__Firmicutes;c__Clostridia;o__Clostridiales;f__Ruminococcaceae;g__s__                                      | 2.52E-04 | 4.06E+00 | 8.61E+00 |
| 205613                         | k__Bacteria;p__Firmicutes;c__Clostridia;o__Clostridiales;f__Lachnospiraceae;g__Coprococcus;s__                          | 2.54E-04 | 7.86E+00 | 3.27E+00 |
| 4362337                        | k__Bacteria;p__Firmicutes;c__Clostridia;o__Clostridiales;f__Lachnospiraceae;g__s__                                      | 2.54E-04 | 1.51E+00 | 5.97E-02 |
| 300853                         | k__Bacteria;p__Bacteroidetes;c__Bacteroidia;o__Bacteroidales;f__[Paraprevotellaceae];g__CF231;s__                       | 2.54E-04 | 0.00E+00 | 6.57E-01 |
| New.ReferenceOTU617            | k__Bacteria;p__Firmicutes;c__Clostridia;o__Clostridiales;f__Lachnospiraceae;g__s__                                      | 2.54E-04 | 1.03E+00 | 3.28E-01 |
| New.ReferenceOTU715            | k__Bacteria;p__Bacteroidetes;c__Bacteroidia;o__Bacteroidales;f__[Paraprevotellaceae];g__YRC22;s__                       | 2.54E-04 | 1.55E-01 | 2.34E+00 |
| 184249                         | k__Bacteria;p__Firmicutes;c__Clostridia;o__Clostridiales;f__g__s__                                                      | 2.55E-04 | 9.15E-01 | 2.99E-02 |
| 301733                         | k__Bacteria;p__Firmicutes;c__Clostridia;o__Clostridiales;f__Ruminococcaceae;g__s__                                      | 2.59E-04 | 7.04E-01 | 2.60E+00 |
| New.CleanUp.ReferenceOTU18863  | k__Bacteria;p__Firmicutes;c__Clostridia;o__Clostridiales;f__[Mogibacteriaceae];g__s__                                   | 2.59E-04 | 4.23E-01 | 2.60E+00 |
| 235994                         | k__Bacteria;p__Bacteroidetes;c__Bacteroidia;o__Bacteroidales;f__g__s__                                                  | 2.60E-04 | 1.55E-01 | 6.72E-01 |
| 584107                         | k__Bacteria;p__Firmicutes;c__Clostridia;o__Clostridiales;f__g__s__                                                      | 2.62E-04 | 4.23E+00 | 1.07E+00 |
| 2943548                        | k__Bacteria;p__Firmicutes;c__Clostridia;o__Clostridiales;f__Ruminococcaceae;g__Ruminococcus;s__                         | 2.63E-04 | 6.45E+00 | 1.54E+00 |
| New.CleanUp.ReferenceOTU84961  | k__Bacteria;p__Firmicutes;c__Clostridia;o__Clostridiales;f__Lachnospiraceae;g__s__                                      | 2.64E-04 | 1.83E-01 | 1.19E+00 |
| New.ReferenceOTU296            | k__Archaea;p__Euryarchaeota;c__Methanomicrobia;o__Methanomicrobiales;f__Methanocorpusculaceae;g__Methanocorpusculum;s__ | 2.65E-04 | 5.85E+00 | 1.30E+01 |
| 299639                         | k__Bacteria;p__Firmicutes;c__Clostridia;o__Clostridiales;f__Lachnospiraceae;g__s__                                      | 2.67E-04 | 1.10E+00 | 3.19E+00 |
| New.CleanUp.ReferenceOTU84411  | k__Bacteria;p__Firmicutes;c__Clostridia;o__Clostridiales;f__Lachnospiraceae;g__s__                                      | 2.69E-04 | 2.82E-02 | 4.48E-01 |

|                         |                                                                                                                  |          |          |          |
|-------------------------|------------------------------------------------------------------------------------------------------------------|----------|----------|----------|
| New.ReferenceOTU4<br>43 | k_Bacteria;p_Bacteroidetes;c_Bacteroidia;o_Bacteroidales;f_Bacteroidaceae;g_Bacteroides;s__                      | 2.74E-04 | 8.87E-01 | 7.46E-02 |
| 51306                   | k_Bacteria;p_Firmicutes;c_Clostridia;o_Clostridiales;f_Ruminococcaceae;g_Faecalibacterium;s_prausnitzii          | 2.83E-04 | 1.37E+00 | 2.54E-01 |
| 288079                  | k_Bacteria;p_Firmicutes;c_Clostridia;o_Clostridiales;f_Ruminococcaceae;g__s__                                    | 2.84E-04 | 2.93E+00 | 3.06E+00 |
| 4422039                 | k_Bacteria;p_Firmicutes;c_Clostridia;o_Clostridiales;f_Lachnospiraceae                                           | 3.08E-04 | 6.34E-01 | 4.48E-02 |
| New.ReferenceOTU3<br>25 | k_Bacteria;p_Actinobacteria;c_Coriobacteriia;o_Coriobacteriales;f_Coriobacteriaceae;g__s__                       | 3.19E-04 | 1.17E+00 | 3.40E+00 |
| New.ReferenceOTU1<br>86 | k_Bacteria;p_Firmicutes;c_Clostridia;o_Clostridiales;f__g__s__                                                   | 3.20E-04 | 5.63E-01 | 3.07E+00 |
| 187050                  | k_Bacteria;p_Firmicutes;c_Clostridia;o_Clostridiales;f_Lachnospiraceae;g__s__                                    | 3.22E-04 | 9.86E-01 | 1.19E-01 |
| 730939                  | k_Bacteria;p_Firmicutes;c_Clostridia;o_Clostridiales;f__g__s__                                                   | 3.24E-04 | 4.73E+00 | 9.25E-01 |
| 4342104                 | k_Bacteria;p_Firmicutes;c_Clostridia;o_Clostridiales;f_Ruminococcaceae;g__Anaerotruncus;s__                      | 3.25E-04 | 1.28E+00 | 2.69E-01 |
| New.ReferenceOTU5<br>38 | k_Bacteria;p_Bacteroidetes;c_Bacteroidia;o_Bacteroidales;f__g__s__                                               | 3.26E-04 | 1.11E+00 | 6.28E+00 |
| 3232988                 | k_Bacteria;p_Tenericutes;c_RF3;o_ML615J-28;f__g__s__                                                             | 3.26E-04 | 7.89E-01 | 2.99E-02 |
| New.ReferenceOTU6<br>69 | k_Bacteria;p_Firmicutes;c_Clostridia;o_Clostridiales;f_Ruminococcaceae;g__s__                                    | 3.34E-04 | 1.24E+00 | 2.84E-01 |
| 303313                  | k_Bacteria;p_Firmicutes;c_Clostridia;o_Clostridiales;f_Lachnospiraceae;g__s__                                    | 3.36E-04 | 7.75E-01 | 8.96E-02 |
| 331489                  | k_Bacteria;p_Actinobacteria;c_Actinobacteria;o_Actinomycetales;f_Nocardiaceae;g__s__                             | 3.43E-04 | 2.82E-02 | 2.96E+00 |
| New.ReferenceOTU1<br>28 | k_Bacteria;p_Verrucomicrobia;c_Verruco-5;o_WCHB1-41;f_RFP12;g__s__                                               | 3.44E-04 | 4.23E-02 | 2.57E+00 |
| New.ReferenceOTU2<br>70 | k_Bacteria;p_Firmicutes;c_Clostridia;o_Clostridiales;f_Ruminococcaceae;g__Ruminococcus;s__                       | 3.44E-04 | 1.25E+00 | 4.37E+00 |
| 311692                  | k_Bacteria;p_Firmicutes;c_Clostridia;o_Clostridiales;f_Lachnospiraceae;g__s__                                    | 3.44E-04 | 1.00E+00 | 1.19E-01 |
| 316781                  | k_Bacteria;p_Firmicutes;c_Clostridia;o_Clostridiales;f_Lachnospiraceae;g__s__                                    | 3.44E-04 | 1.51E+00 | 1.67E+00 |
| 176617                  | k_Bacteria;p_Firmicutes;c_Clostridia;o_Clostridiales;f_Ruminococcaceae;g__s__                                    | 3.44E-04 | 6.72E+00 | 5.67E-01 |
| New.ReferenceOTU6<br>50 | k_Archaea;p_Euryarchaeota;c_Methanobacteria;o_Methanobacteriales;f_Methanobacteriaceae;g__Methanobrevibacter;s__ | 3.45E-04 | 5.45E+00 | 1.23E+01 |
| 299607                  | k_Bacteria;p_Bacteroidetes;c_Bacteroidia;o_Bacteroidales;f__g__s__                                               | 3.45E-04 | 1.41E-01 | 1.19E+00 |
| 331449                  | k_Bacteria;p_Firmicutes;c_Clostridia;o_Clostridiales;f__g__s__                                                   | 3.45E-04 | 1.69E-01 | 7.46E-01 |
| 301375                  | k_Bacteria;p_Firmicutes;c_Clostridia;o_Clostridiales;f_Ruminococcaceae;g__s__                                    | 3.45E-04 | 2.23E+00 | 4.55E+00 |
| New.ReferenceOTU3<br>00 | k_Bacteria;p_Verrucomicrobia;c_Verruco-5;o_WCHB1-41;f_RFP12;g__s__                                               | 3.45E-04 | 5.92E-01 | 3.19E+00 |
| 322281                  | k_Bacteria;p_Firmicutes;c_Clostridia;o_Clostridiales;f_Lachnospiraceae;g__s__                                    | 3.46E-04 | 5.21E-01 | 2.51E+00 |
| 4378683                 | k_Bacteria;p_Firmicutes;c_Clostridia;o_Clostridiales;f_Lachnospiraceae;g__s__                                    | 3.48E-04 | 1.72E+00 | 3.82E+00 |
| 4316060                 | k_Bacteria;p_Firmicutes;c_Clostridia;o_Clostridiales;f_Lachnospiraceae;g__Pseudobutyrvibrio;s__                  | 3.57E-04 | 1.10E+00 | 2.04E+00 |
| New.ReferenceOTU2<br>00 | k_Bacteria;p_Firmicutes;c_Clostridia;o_Clostridiales;f__g__s__                                                   | 3.64E-04 | 1.27E-01 | 1.04E+00 |
| 295350                  | k_Bacteria;p_Firmicutes;c_Clostridia;o_Clostridiales;f__g__s__                                                   | 3.64E-04 | 7.04E-02 | 1.43E+00 |
| 320853                  | k_Bacteria;p_Firmicutes;c_Clostridia;o_Clostridiales;f_Clostridiaceae;g__s__                                     | 3.65E-04 | 1.55E-01 | 8.36E-01 |
| 4323524                 | k_Bacteria;p_Firmicutes;c_Clostridia;o_Clostridiales;f__g__s__                                                   | 3.66E-04 | 1.85E+00 | 2.54E-01 |
| 114821                  | k_Bacteria;p_Firmicutes;c_Clostridia;o_Clostridiales;f_Veillonellaceae;g__Veillonella;s__parvula                 | 3.67E-04 | 2.11E+00 | 2.99E-01 |

|                                |                                                                                                            |          |          |          |
|--------------------------------|------------------------------------------------------------------------------------------------------------|----------|----------|----------|
| New.ReferenceOTU882            | k__Bacteria;p__Firmicutes;c__Clostridia;o__Clostridiales;f__Lachnospiraceae;g__s__                         | 3.92E-04 | 2.54E-01 | 1.19E+00 |
| 334682                         | k__Bacteria;p__Bacteroidetes;c__Bacteroidia;o__Bacteroidales;f__RF16;g__s__                                | 3.94E-04 | 1.13E-01 | 9.40E-01 |
| 191551                         | k__Bacteria;p__Firmicutes;c__Clostridia;o__Clostridiales;f__Lachnospiraceae;g__[Ruminococcus];s__          | 4.09E-04 | 1.03E+00 | 2.99E-02 |
| 180813                         | k__Bacteria;p__Firmicutes;c__Clostridia;o__Clostridiales;f__g__s__                                         | 4.09E-04 | 3.66E-01 | 0.00E+00 |
| New.CleanUp.ReferenceOTU91080  | k__Bacteria;p__Firmicutes;c__Clostridia;o__Clostridiales;f__g__s__                                         | 4.11E-04 | 4.23E-01 | 0.00E+00 |
| New.CleanUp.ReferenceOTU155828 | k__Bacteria;p__Firmicutes;c__Clostridia;o__Clostridiales;f__Ruminococcaceae;g__s__                         | 4.13E-04 | 2.48E+00 | 0.00E+00 |
| 4419621                        | k__Bacteria;p__Proteobacteria;c__Betaproteobacteria;o__Burkholderiales;f__Alcaligenaceae;g__Sutterella;s__ | 4.23E-04 | 1.85E+00 | 7.46E-02 |
| New.CleanUp.ReferenceOTU95826  | k__Bacteria;p__Firmicutes;c__Clostridia;o__Clostridiales;f__Ruminococcaceae;g__s__                         | 4.43E-04 | 5.63E-02 | 6.87E-01 |
| 3195723                        | k__Bacteria;p__Firmicutes;c__Clostridia;o__Clostridiales;f__Ruminococcaceae;g__Oscillospira;s__            | 4.48E-04 | 4.85E+00 | 1.93E+00 |
| 329798                         | k__Bacteria;p__Firmicutes;c__Clostridia;o__Clostridiales;f__Veillonellaceae;g__Phascolarctobacterium;s__   | 4.63E-04 | 8.31E-01 | 1.49E-02 |
| 296278                         | k__Bacteria;p__Firmicutes;c__Clostridia;o__Clostridiales;f__Lachnospiraceae;g__s__                         | 4.63E-04 | 9.86E-01 | 3.01E+00 |
| New.CleanUp.ReferenceOTU75562  | k__Bacteria;p__Spirochaetes;c__Spirochaetes;o__Spirochaetales;f__Spirochaetaceae;g__Treponema;s__          | 4.66E-04 | 5.63E-02 | 9.55E-01 |
| 2506486                        | k__Bacteria;p__Firmicutes;c__Clostridia;o__Clostridiales;f__Ruminococcaceae;g__s__                         | 4.72E-04 | 4.65E-01 | 1.49E-02 |
| New.ReferenceOTU201            | k__Bacteria;p__Firmicutes;c__Clostridia;o__Clostridiales;f__g__s__                                         | 4.72E-04 | 1.97E-01 | 6.27E-01 |
| New.CleanUp.ReferenceOTU48136  | k__Bacteria;p__Firmicutes;c__Clostridia;o__Clostridiales;f__Christensenellaceae;g__s__                     | 4.75E-04 | 0.00E+00 | 2.99E-01 |
| New.CleanUp.ReferenceOTU124987 | k__Bacteria;p__Firmicutes;c__Clostridia;o__Clostridiales;f__Lachnospiraceae                                | 4.77E-04 | 0.00E+00 | 3.28E-01 |
| New.CleanUp.ReferenceOTU85297  | k__Bacteria;p__Spirochaetes;c__Spirochaetes;o__Spirochaetales;f__Spirochaetaceae;g__Treponema;s__          | 4.79E-04 | 0.00E+00 | 5.22E-01 |
| 297150                         | k__Bacteria;p__Firmicutes;c__Clostridia;o__Clostridiales;f__Lachnospiraceae;g__Dorea;s__                   | 4.80E-04 | 3.27E+00 | 1.00E+00 |
| New.ReferenceOTU647            | k__Bacteria;p__Firmicutes;c__Clostridia;o__Clostridiales;f__g__s__                                         | 4.80E-04 | 0.00E+00 | 3.88E-01 |
| New.CleanUp.ReferenceOTU163990 | k__Bacteria;p__Bacteroidetes;c__Bacteroidia;o__Bacteroidales;f__g__s__                                     | 4.80E-04 | 0.00E+00 | 6.72E-01 |
| 297133                         | k__Bacteria;p__Firmicutes;c__Clostridia;o__Clostridiales;f__Ruminococcaceae;g__s__                         | 4.83E-04 | 2.54E-01 | 1.43E+00 |
| New.CleanUp.ReferenceOTU7725   | k__Bacteria;p__Spirochaetes;c__Spirochaetes;o__Spirochaetales;f__Spirochaetaceae;g__Treponema;s__          | 4.83E-04 | 2.82E-02 | 4.18E-01 |
| 4396298                        | k__Bacteria;p__Firmicutes;c__Clostridia;o__Clostridiales;f__Ruminococcaceae;g__s__                         | 4.84E-04 | 1.83E-01 | 1.37E+00 |
| 301410                         | k__Bacteria;p__Firmicutes;c__Clostridia;o__Clostridiales;f__Ruminococcaceae;g__s__                         | 4.94E-04 | 1.27E-01 | 1.09E+00 |
| 330831                         | k__Bacteria;p__Bacteroidetes;c__Bacteroidia;o__Bacteroidales;f__BS11;g__s__                                | 4.94E-04 | 2.82E-02 | 1.75E+00 |
| 312217                         | k__Bacteria;p__Firmicutes;c__Clostridia;o__Clostridiales;f__Lachnospiraceae;g__s__                         | 4.94E-04 | 1.13E-01 | 6.87E-01 |
| 292488                         | k__Bacteria;p__Bacteroidetes;c__Bacteroidia;o__Bacteroidales;f__g__s__                                     | 4.98E-04 | 3.00E+00 | 3.45E+00 |
| New.CleanUp.ReferenceOTU31519  | k__Bacteria;p__Firmicutes;c__Clostridia;o__Clostridiales;f__Ruminococcaceae;g__s__                         | 4.99E-04 | 1.83E-01 | 1.39E+00 |
| 342213                         | k__Bacteria;p__Firmicutes;c__Clostridia;o__Clostridiales;f__Ruminococcaceae;g__s__                         | 4.99E-04 | 6.48E-01 | 1.54E+00 |
| New.ReferenceOTU476            | k__Bacteria;p__Firmicutes;c__Clostridia;o__Clostridiales;f__Ruminococcaceae;g__Ruminococcus;s__            | 5.15E-04 | 8.03E-01 | 2.64E+00 |
| New.ReferenceOTU380            | k__Bacteria;p__Bacteroidetes;c__Bacteroidia;o__Bacteroidales;f__g__s__                                     | 5.16E-04 | 1.55E-01 | 1.10E+00 |
| 293637                         | k__Bacteria;p__Firmicutes;c__Clostridia;o__Clostridiales;f__Lachnospiraceae;g__s__                         | 5.26E-04 | 2.11E-01 | 1.21E+00 |

|                                |                                                                                                                      |          |          |          |
|--------------------------------|----------------------------------------------------------------------------------------------------------------------|----------|----------|----------|
| 4405146                        | k__Bacteria;p__Firmicutes;c__Clostridia;o__Clostridiales;f__g__s__                                                   | 5.26E-04 | 6.51E+01 | 1.16E+01 |
| 297178                         | k__Bacteria;p__Firmicutes;c__Clostridia;o__Clostridiales;f__Lachnospiraceae;g__s__                                   | 5.43E-04 | 1.83E-01 | 1.43E+00 |
| New.CleanUp.ReferenceOTU177068 | k__Bacteria;p__Firmicutes;c__Clostridia;o__Clostridiales;f__Lachnospiraceae                                          | 5.68E-04 | 5.77E-01 | 1.04E-01 |
| 297301                         | k__Bacteria;p__Bacteroidetes;c__Bacteroidia;o__Bacteroidales;f__g__s__                                               | 5.71E-04 | 3.94E-01 | 1.03E+00 |
| 721150                         | k__Bacteria;p__Bacteroidetes;c__Bacteroidia;o__Bacteroidales;f__[Paraprevotellaceae];g__YRC22;s__                    | 5.72E-04 | 2.54E-01 | 8.51E-01 |
| 4371341                        | k__Bacteria;p__Firmicutes;c__Clostridia;o__Clostridiales;f__Veillonellaceae;g__Phascolarctobacterium;s__             | 5.77E-04 | 1.83E+01 | 4.00E+01 |
| New.CleanUp.ReferenceOTU46514  | k__Bacteria;p__Firmicutes;c__Clostridia;o__Clostridiales;f__Ruminococcaceae;g__s__                                   | 5.90E-04 | 9.58E-01 | 1.34E-01 |
| 306305                         | k__Bacteria;p__Verrucomicrobia;c__Verruco-5;o__WCHB1-41;f__RFP12;g__s__                                              | 5.92E-04 | 8.45E-02 | 5.52E-01 |
| New.CleanUp.ReferenceOTU98374  | k__Bacteria;p__Bacteroidetes;c__Bacteroidia;o__Bacteroidales;f__g__s__                                               | 5.98E-04 | 4.23E-02 | 5.52E-01 |
| 294323                         | k__Bacteria;p__Spirochaetes;c__Spirochaetes;o__Spirochaetales;f__Spirochaetaceae;g__Treponema;s__                    | 6.11E-04 | 6.48E-01 | 2.01E+00 |
| 340727                         | k__Bacteria;p__Bacteroidetes;c__Bacteroidia;o__Bacteroidales;f__g__s__                                               | 6.16E-04 | 2.83E+00 | 5.37E+00 |
| 331309                         | k__Bacteria;p__Firmicutes;c__Clostridia;o__Clostridiales;f__g__s__                                                   | 6.17E-04 | 4.37E-01 | 2.10E+00 |
| 332266                         | k__Bacteria;p__Firmicutes;c__Clostridia;o__Clostridiales;f__g__s__                                                   | 6.24E-04 | 2.72E+00 | 6.24E+00 |
| 4302904                        | k__Bacteria;p__Bacteroidetes;c__Bacteroidia;o__Bacteroidales;f__Bacteroidaceae;g__Bacteroides;s__                    | 6.30E-04 | 4.85E+00 | 2.24E-01 |
| New.CleanUp.ReferenceOTU55952  | k__Bacteria;p__Firmicutes;c__Clostridia;o__Clostridiales;f__Lachnospiraceae;g__Blautia;s__                           | 6.35E-04 | 6.34E-01 | 8.96E-02 |
| 4372003                        | k__Bacteria;p__Bacteroidetes;c__Bacteroidia;o__Bacteroidales;f__Porphyromonadaceae;g__Parabacteroides;s__            | 6.43E-04 | 3.49E+01 | 1.01E+01 |
| 355630                         | k__Bacteria;p__Firmicutes;c__Clostridia;o__Clostridiales;f__Lachnospiraceae;g__s__                                   | 6.48E-04 | 3.32E+00 | 4.48E-01 |
| 4445801                        | k__Bacteria;p__Firmicutes;c__Clostridia;o__Clostridiales;f__g__s__                                                   | 6.59E-04 | 1.66E+00 | 3.33E+00 |
| New.ReferenceOTU445            | k__Bacteria;p__Bacteroidetes;c__Bacteroidia;o__Bacteroidales;f__g__s__                                               | 6.64E-04 | 1.90E+00 | 6.18E+00 |
| New.CleanUp.ReferenceOTU55327  | k__Bacteria;p__Firmicutes;c__Clostridia;o__Clostridiales;f__Ruminococcaceae;g__s__                                   | 6.64E-04 | 7.04E-02 | 1.03E+00 |
| New.ReferenceOTU896            | k__Bacteria;p__Firmicutes;c__Clostridia;o__Clostridiales;f__Lachnospiraceae;g__s__                                   | 6.69E-04 | 1.97E-01 | 5.37E-01 |
| New.CleanUp.ReferenceOTU174505 | k__Bacteria;p__Firmicutes;c__Clostridia;o__Clostridiales;f__Ruminococcaceae;g__s__                                   | 6.77E-04 | 2.68E-01 | 8.51E-01 |
| New.CleanUp.ReferenceOTU132857 | k__Bacteria;p__Firmicutes;c__Clostridia;o__Clostridiales;f__Lachnospiraceae;g__s__                                   | 6.81E-04 | 4.79E-01 | 7.46E-02 |
| 4413619                        | k__Bacteria;p__Firmicutes;c__Clostridia;o__Clostridiales;f__Lachnospiraceae                                          | 6.95E-04 | 1.13E+00 | 4.48E-02 |
| New.CleanUp.ReferenceOTU128500 | k__Bacteria;p__Firmicutes;c__Clostridia;o__Clostridiales;f__g__s__                                                   | 6.95E-04 | 3.24E-01 | 1.16E+00 |
| 537216                         | k__Bacteria;p__Spirochaetes;c__Spirochaetes;o__Spirochaetales;f__Spirochaetaceae;g__Treponema;s__                    | 7.19E-04 | 5.35E-01 | 1.66E+00 |
| 182245                         | k__Bacteria;p__Firmicutes;c__Clostridia;o__Clostridiales;f__Lachnospiraceae;g__[Ruminococcus];s__                    | 7.23E-04 | 1.15E+00 | 0.00E+00 |
| New.CleanUp.ReferenceOTU12256  | k__Bacteria;p__Proteobacteria;c__Deltaproteobacteria;o__Desulfobriviales;f__Desulfobrivionaceae;g__Desulfobrivio;s__ | 7.25E-04 | 3.38E-01 | 0.00E+00 |
| New.ReferenceOTU1002           | k__Bacteria;p__Firmicutes;c__Clostridia;o__Clostridiales;f__Ruminococcaceae;g__Ruminococcus;s__                      | 7.29E-04 | 7.04E-01 | 0.00E+00 |
| 1129680                        | k__Bacteria;p__Firmicutes;c__Bacilli;o__Lactobacillales;f__Carnobacteriaceae;g__Carnobacterium;s__                   | 7.32E-04 | 9.75E+00 | 2.04E+00 |
| 299992                         | k__Bacteria;p__Firmicutes;c__Clostridia;o__Clostridiales;f__Ruminococcaceae;g__s__                                   | 7.32E-04 | 3.94E-01 | 1.28E+00 |
| 4458634                        | k__Bacteria;p__Firmicutes;c__Clostridia;o__Clostridiales;f__Lachnospiraceae;g__[Ruminococcus];s__                    | 7.50E-04 | 1.28E+00 | 2.99E-02 |

|                                |                                                                                                                         |          |          |          |
|--------------------------------|-------------------------------------------------------------------------------------------------------------------------|----------|----------|----------|
| 349887                         | k__Bacteria;p__Firmicutes;c__Clostridia;o__Clostridiales;f__Ruminococcaceae;g__s__                                      | 7.52E-04 | 9.86E-02 | 6.27E-01 |
| New.CleanUp.ReferenceOTU44677  | k__Bacteria;p__Firmicutes;c__Clostridia;o__Clostridiales;f__Lachnospiraceae                                             | 7.56E-04 | 1.31E+00 | 2.69E+00 |
| 300689                         | k__Bacteria;p__Firmicutes;c__Bacilli;o__Lactobacillales;f__Carnobacteriaceae                                            | 7.64E-04 | 1.80E+00 | 1.64E-01 |
| 244041                         | k__Bacteria;p__Firmicutes;c__Clostridia;o__Clostridiales;f__g__s__                                                      | 7.69E-04 | 3.80E-01 | 1.43E+00 |
| 319786                         | k__Bacteria;p__Bacteroidetes;c__Bacteroidia;o__Bacteroidales;f__BS11;g__s__                                             | 7.72E-04 | 4.23E-02 | 2.27E+00 |
| New.ReferenceOTU914            | k__Bacteria;p__Firmicutes;c__Clostridia;o__Clostridiales;f__Christensenellaceae;g__s__                                  | 7.73E-04 | 7.32E-01 | 1.45E+00 |
| 295854                         | k__Bacteria;p__Firmicutes;c__Clostridia;o__Clostridiales;f__Lachnospiraceae;g__s__                                      | 7.78E-04 | 6.34E-01 | 1.48E+00 |
| 4315785                        | k__Bacteria;p__Firmicutes;c__Clostridia;o__Clostridiales;f__Ruminococcaceae;g__s__                                      | 7.97E-04 | 4.23E-02 | 5.67E-01 |
| New.ReferenceOTU293            | k__Bacteria;p__Firmicutes;c__Clostridia;o__Clostridiales;f__Clostridiaceae;g__Sarcina;s__                               | 8.01E-04 | 5.63E-01 | 1.61E+00 |
| 190649                         | k__Bacteria;p__Firmicutes;c__Clostridia;o__Clostridiales;f__Ruminococcaceae;g__s__                                      | 8.03E-04 | 1.93E+00 | 1.49E-01 |
| 131039                         | k__Bacteria;p__Firmicutes;c__Clostridia;o__Clostridiales;f__Ruminococcaceae;g__Oscillospira;s__                         | 8.11E-04 | 3.35E+00 | 5.07E-01 |
| 350834                         | k__Bacteria;p__Firmicutes;c__Clostridia;o__Clostridiales;f__Christensenellaceae;g__s__                                  | 8.11E-04 | 1.55E-01 | 5.52E-01 |
| 288026                         | k__Bacteria;p__Firmicutes;c__Clostridia;o__Clostridiales;f__g__s__                                                      | 8.38E-04 | 5.07E-01 | 1.49E-02 |
| 194286                         | k__Bacteria;p__Bacteroidetes;c__Bacteroidia;o__Bacteroidales;f__Porphyromonadaceae;g__Parabacteroides;s__               | 8.38E-04 | 3.18E+00 | 1.19E-01 |
| 23625                          | k__Bacteria;p__Proteobacteria;c__Deltaproteobacteria;o__GMD14H09;f__g__s__                                              | 8.39E-04 | 1.65E+00 | 2.99E-02 |
| 175967                         | k__Bacteria;p__Firmicutes;c__Clostridia;o__Clostridiales;f__g__s__                                                      | 8.58E-04 | 6.76E-01 | 2.99E-02 |
| New.CleanUp.ReferenceOTU124455 | k__Bacteria;p__Firmicutes;c__Bacilli;o__Lactobacillales;f__Lactobacillaceae;g__Lactobacillus;s__reuteri                 | 8.62E-04 | 3.80E-01 | 1.49E-02 |
| 565033                         | k__Archaea;p__Euryarchaeota;c__Methanomicrobia;o__Methanomicrobiales;f__Methanocorpusculaceae;g__Methanocorpusculum;s__ | 8.65E-04 | 4.23E-01 | 2.07E+00 |
| New.CleanUp.ReferenceOTU179654 | k__Bacteria;p__Firmicutes;c__Clostridia;o__Clostridiales;f__g__s__                                                      | 8.69E-04 | 4.08E-01 | 1.49E-02 |
| 3931537                        | k__Bacteria;p__Firmicutes;c__Clostridia;o__Clostridiales;f__Ruminococcaceae;g__s__                                      | 8.71E-04 | 1.48E+00 | 3.73E-01 |
| 3409363                        | k__Bacteria;p__Firmicutes;c__Clostridia;o__Clostridiales;f__Lachnospiraceae;g__Dorea;s__                                | 8.72E-04 | 4.93E-01 | 2.99E-02 |
| 4453304                        | k__Bacteria;p__Firmicutes;c__Clostridia;o__Clostridiales;f__Lachnospiraceae;g__s__                                      | 8.72E-04 | 1.21E+00 | 7.61E-01 |
| New.CleanUp.ReferenceOTU52247  | k__Bacteria;p__Verrucomicrobia;c__Verruco-5;o__WCHB1-41;f__RFP12;g__s__                                                 | 8.76E-04 | 5.63E-02 | 2.06E+00 |
| 228140                         | k__Bacteria;p__Firmicutes;c__Clostridia;o__Clostridiales;f__Clostridiaceae;g__s__                                       | 8.76E-04 | 2.80E+00 | 3.73E-01 |
| 1146771                        | k__Bacteria;p__Firmicutes;c__Clostridia;o__Clostridiales;f__Christensenellaceae;g__Christensenella;s__                  | 8.78E-04 | 3.94E-01 | 1.49E-02 |
| 3407052                        | k__Bacteria;p__Bacteroidetes;c__Bacteroidia;o__Bacteroidales;f__Bacteroidaceae;g__Bacteroides;s__                       | 8.79E-04 | 6.62E-01 | 3.70E+00 |
| New.CleanUp.ReferenceOTU67939  | k__Bacteria;p__Bacteroidetes;c__Bacteroidia;o__Bacteroidales;f__g__s__                                                  | 8.85E-04 | 0.00E+00 | 2.12E+00 |
| New.CleanUp.ReferenceOTU117040 | k__Bacteria;p__Firmicutes;c__Clostridia;o__Clostridiales;f__Ruminococcaceae;g__Ruminococcus;s__                         | 8.89E-04 | 0.00E+00 | 1.00E+00 |
| 4353913                        | k__Bacteria;p__Firmicutes;c__Clostridia;o__Clostridiales;f__g__s__                                                      | 8.93E-04 | 8.31E-01 | 1.64E-01 |
| New.ReferenceOTU452            | k__Bacteria;p__Firmicutes;c__Clostridia;o__Clostridiales;f__Ruminococcaceae;g__s__                                      | 9.02E-04 | 6.20E-01 | 5.97E-02 |
| 4452764                        | k__Bacteria;p__Firmicutes;c__Clostridia;o__Clostridiales;f__g__s__                                                      | 9.10E-04 | 1.97E-01 | 8.81E-01 |
| 19080                          | k__Bacteria;p__Firmicutes;c__Clostridia;o__Clostridiales;f__Ruminococcaceae;g__s__                                      | 9.17E-04 | 1.94E+00 | 4.78E-01 |

|                                |                                                                                                           |          |          |          |
|--------------------------------|-----------------------------------------------------------------------------------------------------------|----------|----------|----------|
| 556163                         | k__Bacteria;p__Firmicutes;c__Clostridia;o__Clostridiales;f__Clostridiaceae;g__;                           | 9.84E-04 | 1.41E-02 | 4.12E+00 |
| 543491                         | k__Bacteria;p__Actinobacteria;c__Actinobacteria;o__Actinomycetales;f__Micrococccaceae;g__;                | 1.00E-03 | 1.38E+00 | 2.99E+01 |
| New.CleanUp.ReferenceOTU158944 | k__Bacteria;p__Chloroflexi;c__Anaerolineae;o__Anaerolineales;f__Anaerolinaceae;g__SHD-231;s__             | 1.00E-03 | 1.41E-02 | 7.76E+01 |
| 341139                         | k__Bacteria;p__Firmicutes;c__Clostridia;o__Clostridiales;f__Lachnospiraceae;g__;                          | 1.03E-03 | 2.28E+00 | 5.07E+01 |
| 297502                         | k__Bacteria;p__Firmicutes;c__Clostridia;o__Clostridiales;f__Lachnospiraceae;g__;                          | 1.03E-03 | 1.08E+00 | 4.48E+02 |
| 303224                         | k__Bacteria;p__Firmicutes;c__Clostridia;o__Clostridiales;f__Lachnospiraceae;g__Blautia;s__                | 1.04E-03 | 7.54E+00 | 9.40E+01 |
| New.ReferenceOTU448            | k__Bacteria;p__Armatimonadetes;c__SJA-176;o__RB046;f__g__;                                                | 1.06E-03 | 5.80E+00 | 1.27E+01 |
| New.CleanUp.ReferenceOTU96977  | k__Bacteria;p__Firmicutes;c__Clostridia;o__Clostridiales;f__Lachnospiraceae;g__;                          | 1.09E-03 | 1.83E+01 | 8.66E+01 |
| 339530                         | k__Bacteria;p__Firmicutes;c__Clostridia;o__Clostridiales;f__g__;                                          | 1.10E-03 | 2.96E+01 | 2.75E+00 |
| 338534                         | k__Bacteria;p__Bacteroidetes;c__Bacteroidia;o__Bacteroidales;f__g__;                                      | 1.11E-03 | 1.69E+01 | 9.70E+01 |
| 310136                         | k__Bacteria;p__Firmicutes;c__Clostridia;o__Clostridiales;f__g__;                                          | 1.11E-03 | 2.11E+01 | 1.04E+00 |
| 291054                         | k__Bacteria;p__Firmicutes;c__Clostridia;o__Clostridiales;f__Ruminococcaceae;g__;                          | 1.11E-03 | 1.03E+00 | 3.73E+00 |
| 4339144                        | k__Bacteria;p__Bacteroidetes;c__Bacteroidia;o__Bacteroidales;f__[Odoribacteraceae];g__Butyricimonas;s__   | 1.12E-03 | 1.18E+00 | 3.73E+01 |
| 525378                         | k__Bacteria;p__Firmicutes;c__Clostridia;o__Clostridiales;f__Lachnospiraceae;g__Blautia;s__                | 1.12E-03 | 2.96E+01 | 7.76E+01 |
| New.CleanUp.ReferenceOTU177938 | k__Bacteria;p__Bacteroidetes;c__Bacteroidia;o__Bacteroidales;f__Prevotellaceae;g__Prevotella;s__          | 1.13E-03 | 1.13E+01 | 1.09E+00 |
| 4355718                        | k__Bacteria;p__Actinobacteria;c__Actinobacteria;o__Actinomycetales;f__Actinomycetaceae;g__Actinomyces;s__ | 1.13E-03 | 2.63E+00 | 7.55E+00 |
| 2510541                        | k__Bacteria;p__Firmicutes;c__Clostridia;o__Clostridiales;f__Lachnospiraceae;g__Coproccoccus;s__           | 1.14E-03 | 3.94E+01 | 3.54E+00 |
| 325179                         | k__Bacteria;p__Bacteroidetes;c__Bacteroidia;o__Bacteroidales;f__g__;                                      | 1.15E-03 | 3.80E+01 | 2.49E+00 |
| 757005                         | k__Bacteria;p__Firmicutes;c__Bacilli;o__Bacillales;f__Planococcaceae;g__Rummeleibacillus;s__              | 1.16E-03 | 3.68E+01 | 8.02E+01 |
| New.CleanUp.ReferenceOTU6662   | k__Bacteria;p__Tenericutes;c__Mollicutes;o__RF39;f__g__;                                                  | 1.19E-03 | 2.82E+02 | 7.16E+01 |
| 192385                         | k__Bacteria;p__Firmicutes;c__Clostridia;o__Clostridiales;f__g__;                                          | 1.20E-03 | 6.06E+01 | 1.19E+01 |
| 295109                         | k__Bacteria;p__Verrucomicrobia;c__Verruco-5;o__WCHB1-41;f__RFP12;g__;                                     | 1.22E-03 | 2.82E+02 | 1.39E+00 |
| 4428037                        | k__Bacteria;p__Verrucomicrobia;c__Verruco-5;o__WCHB1-41;f__RFP12;g__;                                     | 1.22E-03 | 5.63E+01 | 1.60E+00 |
| 2875735                        | k__Bacteria;p__Bacteroidetes;c__Bacteroidia;o__Bacteroidales;f__Bacteroidaceae;g__Bacteroides;s__         | 1.24E-03 | 2.17E+00 | 8.06E+01 |
| 1857626                        | k__Bacteria;p__Firmicutes;c__Clostridia;o__Clostridiales;f__g__;                                          | 1.26E-03 | 1.68E+00 | 0.00E+00 |
| New.CleanUp.ReferenceOTU171806 | k__Bacteria;p__Spirochaetes;c__Spirochaetes;o__Spirochaetales;f__Spirochaetaceae;g__Treponema;s__         | 1.27E-03 | 5.63E+02 | 4.03E+01 |
| New.CleanUp.ReferenceOTU26099  | k__Bacteria;p__Firmicutes;c__Clostridia;o__Clostridiales;f__Lachnospiraceae;g__Dorea;s__                  | 1.27E-03 | 3.52E+01 | 0.00E+00 |
| New.CleanUp.ReferenceOTU106721 | k__Bacteria;p__Firmicutes;c__Clostridia;o__Clostridiales;f__Ruminococcaceae;g__Ruminococcus;s__           | 1.27E-03 | 1.01E+00 | 0.00E+00 |
| New.CleanUp.ReferenceOTU56565  | k__Bacteria;p__Firmicutes;c__Clostridia;o__Clostridiales;f__g__;                                          | 1.27E-03 | 5.49E+01 | 0.00E+00 |
| 4301298                        | k__Bacteria;p__Bacteroidetes;c__Bacteroidia;o__Bacteroidales;f__Bacteroidaceae;g__Bacteroides;s__         | 1.28E-03 | 5.63E+01 | 0.00E+00 |
| New.ReferenceOTU475            | k__Bacteria;p__Firmicutes;c__Clostridia;o__Clostridiales;f__g__;                                          | 1.28E-03 | 4.65E+01 | 1.51E+00 |
| 25562                          | k__Bacteria;p__Proteobacteria;c__Betaproteobacteria;o__Tremblayales;f__g__;                               | 1.30E-03 | 1.12E+01 | 1.29E+01 |

|                                |                                                                                                                   |          |          |          |
|--------------------------------|-------------------------------------------------------------------------------------------------------------------|----------|----------|----------|
| 22371                          | k__Bacteria;p__Firmicutes;c__Clostridia;o__Clostridiales;f__Lachnospiraceae;g__<br>;s__                           | 1.32E-03 | 2.06E+00 | 7.46E-02 |
| 4338990                        | k__Bacteria;p__Firmicutes;c__Clostridia;o__Clostridiales;f__Ruminococcaceae;g__<br>;s__                           | 1.32E-03 | 1.97E-01 | 1.37E+00 |
| 212807                         | k__Bacteria;p__Firmicutes;c__Clostridia;o__Clostridiales;f__Ruminococcaceae;g__<br>;s__                           | 1.32E-03 | 9.30E-01 | 2.99E-02 |
| 292866                         | k__Bacteria;p__Firmicutes;c__Clostridia;o__Clostridiales;f__<br>;g__;s__                                          | 1.32E-03 | 8.45E-02 | 4.18E-01 |
| 166911                         | k__Bacteria;p__Firmicutes;c__Bacilli;o__Lactobacillales;f__Lactobacillaceae;g__<br>Lactobacillus;s__              | 1.33E-03 | 6.54E+00 | 3.07E+00 |
| 323189                         | k__Bacteria;p__Firmicutes;c__Clostridia;o__Clostridiales;f__<br>;g__;s__                                          | 1.35E-03 | 4.23E-02 | 6.57E-01 |
| 297256                         | k__Bacteria;p__Firmicutes;c__Clostridia;o__Clostridiales;f__Ruminococcaceae;g__<br>;s__                           | 1.38E-03 | 1.14E+00 | 3.27E+00 |
| 326014                         | k__Bacteria;p__Firmicutes;c__Clostridia;o__Clostridiales;f__<br>;g__;s__                                          | 1.39E-03 | 4.23E-02 | 5.07E-01 |
| New.ReferenceOTU65             | k__Bacteria;p__Firmicutes;c__Clostridia;o__Clostridiales;f__Ruminococcaceae;g__<br>;s__                           | 1.40E-03 | 1.41E-01 | 1.58E+00 |
| 2250985                        | k__Bacteria;p__Firmicutes;c__Clostridia;o__Clostridiales;f__Lachnospiraceae;g__<br>_Roseburia;s__                 | 1.41E-03 | 1.46E+00 | 8.36E-01 |
| 292914                         | k__Bacteria;p__Bacteroidetes;c__Bacteroidia;o__Bacteroidales;f__<br>;g__;s__                                      | 1.42E-03 | 1.27E-01 | 1.01E+00 |
| New.CleanUp.ReferenceOTU30868  | k__Bacteria;p__Firmicutes;c__Clostridia;o__Clostridiales;f__[Mogibacteriaceae];<br>g__<br>;s__                    | 1.46E-03 | 7.04E-02 | 5.37E-01 |
| 295361                         | k__Bacteria;p__Firmicutes;c__Clostridia;o__Clostridiales;f__<br>;g__;s__                                          | 1.48E-03 | 4.23E-01 | 1.49E-02 |
| New.CleanUp.ReferenceOTU96981  | k__Bacteria;p__Firmicutes;c__Clostridia;o__Clostridiales;f__Lachnospiraceae                                       | 1.48E-03 | 5.07E-01 | 1.49E-02 |
| 4447072                        | k__Bacteria;p__Bacteroidetes;c__Bacteroidia;o__Bacteroidales;f__Bacteroidaceae;<br>g__Bacteroides;s__             | 1.50E-03 | 1.54E+00 | 4.93E-01 |
| 238830                         | k__Bacteria;p__Actinobacteria;c__Actinobacteria;o__Actinomycetales;f__Actinomycetaceae;<br>g__Arcanobacterium;s__ | 1.50E-03 | 5.21E-01 | 3.36E+00 |
| 4307974                        | k__Bacteria;p__Firmicutes;c__Clostridia;o__Clostridiales;f__[Mogibacteriaceae];<br>g__<br>;s__                    | 1.51E-03 | 5.49E-01 | 1.49E-02 |
| New.CleanUp.ReferenceOTU138642 | k__Bacteria;p__Bacteroidetes;c__Bacteroidia;o__Bacteroidales;f__<br>;g__;s__                                      | 1.51E-03 | 9.86E-02 | 4.93E-01 |
| 293471                         | k__Bacteria;p__Firmicutes;c__Clostridia;o__Clostridiales;f__Ruminococcaceae;g__<br>;s__                           | 1.51E-03 | 5.89E+00 | 1.16E+01 |
| 4428676                        | k__Bacteria;p__Firmicutes;c__Clostridia;o__Clostridiales;f__Lachnospiraceae;g__<br>_Coprococcus;s__               | 1.52E-03 | 8.31E-01 | 1.49E-02 |
| 839964                         | k__Bacteria;p__Firmicutes;c__Clostridia;o__Clostridiales;f__Ruminococcaceae;g__<br>_Oscillospira;s__              | 1.52E-03 | 7.32E-01 | 1.49E-02 |
| New.ReferenceOTU360            | k__Bacteria;p__Bacteroidetes;c__Bacteroidia;o__Bacteroidales;f__<br>;g__;s__                                      | 1.52E-03 | 8.73E-01 | 2.45E+00 |
| 4089774                        | k__Bacteria;p__Firmicutes;c__Clostridia;o__Clostridiales;f__Lachnospiraceae;g__<br>_Blautia;s__producta           | 1.53E-03 | 4.37E-01 | 1.49E-02 |
| 4433417                        | k__Bacteria;p__Firmicutes;c__Clostridia;o__Clostridiales;f__Lachnospiraceae                                       | 1.55E-03 | 3.38E-01 | 1.49E-02 |
| 528266                         | k__Bacteria;p__Firmicutes;c__Clostridia;o__Clostridiales;f__Lachnospiraceae;g__<br>;s__                           | 1.58E-03 | 4.23E-01 | 2.99E-02 |
| 4316193                        | k__Bacteria;p__Actinobacteria;c__Actinobacteria;o__Actinomycetales;f__Micrococcaceae;<br>g__Arthrobacter;s__      | 1.60E-03 | 1.64E+01 | 5.57E+00 |
| New.ReferenceOTU314            | k__Bacteria;p__Firmicutes;c__Clostridia;o__Clostridiales;f__Ruminococcaceae;g__<br>;s__                           | 1.61E-03 | 3.23E+00 | 3.34E+00 |
| 174415                         | k__Bacteria;p__Firmicutes;c__Clostridia;o__Clostridiales;f__Lachnospiraceae;g__<br>_Dorea;s__                     | 1.62E-03 | 1.39E+00 | 5.97E-02 |
| New.ReferenceOTU757            | k__Bacteria;p__Firmicutes;c__Clostridia;o__Clostridiales;f__Ruminococcaceae;g__<br>;s__                           | 1.62E-03 | 3.66E-01 | 8.66E-01 |
| New.CleanUp.ReferenceOTU155616 | k__Bacteria;p__Firmicutes;c__Clostridia;o__Clostridiales;f__<br>;g__;s__                                          | 1.63E-03 | 0.00E+00 | 3.58E-01 |
| New.ReferenceOTU637            | k__Bacteria;p__Firmicutes;c__Clostridia;o__Clostridiales;f__<br>;g__;s__                                          | 1.63E-03 | 6.34E-01 | 1.24E+00 |
| 300152                         | k__Bacteria;p__Firmicutes;c__Clostridia;o__Clostridiales;f__<br>;g__;s__                                          | 1.65E-03 | 2.82E-02 | 4.78E-01 |

|                                |                                                                                                                     |          |          |          |
|--------------------------------|---------------------------------------------------------------------------------------------------------------------|----------|----------|----------|
| 195081                         | k__Bacteria;p__Firmicutes;c__Clostridia;o__Clostridiales;f__Lachnospiraceae;g__Dorea;s__                            | 1.68E-03 | 5.92E-01 | 7.46E-02 |
| 292216                         | k__Bacteria;p__Firmicutes;c__Clostridia;o__Clostridiales;f__Lachnospiraceae;g__Dorea;s__                            | 1.70E-03 | 8.59E-01 | 1.49E-01 |
| 192437                         | k__Bacteria;p__Firmicutes;c__Clostridia;o__Clostridiales;f__g__s__                                                  | 1.71E-03 | 2.96E-01 | 7.61E-01 |
| New.ReferenceOTU537            | k__Bacteria;p__Firmicutes;c__Clostridia;o__Clostridiales;f__Lachnospiraceae;g__Dorea;s__                            | 1.71E-03 | 5.49E-01 | 5.97E-02 |
| 311412                         | k__Bacteria;p__Firmicutes;c__Clostridia;o__Clostridiales;f__g__s__                                                  | 1.72E-03 | 1.13E+00 | 1.85E+00 |
| New.ReferenceOTU77             | k__Bacteria;p__Firmicutes;c__Clostridia;o__Clostridiales;f__Lachnospiraceae;g__s__                                  | 1.72E-03 | 7.61E-01 | 8.96E-02 |
| 292529                         | k__Bacteria;p__Bacteroidetes;c__Bacteroidia;o__Bacteroidales;f__[Paraprevotellaceae];g__YRC22;s__                   | 1.73E-03 | 2.82E-02 | 6.12E-01 |
| 584020                         | k__Bacteria;p__Firmicutes;c__Clostridia;o__Clostridiales;f__g__s__                                                  | 1.73E-03 | 1.45E+00 | 2.99E-02 |
| 290864                         | k__Bacteria;p__Firmicutes;c__Erysipelotrichi;o__Erysipelotrichales;f__Erysipelotrichaceae;g__p-75-a5;s__            | 1.75E-03 | 9.86E-02 | 8.06E-01 |
| 356624                         | k__Bacteria;p__Firmicutes;c__Clostridia;o__Clostridiales;f__[Mogibacteriaceae];g__s__                               | 1.76E-03 | 8.03E-01 | 1.81E+00 |
| 999814                         | k__Bacteria;p__Firmicutes;c__Bacilli;o__Bacillales;f__Staphylococcaceae;g__Jeotgalicoccus;s__                       | 1.77E-03 | 2.38E+00 | 4.48E-02 |
| 3265161                        | k__Bacteria;p__Firmicutes;c__Clostridia;o__Clostridiales;f__Lachnospiraceae;g__Roseburia;s__                        | 1.77E-03 | 1.01E+00 | 3.43E-01 |
| 644244                         | k__Bacteria;p__Firmicutes;c__Clostridia;o__Clostridiales;f__Christensenellaceae;g__s__                              | 1.79E-03 | 4.13E+00 | 1.19E-01 |
| 290496                         | k__Bacteria;p__Verrucomicrobia;c__Verruco-5;o__WCHB1-41;f__RFP12;g__s__                                             | 1.84E-03 | 1.41E-02 | 3.28E-01 |
| 268361                         | k__Bacteria;p__Proteobacteria;c__Gammaproteobacteria;o__Pseudomonadales;f__Moraxellaceae;g__s__                     | 1.86E-03 | 1.94E+00 | 7.46E-02 |
| 296717                         | k__Bacteria;p__Firmicutes;c__Clostridia;o__Clostridiales;f__g__s__                                                  | 1.89E-03 | 5.85E+00 | 2.23E+01 |
| 167463                         | k__Bacteria;p__Firmicutes;c__Clostridia;o__Clostridiales;f__g__s__                                                  | 1.92E-03 | 8.45E-02 | 5.22E-01 |
| New.ReferenceOTU309            | k__Bacteria;p__Firmicutes;c__Clostridia;o__Clostridiales;f__g__s__                                                  | 1.93E-03 | 2.68E-01 | 1.34E+00 |
| 298804                         | k__Bacteria;p__Firmicutes;c__Clostridia;o__Clostridiales;f__Ruminococcaceae;g__s__                                  | 1.95E-03 | 1.05E+02 | 1.03E+02 |
| New.CleanUp.ReferenceOTU30377  | k__Bacteria;p__Firmicutes;c__Clostridia;o__Clostridiales;f__[Mogibacteriaceae];g__Anaerovorax;s__                   | 1.95E-03 | 1.55E-01 | 9.40E-01 |
| New.CleanUp.ReferenceOTU109609 | k__Bacteria;p__Synergistetes;c__Synergistia;o__Synergistales;f__Synergistaceae;g__s__                               | 1.97E-03 | 4.23E-02 | 1.67E+00 |
| 300620                         | k__Bacteria;p__Firmicutes;c__Clostridia;o__Clostridiales;f__Ruminococcaceae;g__s__                                  | 1.97E-03 | 2.82E-02 | 7.16E-01 |
| 509596                         | k__Bacteria;p__Firmicutes;c__Clostridia;o__Clostridiales;f__g__s__                                                  | 2.02E-03 | 2.54E-01 | 1.66E+00 |
| 306146                         | k__Bacteria;p__Firmicutes;c__Clostridia;o__Clostridiales;f__Clostridiaceae;g__s__                                   | 2.03E-03 | 7.61E-01 | 2.84E+00 |
| 1945397                        | k__Bacteria;p__Firmicutes;c__Clostridia;o__Clostridiales;f__g__s__                                                  | 2.03E-03 | 5.77E-01 | 5.97E-02 |
| 112158                         | k__Bacteria;p__Actinobacteria;c__Actinobacteria;o__Actinomycetales;f__Corynebacteriaceae;g__Corynebacterium;s__     | 2.04E-03 | 1.00E+00 | 7.46E-02 |
| New.CleanUp.ReferenceOTU13023  | k__Bacteria;p__Bacteroidetes;c__Bacteroidia;o__Bacteroidales;f__[Paraprevotellaceae];g__CF231;s__                   | 2.06E-03 | 5.63E-02 | 9.55E-01 |
| 532922                         | k__Bacteria;p__Firmicutes;c__Clostridia;o__Clostridiales;f__Ruminococcaceae;g__Oscillospira;s__                     | 2.09E-03 | 9.58E-01 | 7.46E-02 |
| New.ReferenceOTU299            | k__Bacteria;p__Fibrobacteres;c__Fibrobacteria;o__Fibrobacterales;f__Fibrobacteraceae;g__Fibrobacter;s__succinogenes | 2.12E-03 | 1.41E-01 | 9.55E-01 |
| 291927                         | k__Bacteria;p__Bacteroidetes;c__Bacteroidia;o__Bacteroidales;f__Prevotellaceae;g__Prevotella;s__                    | 2.16E-03 | 5.63E-02 | 5.07E-01 |
| 187404                         | k__Bacteria;p__Firmicutes;c__Clostridia;o__Clostridiales;f__Ruminococcaceae;g__s__                                  | 2.17E-03 | 1.37E+00 | 8.96E-02 |
| 323106                         | k__Bacteria;p__Firmicutes;c__Clostridia;o__Clostridiales;f__Lachnospiraceae;g__s__                                  | 2.18E-03 | 4.23E-01 | 0.00E+00 |



|                                |                                                                                                                      |          |          |          |
|--------------------------------|----------------------------------------------------------------------------------------------------------------------|----------|----------|----------|
| 314710                         | k__Bacteria;p__Firmicutes;c__Clostridia;o__Clostridiales;f__g__s__                                                   | 2.18E-03 | 2.11E-01 | 6.87E-01 |
| 290542                         | k__Bacteria;p__Firmicutes;c__Clostridia;o__Clostridiales;f__g__s__                                                   | 2.19E-03 | 3.93E+00 | 9.90E+00 |
| New.CleanUp.ReferenceOTU31803  | Unassigned                                                                                                           | 2.19E-03 | 1.13E-01 | 1.66E+00 |
| 2829179                        | k__Bacteria;p__Firmicutes;c__Clostridia;o__Clostridiales;f__Veillonellaceae;g__Acidaminococcus;s__                   | 2.19E-03 | 5.21E-01 | 0.00E+00 |
| New.CleanUp.ReferenceOTU78219  | k__Bacteria;p__Firmicutes;c__Clostridia;o__Clostridiales;f__Lachnospiraceae;g__Blautia;s__producta                   | 2.20E-03 | 3.24E-01 | 0.00E+00 |
| 183686                         | k__Bacteria;p__Firmicutes;c__Clostridia;o__Clostridiales;f__Ruminococcaceae;g__s__                                   | 2.20E-03 | 8.87E-01 | 0.00E+00 |
| New.CleanUp.ReferenceOTU143072 | k__Bacteria;p__Firmicutes;c__Clostridia;o__Clostridiales;f__[Mogibacteriaceae];g__s__                                | 2.21E-03 | 7.75E-01 | 0.00E+00 |
| New.CleanUp.ReferenceOTU78716  | k__Bacteria;p__Bacteroidetes;c__Bacteroidia;o__Bacteroidales;f__Bacteroidaceae;g__Bacteroides;s__fragilis            | 2.22E-03 | 7.32E-01 | 4.48E-02 |
| New.CleanUp.ReferenceOTU155521 | k__Bacteria;p__Bacteroidetes;c__Bacteroidia;o__Bacteroidales;f__g__s__                                               | 2.23E-03 | 4.23E-02 | 4.48E-01 |
| 177663                         | k__Bacteria;p__Firmicutes;c__Clostridia;o__Clostridiales;f__Ruminococcaceae;g__s__                                   | 2.24E-03 | 6.99E+00 | 4.93E-01 |
| New.CleanUp.ReferenceOTU180617 | k__Bacteria;p__Firmicutes;c__Clostridia;o__Clostridiales;f__Ruminococcaceae;g__s__                                   | 2.28E-03 | 3.66E-01 | 9.25E-01 |
| New.CleanUp.ReferenceOTU100096 | k__Bacteria;p__Firmicutes;c__Clostridia;o__Clostridiales;f__Ruminococcaceae;g__Ruminococcus;s__                      | 2.31E-03 | 1.01E+00 | 2.39E+00 |
| 326721                         | k__Bacteria;p__Firmicutes;c__Bacilli;o__Lactobacillales;f__Lactobacillaceae;g__Lactobacillus;s__                     | 2.33E-03 | 4.24E+00 | 1.18E+00 |
| 195937                         | k__Bacteria;p__Firmicutes;c__Clostridia;o__Clostridiales;f__Lachnospiraceae;g__Blautia;s__                           | 2.34E-03 | 4.10E+00 | 8.81E-01 |
| 288004                         | k__Bacteria;p__Actinobacteria;c__Coriobacteriia;o__Coriobacteriales;f__Coriobacteriaceae;g__Collinsella;s__stercoris | 2.38E-03 | 9.86E-02 | 1.21E+00 |
| New.CleanUp.ReferenceOTU40450  | Unassigned                                                                                                           | 2.44E-03 | 3.94E-01 | 1.42E+00 |
| 296528                         | k__Bacteria;p__Spirochaetes;c__Spirochaetes;o__Spirochaetales;f__Spirochaetaceae;g__Treponema;s__                    | 2.45E-03 | 8.45E-02 | 4.18E-01 |
| 4352747                        | k__Bacteria;p__Bacteroidetes;c__Bacteroidia;o__Bacteroidales;f__Bacteroidaceae;g__Bacteroides;s__                    | 2.48E-03 | 1.42E+00 | 2.99E-02 |
| 3472078                        | k__Bacteria;p__Bacteroidetes;c__Bacteroidia;o__Bacteroidales;f__Bacteroidaceae;g__Bacteroides;s__ovatus              | 2.49E-03 | 1.85E+00 | 3.28E-01 |
| 292255                         | k__Bacteria;p__Firmicutes;c__Clostridia;o__Clostridiales;f__g__s__                                                   | 2.50E-03 | 3.24E-01 | 1.06E+00 |
| 4439360                        | k__Bacteria;p__Bacteroidetes;c__Bacteroidia;o__Bacteroidales;f__Bacteroidaceae;g__Bacteroides;s__                    | 2.50E-03 | 6.24E+00 | 1.21E+00 |
| New.CleanUp.ReferenceOTU71517  | Unassigned                                                                                                           | 2.50E-03 | 5.63E-02 | 4.48E-01 |
| 293363                         | k__Bacteria;p__Fibrobacteres;c__Fibrobacteria;o__Fibrobacterales;f__Fibrobacteraceae;g__Fibrobacter;s__succinogenes  | 2.50E-03 | 1.41E-01 | 1.87E+00 |
| New.ReferenceOTU957            | k__Bacteria;p__Firmicutes;c__Clostridia;o__Clostridiales;f__Lachnospiraceae;g__Coproccoccus;s__                      | 2.51E-03 | 1.11E+00 | 2.30E+00 |
| New.ReferenceOTU779            | k__Bacteria;p__Firmicutes;c__Clostridia;o__Clostridiales;f__Clostridiaceae;g__s__                                    | 2.53E-03 | 1.52E+00 | 3.52E+00 |
| New.CleanUp.ReferenceOTU79069  | k__Bacteria;p__Firmicutes;c__Clostridia;o__Clostridiales;f__Ruminococcaceae;g__s__                                   | 2.53E-03 | 1.41E-01 | 8.96E-01 |
| New.CleanUp.ReferenceOTU162067 | k__Bacteria;p__Bacteroidetes;c__Bacteroidia;o__Bacteroidales;f__[Paraprevotellaceae];g__CF231;s__                    | 2.55E-03 | 4.23E-02 | 4.78E-01 |
| New.ReferenceOTU720            | k__Bacteria;p__Actinobacteria;c__Coriobacteriia;o__Coriobacteriales;f__Coriobacteriaceae                             | 2.56E-03 | 1.97E+00 | 4.45E+00 |
| 213337                         | k__Bacteria;p__Firmicutes;c__Clostridia;o__Clostridiales;f__[Mogibacteriaceae];g__s__                                | 2.56E-03 | 6.20E-01 | 1.22E+00 |
| 553080                         | k__Bacteria;p__Firmicutes;c__Clostridia;o__Clostridiales;f__Ruminococcaceae;g__s__                                   | 2.56E-03 | 2.61E+00 | 1.04E-01 |
| 2386814                        | k__Bacteria;p__Firmicutes;c__Clostridia;o__Clostridiales;f__Lachnospiraceae;g__s__                                   | 2.56E-03 | 2.39E-01 | 1.55E+00 |
| 47365                          | k__Bacteria;p__Firmicutes;c__Bacilli;o__Lactobacillales;f__Lactobacillaceae;g__Lactobacillus;s__                     | 2.56E-03 | 2.43E+01 | 1.21E+01 |

|                                |                                                                                                                        |          |          |          |
|--------------------------------|------------------------------------------------------------------------------------------------------------------------|----------|----------|----------|
| New.ReferenceOTU412            | k__Bacteria;p__Firmicutes;c__Clostridia;o__Clostridiales;f__Ruminococcaceae;g__s__                                     | 2.58E-03 | 9.08E+00 | 1.47E+01 |
| New.CleanUp.ReferenceOTU72309  | k__Bacteria;p__Firmicutes;c__Clostridia;o__Clostridiales;f__Ruminococcaceae;g__s__                                     | 2.58E-03 | 7.04E-01 | 1.49E-02 |
| 182188                         | k__Bacteria;p__Firmicutes;c__Clostridia;o__Clostridiales;f__g__s__                                                     | 2.58E-03 | 1.04E+00 | 1.49E-02 |
| New.CleanUp.ReferenceOTU92821  | k__Bacteria;p__Firmicutes;c__Clostridia;o__Clostridiales;f__g__s__                                                     | 2.61E-03 | 4.93E-01 | 1.49E-02 |
| 270722                         | k__Bacteria;p__Firmicutes;c__Clostridia;o__Clostridiales;f__Ruminococcaceae;g__Ruminococcus;s__flavofaciens            | 2.62E-03 | 1.10E+00 | 1.51E+00 |
| New.CleanUp.ReferenceOTU13303  | k__Bacteria;p__Firmicutes;c__Clostridia;o__Clostridiales;f__Lachnospiraceae;g__Coprococcus;s__                         | 2.63E-03 | 5.35E-01 | 2.99E-02 |
| 347103                         | k__Bacteria;p__Bacteroidetes;c__Bacteroidia;o__Bacteroidales;f__g__s__                                                 | 2.64E-03 | 2.96E-01 | 1.84E+00 |
| 192832                         | k__Bacteria;p__Firmicutes;c__Bacilli;o__Lactobacillales;f__Lactobacillaceae;g__Lactobacillus;s__                       | 2.69E-03 | 2.96E-01 | 1.49E-02 |
| 320961                         | k__Bacteria;p__Firmicutes;c__Clostridia;o__Clostridiales;f__Ruminococcaceae;g__s__                                     | 2.70E-03 | 2.31E+00 | 5.78E+00 |
| 630141                         | k__Bacteria;p__Firmicutes;c__Bacilli;o__Bacillales;f__Staphylococcaceae;g__Staphylococcus;s__                          | 2.73E-03 | 2.32E+00 | 1.94E-01 |
| 295258                         | k__Bacteria;p__Firmicutes;c__Clostridia;o__Clostridiales;f__Ruminococcaceae;g__s__                                     | 2.74E-03 | 2.56E+00 | 1.06E+00 |
| New.CleanUp.ReferenceOTU24803  | k__Bacteria;p__Firmicutes;c__Clostridia;o__Clostridiales;f__Lachnospiraceae;g__Blautia;s__producta                     | 2.74E-03 | 3.80E-01 | 2.99E-02 |
| 331435                         | k__Bacteria;p__Firmicutes;c__Clostridia;o__Clostridiales;f__[Mogibacteriaceae];g__s__                                  | 2.79E-03 | 3.39E+00 | 6.39E+00 |
| 2883968                        | k__Bacteria;p__Firmicutes;c__Clostridia;o__Clostridiales;f__g__s__                                                     | 2.80E-03 | 6.54E+00 | 6.57E-01 |
| 4432463                        | k__Bacteria;p__Actinobacteria;c__Coriobacteriia;o__Coriobacteriales;f__Coriobacteriaceae;g__s__                        | 2.82E-03 | 7.32E-01 | 5.97E-02 |
| 323615                         | k__Bacteria;p__Firmicutes;c__Clostridia;o__Clostridiales;f__Clostridiaceae;g__s__                                      | 2.90E-03 | 8.45E-02 | 2.34E+00 |
| 686211                         | k__Bacteria;p__Firmicutes;c__Clostridia;o__Clostridiales;f__Ruminococcaceae;g__Ruminococcus;s__flavofaciens            | 2.90E-03 | 1.01E+00 | 4.01E+00 |
| New.CleanUp.ReferenceOTU105232 | k__Bacteria;p__Firmicutes;c__Clostridia;o__Clostridiales;f__Christensenellaceae;g__s__                                 | 2.92E-03 | 5.63E-02 | 1.15E+00 |
| 297402                         | k__Bacteria;p__Bacteroidetes;c__Bacteroidia;o__Bacteroidales;f__BS11;g__s__                                            | 2.92E-03 | 4.04E+01 | 5.34E+01 |
| 316092                         | k__Bacteria;p__Bacteroidetes;c__Bacteroidia;o__Bacteroidales;f__Prevotellaceae;g__Prevotella;s__                       | 2.94E-03 | 1.55E-01 | 1.09E+00 |
| New.ReferenceOTU887            | k__Bacteria;p__Firmicutes;c__Clostridia;o__Clostridiales;f__Lachnospiraceae;g__s__                                     | 2.95E-03 | 0.00E+00 | 2.84E-01 |
| 4380450                        | k__Bacteria;p__Firmicutes;c__Clostridia;o__Clostridiales;f__Ruminococcaceae;g__Oscillospira;s__                        | 2.95E-03 | 7.04E-01 | 2.99E-02 |
| 271582                         | k__Bacteria;p__SR1;c__o__f__g__s__                                                                                     | 2.96E-03 | 0.00E+00 | 5.67E-01 |
| 302580                         | k__Bacteria;p__Verrucomicrobia;c__Verruco-5;o__WCHB1-41;f__RFP12;g__s__                                                | 2.97E-03 | 4.23E-02 | 3.43E-01 |
| 4336939                        | k__Bacteria;p__Firmicutes;c__Clostridia;o__Clostridiales;f__Ruminococcaceae;g__s__                                     | 2.98E-03 | 8.45E-02 | 5.67E-01 |
| 354924                         | k__Bacteria;p__Bacteroidetes;c__Bacteroidia;o__Bacteroidales;f__g__s__                                                 | 3.00E-03 | 7.89E-01 | 2.04E+00 |
| 190658                         | k__Bacteria;p__Firmicutes;c__Clostridia;o__Clostridiales;f__Ruminococcaceae;g__Oscillospira;s__                        | 3.00E-03 | 6.48E-01 | 4.33E-01 |
| New.ReferenceOTU820            | k__Bacteria;p__Proteobacteria;c__Deltaproteobacteria;o__Desulfovibrionales;f__Desulfovibrionaceae;g__Desulfovibrio;s__ | 3.01E-03 | 3.80E-01 | 2.42E+00 |
| 303247                         | k__Bacteria;p__Firmicutes;c__Clostridia;o__Clostridiales;f__Ruminococcaceae;g__s__                                     | 3.01E-03 | 2.82E-02 | 7.01E-01 |
| 322719                         | k__Bacteria;p__Firmicutes;c__Clostridia;o__Clostridiales;f__Ruminococcaceae;g__s__                                     | 3.01E-03 | 5.63E-02 | 4.78E-01 |
| 258447                         | k__Bacteria;p__Firmicutes;c__Clostridia;o__Clostridiales;f__g__s__                                                     | 3.02E-03 | 1.01E+00 | 3.48E+00 |
| 292380                         | k__Bacteria;p__Verrucomicrobia;c__Verruco-5;o__WCHB1-41;f__RFP12;g__s__                                                | 3.03E-03 | 8.59E-01 | 3.37E+00 |

|                                |                                                                                                              |          |          |          |
|--------------------------------|--------------------------------------------------------------------------------------------------------------|----------|----------|----------|
| 287755                         | k__Bacteria;p__Firmicutes;c__Clostridia;o__Clostridiales;f__Lachnospiraceae;g__<br>;s__                      | 3.03E-03 | 9.86E-02 | 7.91E-01 |
| 331478                         | k__Bacteria;p__Firmicutes;c__Clostridia;o__Clostridiales;f__Ruminococcaceae;g__<br>;s__                      | 3.05E-03 | 8.45E-02 | 6.72E-01 |
| 98939                          | k__Bacteria;p__Firmicutes;c__Clostridia;o__Clostridiales;f__Clostridiaceae;g__C<br>lostridium;s__            | 3.07E-03 | 2.11E-01 | 1.21E+00 |
| 785522                         | k__Bacteria;p__Firmicutes;c__Bacilli;o__Bacillales;f__Planococcaceae;g__Sporo<br>sarcina;s__                 | 3.11E-03 | 2.89E+00 | 3.73E-01 |
| 571165                         | k__Bacteria;p__Firmicutes;c__Clostridia;o__Clostridiales;f__Ruminococcaceae;g__<br>;s__                      | 3.14E-03 | 3.00E+00 | 4.54E+00 |
| 317779                         | k__Bacteria;p__Bacteroidetes;c__Bacteroidia;o__Bacteroidales;f__[Paraprevote<br>llaceae];g__CF231;s__        | 3.15E-03 | 2.00E+00 | 4.03E+00 |
| New.ReferenceOTU340            | k__Bacteria;p__Firmicutes;c__Clostridia;o__Clostridiales;f__g__s__                                           | 3.15E-03 | 1.13E-01 | 5.97E-01 |
| New.ReferenceOTU938            | k__Bacteria;p__Firmicutes;c__Clostridia;o__Clostridiales;f__Christensenellaceae<br>;g__s__                   | 3.18E-03 | 1.41E-02 | 6.57E-01 |
| 204705                         | k__Bacteria;p__Firmicutes;c__Clostridia;o__Clostridiales;f__Ruminococcaceae;g__<br>;s__                      | 3.18E-03 | 1.41E-02 | 1.00E+00 |
| 191434                         | k__Bacteria;p__Firmicutes;c__Clostridia;o__Clostridiales;f__Lachnospiraceae;g__<br>Dorea;s__                 | 3.20E-03 | 4.51E-01 | 2.99E-02 |
| 4396297                        | k__Bacteria;p__Firmicutes;c__Clostridia;o__Clostridiales;f__Lachnospiraceae;g__<br>;s__                      | 3.20E-03 | 7.04E-01 | 4.48E-02 |
| New.ReferenceOTU775            | k__Bacteria;p__Firmicutes;c__Clostridia;o__Clostridiales;f__g__s__                                           | 3.20E-03 | 1.13E-01 | 6.57E-01 |
| 749798                         | k__Bacteria;p__Firmicutes;c__Clostridia;o__Clostridiales;f__Lachnospiraceae;g__<br>;s__                      | 3.20E-03 | 4.08E-01 | 1.21E+00 |
| New.ReferenceOTU116            | k__Bacteria;p__Firmicutes;c__Clostridia;o__Clostridiales;f__Ruminococcaceae;g__<br>;s__                      | 3.22E-03 | 9.58E-01 | 2.07E+00 |
| 306020                         | k__Bacteria;p__Firmicutes;c__Clostridia;o__Clostridiales;f__Ruminococcaceae;g__<br>;s__                      | 3.23E-03 | 1.27E-01 | 5.97E-01 |
| 294845                         | k__Bacteria;p__Verrucomicrobia;c__Verruco-5;o__WCHB1-41;f__RFP12;g__s__                                      | 3.26E-03 | 2.39E-01 | 1.19E+00 |
| New.CleanUp.ReferenceOTU32628  | k__Bacteria;p__Firmicutes;c__Bacilli;o__Lactobacillales;f__Lactobacillaceae;g__<br>Lactobacillus;s__         | 3.30E-03 | 8.45E-01 | 1.34E-01 |
| 289958                         | k__Bacteria;p__Firmicutes;c__Clostridia;o__Clostridiales;f__Ruminococcaceae;g__<br>;s__                      | 3.32E-03 | 2.85E+00 | 5.40E+00 |
| 294642                         | k__Bacteria;p__Bacteroidetes;c__Bacteroidia;o__Bacteroidales;f__BS11;g__s__                                  | 3.32E-03 | 1.41E-02 | 5.37E-01 |
| New.CleanUp.ReferenceOTU57539  | k__Bacteria;p__Firmicutes;c__Clostridia;o__Clostridiales;f__Ruminococcaceae;g__<br>;s__                      | 3.32E-03 | 1.41E-02 | 3.43E-01 |
| 292175                         | k__Bacteria;p__Firmicutes;c__Bacilli;o__Lactobacillales;f__Lactobacillaceae;g__<br>Lactobacillus;s__         | 3.34E-03 | 2.25E+00 | 6.57E-01 |
| New.CleanUp.ReferenceOTU149931 | k__Bacteria;p__Bacteroidetes;c__Bacteroidia;o__Bacteroidales;f__[Paraprevote<br>llaceae];g__CF231;s__        | 3.38E-03 | 7.04E-02 | 6.57E-01 |
| 289752                         | k__Bacteria;p__Firmicutes;c__Clostridia;o__Clostridiales;f__Veillonellaceae;g__<br>Phascolarctobacterium;s__ | 3.39E-03 | 2.21E+00 | 6.19E+00 |
| 162820                         | k__Bacteria;p__Firmicutes;c__Clostridia;o__Clostridiales;f__Lachnospiraceae;g__<br>;s__                      | 3.41E-03 | 2.11E-01 | 1.12E+00 |
| New.ReferenceOTU498            | k__Bacteria;p__Firmicutes;c__Clostridia;o__Clostridiales;f__Ruminococcaceae;g__<br>;s__                      | 3.45E-03 | 4.37E-01 | 7.76E-01 |
| 180659                         | k__Bacteria;p__Firmicutes;c__Clostridia;o__Clostridiales;f__Ruminococcaceae;g__<br>Oscillospira;s__          | 3.48E-03 | 1.42E+00 | 5.52E-01 |
| 357046                         | k__Bacteria;p__Bacteroidetes;c__Bacteroidia;o__Bacteroidales;f__Rikenellacea<br>e;g__s__                     | 3.48E-03 | 4.85E+00 | 6.27E-01 |
| 199286                         | k__Bacteria;p__Firmicutes;c__Clostridia;o__Clostridiales;f__Ruminococcaceae;g__<br>;s__                      | 3.49E-03 | 1.87E+00 | 2.39E-01 |
| New.CleanUp.ReferenceOTU148523 | k__Bacteria;p__Tenericutes;c__Mollicutes;o__RF39;f__g__s__                                                   | 3.51E-03 | 1.38E+00 | 2.24E-01 |
| New.ReferenceOTU992            | k__Bacteria;p__Firmicutes;c__Clostridia;o__Clostridiales;f__[Mogibacteriaceae];<br>g__s__                    | 3.52E-03 | 1.27E-01 | 6.12E-01 |
| 4397402                        | k__Bacteria;p__Firmicutes;c__Bacilli;o__Lactobacillales;f__Lactobacillaceae;g__<br>Lactobacillus;s__         | 3.54E-03 | 1.41E+01 | 6.22E+00 |
| 300374                         | k__Bacteria;p__Firmicutes;c__Clostridia;o__Clostridiales;f__Ruminococcaceae;g__<br>Oscillospira;s__          | 3.58E-03 | 3.38E-01 | 5.97E-02 |

|                                |                                                                                                      |          |          |          |
|--------------------------------|------------------------------------------------------------------------------------------------------|----------|----------|----------|
| 4296701                        | k_Bacteria;p_Firmicutes;c_Clostridia;o_Clostridiales;f_Ruminococcaceae;g_Oscillospira;s__            | 3.60E-03 | 1.17E+00 | 1.34E-01 |
| 178809                         | k_Bacteria;p_Firmicutes;c_Clostridia;o_Clostridiales;f_Lachnospiraceae                               | 3.62E-03 | 1.11E+00 | 1.49E-01 |
| New.CleanUp.ReferenceOTU142481 | k_Bacteria;p_Firmicutes;c_Clostridia                                                                 | 3.66E-03 | 2.11E-01 | 0.00E+00 |
| 268506                         | k_Bacteria;p_Firmicutes;c_Clostridia;o_Clostridiales;f_Veillonellaceae;g_Succiniclasticum;s__        | 3.67E-03 | 1.10E+00 | 0.00E+00 |
| 177593                         | k_Bacteria;p_Firmicutes;c_Clostridia;o_Clostridiales;f_Ruminococcaceae;g_Ruminococcus;s__            | 3.67E-03 | 2.96E-01 | 0.00E+00 |
| New.CleanUp.ReferenceOTU7122   | k_Bacteria;p_Firmicutes;c_Clostridia;o_Clostridiales;f_Lachnospiraceae;g__;s__                       | 3.68E-03 | 2.54E-01 | 0.00E+00 |
| New.CleanUp.ReferenceOTU101731 | k_Bacteria;p_Firmicutes;c_Clostridia;o_Clostridiales;f__;g__;s__                                     | 3.69E-03 | 2.82E-01 | 0.00E+00 |
| New.CleanUp.ReferenceOTU107694 | k_Bacteria;p_Firmicutes;c_Clostridia;o_Clostridiales;f_Lachnospiraceae                               | 3.69E-03 | 3.66E-01 | 0.00E+00 |
| 4459184                        | k_Bacteria;p_Firmicutes;c_Clostridia;o_Clostridiales;f__;g__;s__                                     | 3.69E-03 | 7.18E-01 | 0.00E+00 |
| New.CleanUp.ReferenceOTU108600 | k_Bacteria;p_Firmicutes;c_Clostridia;o_Clostridiales;f_Lachnospiraceae;g__;s__                       | 3.69E-03 | 4.37E-01 | 0.00E+00 |
| 182033                         | k_Bacteria;p_Firmicutes;c_Clostridia;o_Clostridiales;f_Ruminococcaceae;g_Oscillospira;s__            | 3.69E-03 | 2.96E-01 | 0.00E+00 |
| New.ReferenceOTU668            | k_Bacteria;p_Bacteroidetes;c_Bacteroidia;o_Bacteroidales;f_Bacteroidaceae;g_Bacteroides;s__          | 3.69E-03 | 3.38E-01 | 0.00E+00 |
| New.CleanUp.ReferenceOTU101301 | k_Bacteria;p_Firmicutes;c_Clostridia;o_Clostridiales;f__;g__;s__                                     | 3.69E-03 | 3.52E-01 | 0.00E+00 |
| 184984                         | k_Bacteria;p_Firmicutes;c_Clostridia;o_Clostridiales;f_Lachnospiraceae;g__;s__                       | 3.69E-03 | 5.21E-01 | 0.00E+00 |
| 110562                         | k_Bacteria;p_Firmicutes;c_Clostridia;o_Clostridiales;f_Ruminococcaceae;g_Ruminococcus;s__            | 3.70E-03 | 1.21E+00 | 0.00E+00 |
| 204629                         | k_Bacteria;p_Firmicutes;c_Clostridia;o_Clostridiales;f_Ruminococcaceae;g__;s__                       | 3.70E-03 | 5.63E-02 | 4.63E-01 |
| 334395                         | k_Bacteria;p_Firmicutes;c_Clostridia;o_Clostridiales;f__;g__;s__                                     | 3.74E-03 | 2.27E+00 | 3.58E-01 |
| 3474081                        | k_Bacteria;p_Bacteroidetes;c_Bacteroidia;o_Bacteroidales;f_Bacteroidaceae;g_Bacteroides;s_fragilis   | 3.74E-03 | 5.39E+00 | 1.81E+00 |
| 304469                         | k_Bacteria;p_Firmicutes;c_Clostridia;o_Clostridiales;f__;g__;s__                                     | 3.78E-03 | 1.99E+00 | 2.09E+00 |
| 302427                         | k_Bacteria;p_Firmicutes;c_Clostridia;o_Clostridiales;f_Ruminococcaceae;g__;s__                       | 3.78E-03 | 7.04E-02 | 1.28E+00 |
| 244120                         | k_Bacteria;p_Firmicutes;c_Clostridia;o_Clostridiales;f_Ruminococcaceae;g__;s__                       | 3.79E-03 | 9.86E-02 | 7.61E-01 |
| 1135946                        | k_Bacteria;p_Proteobacteria;c_Epsilonproteobacteria;o_Campylobacterales;f_Helicobacteraceae;g__;s__  | 3.81E-03 | 2.49E+00 | 6.39E+00 |
| 278650                         | k_Bacteria;p_Cyanobacteria;c_4C0d-2;o_YS2;f__;g__;s__                                                | 3.85E-03 | 5.63E-02 | 4.33E-01 |
| New.ReferenceOTU109            | k_Bacteria;p_Tenericutes;c_RF3;o_ML615J-28;f__;g__;s__                                               | 3.87E-03 | 4.76E+00 | 2.03E+00 |
| 300390                         | k_Bacteria;p_Firmicutes;c_Clostridia;o_Clostridiales;f__;g__;s__                                     | 3.92E-03 | 9.86E-01 | 3.01E+00 |
| New.ReferenceOTU252            | k_Bacteria;p_Actinobacteria;c_Coriobacteriia;o_Coriobacteriales;f_Coriobacteriaceae;g__;s__          | 3.97E-03 | 7.61E-01 | 3.46E+00 |
| 362958                         | k_Bacteria;p_Firmicutes;c_Clostridia;o_Clostridiales;f_Lachnospiraceae;g_Blautia;s__                 | 4.07E-03 | 7.89E-01 | 1.34E-01 |
| 95256                          | k_Bacteria;p_Firmicutes;c_Clostridia;o_Clostridiales;f_Ruminococcaceae;g_Ruminococcus;s_flavofaciens | 4.08E-03 | 4.23E-02 | 4.78E-01 |
| New.ReferenceOTU440            | k_Bacteria;p_Spirochaetes;c_Spirochaetes;o_Spirochaetales;f_Spirochaetaceae;g_Treponema;s__          | 4.13E-03 | 1.13E-01 | 5.37E-01 |
| 4446739                        | k_Bacteria;p_Firmicutes;c_Clostridia;o_Clostridiales;f_Ruminococcaceae;g__;s__                       | 4.13E-03 | 4.23E-02 | 2.99E-01 |
| 301555                         | k_Bacteria;p_Actinobacteria;c_Coriobacteriia;o_Coriobacteriales;f_Coriobacteriaceae;g__;s__          | 4.14E-03 | 8.31E-01 | 5.97E+00 |
| New.CleanUp.ReferenceOTU137341 | k_Bacteria;p_Firmicutes;c_Clostridia;o_Clostridiales;f_Lachnospiraceae;g_Blautia;s__                 | 4.14E-03 | 2.82E-02 | 2.69E-01 |

|                                |                                                                                                               |          |          |          |
|--------------------------------|---------------------------------------------------------------------------------------------------------------|----------|----------|----------|
| 593868                         | k__Bacteria;p__Tenericutes;c__Mollicutes;o__RF39;f__g__s__                                                    | 4.15E-03 | 1.46E+00 | 2.24E-01 |
| New.CleanUp.ReferenceOTU96505  | k__Bacteria;p__Bacteroidetes;c__Bacteroidia;o__Bacteroidales;f__[Paraprevotellaceae];g__YRC22;s__             | 4.17E-03 | 2.82E-01 | 5.97E-01 |
| 4122608                        | k__Bacteria;p__Firmicutes;c__Clostridia;o__Clostridiales;f__Ruminococcaceae;g__s__                            | 4.17E-03 | 8.54E+00 | 1.72E+00 |
| 298788                         | k__Bacteria;p__Firmicutes;c__Clostridia;o__Clostridiales;f__Lachnospiraceae;g__s__                            | 4.24E-03 | 1.56E+00 | 1.79E-01 |
| 327282                         | k__Bacteria;p__Firmicutes;c__Clostridia;o__Clostridiales;f__g__s__                                            | 4.24E-03 | 9.30E-01 | 1.04E-01 |
| 4398588                        | k__Bacteria;p__Firmicutes;c__Clostridia;o__Clostridiales;f__Ruminococcaceae;g__s__                            | 4.26E-03 | 4.93E-01 | 2.99E-02 |
| 3090117                        | k__Bacteria;p__Bacteroidetes;c__Bacteroidia;o__Bacteroidales;f__[Barnesiellaceae];g__s__                      | 4.27E-03 | 1.66E+00 | 1.49E-02 |
| New.ReferenceOTU301            | k__Bacteria;p__Bacteroidetes;c__Bacteroidia;o__Bacteroidales;f__g__s__                                        | 4.31E-03 | 7.04E-01 | 1.15E+00 |
| 151006                         | k__Bacteria;p__Firmicutes;c__Clostridia;o__Clostridiales;f__Lachnospiraceae;g__Anaerostipes;s__               | 4.32E-03 | 5.63E-01 | 1.49E-02 |
| New.ReferenceOTU911            | k__Bacteria;p__Bacteroidetes;c__Bacteroidia;o__Bacteroidales;f__[Paraprevotellaceae];g__s__                   | 4.33E-03 | 5.35E-01 | 1.57E+00 |
| 347115                         | k__Bacteria;p__Firmicutes;c__Clostridia;o__Clostridiales;f__Lachnospiraceae;g__Blautia;s__                    | 4.36E-03 | 1.97E-01 | 6.12E-01 |
| New.CleanUp.ReferenceOTU19255  | k__Bacteria;p__Firmicutes;c__Clostridia;o__Clostridiales;f__Lachnospiraceae;g__Dorea;s__                      | 4.40E-03 | 6.76E-01 | 1.19E-01 |
| 276783                         | k__Bacteria;p__Firmicutes;c__Clostridia;o__Clostridiales;f__Lachnospiraceae;g__s__                            | 4.40E-03 | 7.46E-01 | 1.09E+00 |
| New.CleanUp.ReferenceOTU31194  | k__Bacteria;p__Spirochaetes;c__Spirochaetes;o__Spirochaetales;f__Spirochaetaceae;g__Treponema;s__             | 4.41E-03 | 2.82E-01 | 9.25E-01 |
| 273657                         | k__Bacteria;p__Firmicutes;c__Clostridia;o__Clostridiales;f__Peptococcaceae;g__rc4-4;s__                       | 4.43E-03 | 1.20E+00 | 2.39E-01 |
| New.ReferenceOTU784            | k__Bacteria;p__Proteobacteria;c__Alphaproteobacteria;o__RF32;f__g__s__                                        | 4.44E-03 | 3.73E+00 | 4.63E-01 |
| 301447                         | k__Bacteria;p__Actinobacteria;c__Coriobacteriia;o__Coriobacteriales;f__Coriobacteriaceae;g__Adlercreutzia;s__ | 4.45E-03 | 3.76E+00 | 6.48E+00 |
| 177758                         | k__Bacteria;p__Firmicutes;c__Clostridia;o__Clostridiales;f__Lachnospiraceae;g__Dorea;s__                      | 4.45E-03 | 5.21E-01 | 1.49E-02 |
| 288349                         | k__Bacteria;p__Firmicutes;c__Clostridia;o__Clostridiales;f__Ruminococcaceae;g__s__                            | 4.52E-03 | 5.77E-01 | 2.06E+00 |
| New.CleanUp.ReferenceOTU63608  | k__Bacteria;p__Actinobacteria;c__Coriobacteriia;o__Coriobacteriales;f__Coriobacteriaceae;g__s__               | 4.64E-03 | 2.54E-01 | 8.36E-01 |
| New.CleanUp.ReferenceOTU161788 | k__Bacteria;p__Bacteroidetes;c__Bacteroidia;o__Bacteroidales;f__g__s__                                        | 4.66E-03 | 2.82E-01 | 9.10E-01 |
| New.ReferenceOTU869            | k__Bacteria;p__Bacteroidetes;c__Bacteroidia;o__Bacteroidales;f__g__s__                                        | 4.70E-03 | 2.54E-01 | 5.37E-01 |
| 355877                         | k__Bacteria;p__Firmicutes;c__Clostridia;o__Clostridiales;f__Lachnospiraceae;g__s__                            | 4.70E-03 | 2.96E-01 | 1.16E+00 |
| New.CleanUp.ReferenceOTU38465  | k__Bacteria;p__Firmicutes;c__Clostridia;o__Clostridiales;f__Lachnospiraceae;g__Coprococcus;s__                | 4.74E-03 | 7.04E-02 | 5.67E-01 |
| New.ReferenceOTU261            | k__Bacteria;p__Firmicutes;c__Clostridia;o__Clostridiales;f__Lachnospiraceae;g__s__                            | 4.74E-03 | 7.04E-01 | 1.04E+00 |
| 77458                          | k__Bacteria;p__Firmicutes;c__Clostridia;o__Clostridiales;f__Lachnospiraceae                                   | 4.77E-03 | 6.34E-01 | 4.48E-02 |
| New.ReferenceOTU776            | k__Bacteria;p__Actinobacteria;c__Coriobacteriia;o__Coriobacteriales;f__Coriobacteriaceae;g__Adlercreutzia;s__ | 4.77E-03 | 1.82E+00 | 3.39E+00 |
| 4405104                        | k__Bacteria;p__Firmicutes;c__Clostridia;o__Clostridiales;f__Lachnospiraceae;g__Coprococcus;s__                | 4.80E-03 | 1.10E+00 | 2.39E-01 |
| 296731                         | k__Bacteria;p__Firmicutes;c__Clostridia;o__Clostridiales;f__Ruminococcaceae;g__s__                            | 4.84E-03 | 1.04E+02 | 1.40E+02 |
| 820272                         | k__Bacteria;p__Firmicutes;c__Clostridia;o__Clostridiales;f__Lachnospiraceae;g__s__                            | 4.90E-03 | 4.65E-01 | 2.09E+00 |
| New.ReferenceOTU740            | k__Bacteria;p__Firmicutes;c__Clostridia;o__Clostridiales;f__Ruminococcaceae;g__Ruminococcus;s__               | 4.91E-03 | 5.92E-01 | 2.09E+00 |
| 316888                         | k__Bacteria;p__Firmicutes;c__Bacilli;o__Lactobacillales;f__Carnobacteriaceae;g__Desemzia;s__                  | 5.04E-03 | 2.89E+00 | 2.24E-01 |

|                                |                                                                                                       |          |          |          |
|--------------------------------|-------------------------------------------------------------------------------------------------------|----------|----------|----------|
| 4370941                        | k__Bacteria;p__Firmicutes;c__Clostridia;o__Clostridiales;f__Ruminococcaceae;g__Oscillospira;s__       | 5.04E-03 | 8.59E-01 | 2.24E-01 |
| 319680                         | k__Bacteria;p__Firmicutes;c__Clostridia;o__Clostridiales;f__Lachnospiraceae;g__s__                    | 5.05E-03 | 1.17E+00 | 1.34E-01 |
| 1146865                        | k__Bacteria;p__Firmicutes;c__Bacilli;o__Lactobacillales;f__Streptococcaceae;g__Streptococcus;s__      | 5.10E-03 | 1.94E+00 | 6.87E-01 |
| New.ReferenceOTU507            | k__Bacteria;p__Firmicutes;c__Clostridia;o__Clostridiales;f__[Mogibacteriaceae];g__s__                 | 5.12E-03 | 9.01E-01 | 3.33E+00 |
| New.CleanUp.ReferenceOTU57010  | k__Bacteria;p__Firmicutes;c__Clostridia;o__Clostridiales;f__;g__;s__                                  | 5.13E-03 | 4.23E-02 | 3.58E-01 |
| New.CleanUp.ReferenceOTU118948 | k__Bacteria;p__Firmicutes;c__Clostridia;o__Clostridiales;f__Ruminococcaceae                           | 5.19E-03 | 2.25E-01 | 5.97E-01 |
| 271320                         | k__Bacteria;p__Firmicutes;c__Clostridia;o__Clostridiales;f__[Mogibacteriaceae];g__s__                 | 5.19E-03 | 4.37E-01 | 1.79E+00 |
| 4345285                        | k__Bacteria;p__Firmicutes;c__Bacilli;o__Bacillales;f__Staphylococcaceae;g__Staphylococcus;s__         | 5.22E-03 | 2.75E+00 | 7.46E-02 |
| New.CleanUp.ReferenceOTU42518  | k__Bacteria;p__Bacteroidetes;c__Bacteroidia;o__Bacteroidales;f__[Paraprevotellaceae];g__YRC22;s__     | 5.24E-03 | 0.00E+00 | 7.01E-01 |
| 4326866                        | k__Bacteria;p__Firmicutes;c__Clostridia;o__Clostridiales;f__Ruminococcaceae;g__s__                    | 5.24E-03 | 3.04E+00 | 4.61E+00 |
| 4319005                        | k__Bacteria;p__Firmicutes;c__Clostridia;o__Clostridiales;f__);g__);s__                                | 5.24E-03 | 0.00E+00 | 9.40E-01 |
| New.CleanUp.ReferenceOTU52049  | k__Bacteria;p__Bacteroidetes;c__Bacteroidia;o__Bacteroidales;f__);g__);s__                            | 5.24E-03 | 0.00E+00 | 5.52E-01 |
| 339673                         | k__Bacteria;p__Firmicutes;c__Clostridia;o__Clostridiales;f__Christensenellaceae;g__s__                | 5.28E-03 | 9.86E-02 | 1.04E+00 |
| 300458                         | k__Bacteria;p__Firmicutes;c__Clostridia;o__Clostridiales;f__Ruminococcaceae;g__s__                    | 5.28E-03 | 2.82E-01 | 8.06E-01 |
| 1995182                        | k__Bacteria;p__Firmicutes;c__Bacilli;o__Lactobacillales;f__Lactobacillaceae;g__Lactobacillus;s__      | 5.41E-03 | 2.36E+01 | 1.15E+01 |
| 193969                         | k__Bacteria;p__Firmicutes;c__Clostridia;o__Clostridiales;f__);g__);s__                                | 5.43E-03 | 1.46E+00 | 1.49E-01 |
| New.ReferenceOTU837            | k__Bacteria;p__Firmicutes;c__Clostridia;o__Clostridiales;f__Ruminococcaceae;g__Ruminococcus;s__       | 5.49E-03 | 2.82E-02 | 6.72E-01 |
| 4372528                        | k__Bacteria;p__Firmicutes;c__Clostridia;o__Clostridiales;f__Clostridiaceae;g__SMB53;s__               | 5.49E-03 | 7.89E-01 | 8.96E-02 |
| 292285                         | k__Bacteria;p__Firmicutes;c__Clostridia;o__Clostridiales;f__);g__);s__                                | 5.53E-03 | 1.69E-01 | 1.36E+00 |
| 290415                         | k__Bacteria;p__Firmicutes;c__Clostridia;o__Clostridiales;f__Ruminococcaceae;g__s__                    | 5.56E-03 | 1.59E+00 | 2.82E+00 |
| 290086                         | k__Bacteria;p__Firmicutes;c__Clostridia;o__Clostridiales;f__);g__);s__                                | 5.61E-03 | 2.82E-02 | 4.03E-01 |
| 164216                         | k__Bacteria;p__Firmicutes;c__Clostridia;o__Clostridiales;f__Lachnospiraceae;g__s__                    | 5.64E-03 | 1.69E-01 | 5.82E-01 |
| 183147                         | k__Bacteria;p__Firmicutes;c__Clostridia;o__Clostridiales;f__Lachnospiraceae;g__s__                    | 5.70E-03 | 1.73E+00 | 3.43E-01 |
| 299592                         | k__Bacteria;p__Firmicutes;c__Clostridia;o__Clostridiales;f__Lachnospiraceae;g__Blautia;s__            | 5.72E-03 | 9.86E-02 | 6.57E-01 |
| New.ReferenceOTU721            | k__Bacteria;p__Firmicutes;c__Clostridia;o__Clostridiales;f__[Mogibacteriaceae];g__s__                 | 5.75E-03 | 3.24E-01 | 9.10E-01 |
| 299488                         | k__Bacteria;p__Bacteroidetes;c__Bacteroidia;o__Bacteroidales;f__);g__);s__                            | 5.76E-03 | 1.89E+00 | 2.94E+00 |
| 1908049                        | k__Bacteria;p__Firmicutes;c__Clostridia;o__Clostridiales;f__Ruminococcaceae;g__s__                    | 5.83E-03 | 1.38E+01 | 2.43E+00 |
| New.CleanUp.ReferenceOTU161145 | k__Bacteria;p__Firmicutes;c__Clostridia;o__Clostridiales;f__[Mogibacteriaceae];g__s__                 | 5.90E-03 | 1.41E-02 | 6.27E-01 |
| 297730                         | k__Bacteria;p__Firmicutes;c__Clostridia;o__Clostridiales;f__Christensenellaceae;g__s__                | 5.95E-03 | 8.45E-02 | 4.33E-01 |
| New.CleanUp.ReferenceOTU22966  | k__Bacteria;p__Firmicutes;c__Clostridia;o__Clostridiales;f__Lachnospiraceae;g__Blautia;s__producta    | 5.96E-03 | 1.41E-02 | 2.84E-01 |
| 4359317                        | k__Bacteria;p__Firmicutes;c__Bacilli;o__Lactobacillales;f__Streptococcaceae;g__Streptococcus;s__minor | 6.02E-03 | 5.38E+00 | 1.59E+01 |
| New.ReferenceOTU756            | k__Bacteria;p__Firmicutes;c__Clostridia;o__Clostridiales;f__Lachnospiraceae;g__s__                    | 6.02E-03 | 6.76E-01 | 2.16E+00 |

|                                |                                                                                            |          |          |          |
|--------------------------------|--------------------------------------------------------------------------------------------|----------|----------|----------|
| 105099                         | k_Bacteria;p_Firmicutes;c_Clostridia;o_Clostridiales;f_Lachnospiraceae;g_ ;s_              | 6.06E-03 | 2.82E-01 | 1.42E+00 |
| 110462                         | k_Bacteria;p_Firmicutes;c_Clostridia;o_Clostridiales;f_Christensenellaceae ;g_ ;s_         | 6.08E-03 | 1.14E+00 | 2.84E-01 |
| 789561                         | k_Bacteria;p_Firmicutes;c_Clostridia;o_Clostridiales;f_ ;g_ ;s_                            | 6.09E-03 | 3.66E-01 | 5.97E-02 |
| New.CleanUp.ReferenceOTU63512  | k_Bacteria;p_Firmicutes;c_Clostridia;o_Clostridiales;f_ ;g_ ;s_                            | 6.09E-03 | 1.41E-02 | 2.54E-01 |
| New.CleanUp.ReferenceOTU162252 | k_Bacteria;p_Firmicutes;c_Clostridia;o_Clostridiales;f_Ruminococcaceae;g_ ;s_              | 6.15E-03 | 1.41E-02 | 2.99E-01 |
| New.CleanUp.ReferenceOTU54737  | k_Bacteria;p_Firmicutes;c_Bacilli;o_Lactobacillales;f_Lactobacillaceae;g_Lactobacillus;s_  | 6.18E-03 | 8.45E-01 | 1.49E-01 |
| 2532173                        | k_Bacteria;p_Firmicutes;c_Clostridia;o_Clostridiales;f_ ;g_ ;s_                            | 6.18E-03 | 1.45E+00 | 0.00E+00 |
| New.CleanUp.ReferenceOTU52958  | k_Bacteria;p_Firmicutes;c_Clostridia;o_Clostridiales;f_ ;g_ ;s_                            | 6.18E-03 | 1.97E-01 | 0.00E+00 |
| 289348                         | k_Bacteria;p_Firmicutes;c_Clostridia;o_Clostridiales;f_Lachnospiraceae;g_ Coprococcus;s_   | 6.18E-03 | 3.21E+00 | 6.87E-01 |
| 573551                         | k_Bacteria;p_Firmicutes;c_Clostridia;o_Clostridiales;f_ ;g_ ;s_                            | 6.18E-03 | 1.41E-01 | 7.61E-01 |
| 329761                         | k_Bacteria;p_Firmicutes;c_Clostridia;o_Clostridiales;f_ ;g_ ;s_                            | 6.18E-03 | 2.11E-01 | 0.00E+00 |
| 4463030                        | k_Bacteria;p_Firmicutes;c_Clostridia;o_Clostridiales;f_Lachnospiraceae                     | 6.18E-03 | 2.39E-01 | 0.00E+00 |
| New.CleanUp.ReferenceOTU100792 | k_Bacteria;p_Firmicutes;c_Clostridia;o_Clostridiales;f_ ;g_ ;s_                            | 6.18E-03 | 2.11E-01 | 0.00E+00 |
| New.ReferenceOTU372            | k_Bacteria;p_Firmicutes;c_Clostridia;o_Clostridiales;f_Lachnospiraceae;g_ ;s_              | 6.19E-03 | 3.10E-01 | 0.00E+00 |
| New.CleanUp.ReferenceOTU144625 | k_Bacteria;p_Firmicutes;c_Clostridia;o_Clostridiales;f_Ruminococcaceae;g_ ;s_              | 6.19E-03 | 2.96E-01 | 0.00E+00 |
| 293097                         | k_Bacteria;p_Firmicutes;c_Clostridia;o_Clostridiales;f_Lachnospiraceae                     | 6.19E-03 | 4.51E-01 | 0.00E+00 |
| New.CleanUp.ReferenceOTU158189 | k_Bacteria;p_Firmicutes;c_Clostridia;o_Clostridiales;f_Lachnospiraceae;g_ ;s_              | 6.20E-03 | 2.68E-01 | 0.00E+00 |
| 177153                         | k_Bacteria;p_Firmicutes;c_Clostridia;o_Clostridiales;f_ ;g_ ;s_                            | 6.21E-03 | 3.10E-01 | 0.00E+00 |
| 182255                         | k_Bacteria;p_Bacteroidetes;c_Bacteroidia;o_Bacteroidales;f_Bacteroidaceae;g_Bacteroides;s_ | 6.22E-03 | 4.79E-01 | 8.96E-02 |
| 153291                         | k_Bacteria;p_Firmicutes;c_Clostridia;o_Clostridiales;f_ ;g_ ;s_                            | 6.28E-03 | 5.66E+00 | 1.37E+00 |
| 306198                         | k_Bacteria;p_Firmicutes;c_Clostridia;o_Clostridiales;f_ ;g_ ;s_                            | 6.30E-03 | 7.04E-02 | 1.25E+00 |
| 290679                         | k_Bacteria;p_Firmicutes;c_Clostridia;o_Clostridiales;f_ ;g_ ;s_                            | 6.35E-03 | 1.69E-01 | 6.87E-01 |
| 300658                         | k_Bacteria;p_Firmicutes;c_Bacilli;o_Lactobacillales;f_Streptococcaceae;g_Streptococcus;s_  | 6.42E-03 | 1.27E+00 | 1.94E-01 |
| New.ReferenceOTU523            | k_Bacteria;p_Bacteroidetes;c_Bacteroidia;o_Bacteroidales;f_Prevotellaceae;g_Prevotella;s_  | 6.43E-03 | 3.10E-01 | 1.07E+00 |
| 3729748                        | k_Bacteria;p_Firmicutes;c_Clostridia;o_Clostridiales;f_Peptococcaceae;g_Peptococcus;s_     | 6.53E-03 | 1.27E-01 | 9.25E-01 |
| 110192                         | k_Bacteria;p_Firmicutes;c_Clostridia;o_Clostridiales;f_Ruminococcaceae;g_Oscillospira;s_   | 6.53E-03 | 9.30E-01 | 2.54E-01 |
| 293473                         | k_Bacteria;p_Firmicutes;c_Clostridia;o_Clostridiales;f_Ruminococcaceae;g_ ;s_              | 6.53E-03 | 1.32E+00 | 9.40E-01 |
| 74480                          | k_Bacteria;p_Firmicutes;c_Clostridia;o_Clostridiales;f_Ruminococcaceae;g_ ;s_              | 6.55E-03 | 6.48E-01 | 4.48E-02 |
| 4417708                        | k_Bacteria;p_Firmicutes;c_Clostridia;o_Clostridiales;f_ ;g_ ;s_                            | 6.55E-03 | 1.41E+00 | 1.94E-01 |
| 190961                         | k_Bacteria;p_Firmicutes;c_Clostridia;o_Clostridiales;f_Lachnospiraceae                     | 6.67E-03 | 1.29E+01 | 3.33E+00 |
| 4381548                        | k_Bacteria;p_Firmicutes;c_Clostridia;o_Clostridiales;f_Ruminococcaceae;g_ ;s_              | 6.69E-03 | 1.10E+00 | 5.85E+00 |
| 290607                         | k_Bacteria;p_Firmicutes;c_Clostridia;o_Clostridiales;f_Lachnospiraceae;g_ ;s_              | 6.70E-03 | 2.54E-01 | 4.52E+00 |

|                                |                                                                                                                     |          |          |          |
|--------------------------------|---------------------------------------------------------------------------------------------------------------------|----------|----------|----------|
| New.CleanUp.ReferenceOTU119821 | k__Bacteria;p__Firmicutes;c__Clostridia;o__Clostridiales;f__Ruminococcaceae;g__s__                                  | 6.80E-03 | 2.82E-02 | 3.58E-01 |
| 295417                         | k__Bacteria;p__Firmicutes;c__Clostridia;o__Clostridiales;f__Lachnospiraceae;g__s__                                  | 6.81E-03 | 7.75E-01 | 1.48E+00 |
| New.ReferenceOTU660            | k__Bacteria;p__Firmicutes;c__Clostridia;o__Clostridiales;f__Eubacteriaceae;g__Pseudoramibacter_Eubacterium;s__      | 6.83E-03 | 9.72E-01 | 2.54E+00 |
| New.CleanUp.ReferenceOTU20758  | k__Bacteria;p__Spirochaetes;c__Spirochaetes;o__Spirochaetales;f__Spirochaetaceae;g__Treponema;s__                   | 6.87E-03 | 2.82E-02 | 4.63E-01 |
| New.CleanUp.ReferenceOTU76163  | k__Bacteria;p__Firmicutes;c__Clostridia;o__Clostridiales;f__Lachnospiraceae;g__s__                                  | 6.87E-03 | 2.82E-02 | 3.58E-01 |
| 191251                         | k__Bacteria;p__Bacteroidetes;c__Bacteroidia;o__Bacteroidales;f__Porphyromonadaceae;g__Parabacteroides;s__distasonis | 6.88E-03 | 9.44E-01 | 1.34E-01 |
| 574551                         | k__Bacteria;p__Firmicutes;c__Clostridia;o__Clostridiales;f__Clostridiaceae;g__Clostridium;s__                       | 6.89E-03 | 8.17E-01 | 7.46E-02 |
| 325340                         | k__Bacteria;p__Bacteroidetes;c__Bacteroidia;o__Bacteroidales;f__[Paraprevotellaceae];g__YRC22;s__                   | 6.91E-03 | 1.13E-01 | 8.21E-01 |
| New.CleanUp.ReferenceOTU28191  | k__Bacteria;p__Firmicutes;c__Clostridia;o__Clostridiales;f__g__s__                                                  | 6.92E-03 | 3.80E-01 | 7.46E-02 |
| New.ReferenceOTU150            | k__Bacteria;p__Firmicutes;c__Clostridia;o__Clostridiales;f__Lachnospiraceae;g__s__                                  | 6.92E-03 | 1.13E-01 | 5.22E-01 |
| New.CleanUp.ReferenceOTU23848  | k__Bacteria;p__Firmicutes;c__Clostridia;o__Clostridiales;f__Ruminococcaceae;g__Oscillospira;s__                     | 6.96E-03 | 7.18E-01 | 1.64E-01 |
| 363017                         | k__Bacteria;p__Firmicutes;c__Clostridia;o__Clostridiales;f__Ruminococcaceae;g__s__                                  | 7.02E-03 | 2.82E-02 | 3.28E-01 |
| New.CleanUp.ReferenceOTU122624 | k__Bacteria;p__Firmicutes;c__Clostridia;o__Clostridiales                                                            | 7.03E-03 | 2.82E-02 | 3.13E-01 |
| 509709                         | k__Bacteria;p__Firmicutes;c__Clostridia;o__Clostridiales;f__Lachnospiraceae;g__s__                                  | 7.05E-03 | 6.83E+00 | 2.67E+00 |
| New.ReferenceOTU321            | k__Bacteria;p__Bacteroidetes;c__Bacteroidia;o__Bacteroidales;f__g__s__                                              | 7.17E-03 | 1.13E-01 | 1.64E+00 |
| New.CleanUp.ReferenceOTU140005 | k__Bacteria;p__Firmicutes;c__Clostridia;o__Clostridiales;f__Lachnospiraceae;g__Dorea;s__                            | 7.17E-03 | 6.20E-01 | 4.48E-02 |
| 333939                         | k__Bacteria;p__Bacteroidetes;c__Bacteroidia;o__Bacteroidales;f__g__s__                                              | 7.19E-03 | 4.93E-01 | 7.91E-01 |
| 293393                         | k__Bacteria;p__Firmicutes;c__Clostridia;o__Clostridiales;f__Veillonellaceae;g__s__                                  | 7.19E-03 | 4.23E-02 | 3.58E-01 |
| 188735                         | k__Bacteria;p__Bacteroidetes;c__Bacteroidia;o__Bacteroidales;f__Bacteroidaceae;g__Bacteroides;s__                   | 7.20E-03 | 5.21E-01 | 1.49E-02 |
| New.CleanUp.ReferenceOTU106879 | k__Bacteria;p__Firmicutes;c__Clostridia;o__Clostridiales;f__Ruminococcaceae;g__s__                                  | 7.24E-03 | 8.45E-02 | 4.18E-01 |
| 195166                         | k__Bacteria;p__Firmicutes;c__Clostridia;o__Clostridiales;f__Lachnospiraceae                                         | 7.27E-03 | 2.52E+00 | 4.57E+00 |
| 2420187                        | k__Bacteria;p__Firmicutes;c__Clostridia;o__Clostridiales;f__Lachnospiraceae;g__s__                                  | 7.39E-03 | 4.93E-01 | 4.48E-02 |
| New.CleanUp.ReferenceOTU40996  | k__Bacteria;p__Firmicutes;c__Clostridia;o__Clostridiales;f__[Mogibacteriaceae];g__s__                               | 7.43E-03 | 2.82E-02 | 2.24E-01 |
| 552235                         | k__Bacteria;p__Firmicutes;c__Clostridia;o__Clostridiales;f__Christensenellaceae;g__Christensenella;s__              | 7.46E-03 | 4.23E-01 | 1.49E-02 |
| New.CleanUp.ReferenceOTU13348  | k__Bacteria;p__Firmicutes;c__Clostridia;o__Clostridiales;f__Lachnospiraceae;g__Blautia;s__                          | 7.46E-03 | 5.77E-01 | 1.49E-02 |
| 628014                         | k__Bacteria;p__Firmicutes;c__Clostridia;o__Clostridiales;f__Lachnospiraceae;g__s__                                  | 7.52E-03 | 7.04E-02 | 5.07E-01 |
| 344947                         | k__Bacteria;p__Firmicutes;c__Clostridia;o__Clostridiales;f__Lachnospiraceae;g__Blautia;s__                          | 7.58E-03 | 6.62E-01 | 1.19E-01 |
| 4428313                        | k__Bacteria;p__Firmicutes;c__Bacilli;o__Lactobacillales;f__Lactobacillaceae;g__Lactobacillus;s__                    | 7.60E-03 | 5.60E+01 | 2.80E+01 |
| 324975                         | k__Bacteria;p__Firmicutes;c__Clostridia;o__Clostridiales;f__Ruminococcaceae;g__s__                                  | 7.64E-03 | 1.41E-01 | 6.57E-01 |
| 182764                         | k__Bacteria;p__Firmicutes;c__Bacilli;o__Lactobacillales;f__Lactobacillaceae;g__Lactobacillus;s__                    | 7.72E-03 | 1.23E+01 | 6.30E+00 |
| New.ReferenceOTU842            | k__Bacteria;p__Bacteroidetes;c__Bacteroidia;o__Bacteroidales;f__Bacteroidaceae;g__BF311;s__                         | 7.75E-03 | 2.25E-01 | 1.45E+00 |
| 290013                         | k__Bacteria;p__Firmicutes;c__Clostridia;o__Clostridiales;f__Lachnospiraceae;g__s__                                  | 7.75E-03 | 1.27E-01 | 6.42E-01 |



|                                |                                                                                                                        |          |          |          |
|--------------------------------|------------------------------------------------------------------------------------------------------------------------|----------|----------|----------|
| 298536                         | k__Bacteria;p__Firmicutes;c__Clostridia;o__Clostridiales;f__Lachnospiraceae;g__s__                                     | 7.76E-03 | 1.08E+01 | 2.06E+00 |
| New.CleanUp.ReferenceOTU153116 | k__Bacteria;p__Proteobacteria;c__Deltaproteobacteria;o__Desulfovibrionales;f__Desulfovibrionaceae;g__Desulfovibrio;s__ | 7.76E-03 | 4.23E-01 | 1.49E-02 |
| New.ReferenceOTU862            | k__Bacteria;p__Firmicutes;c__Clostridia;o__Clostridiales;f__Clostridiaceae;g__Clostridium;s__                          | 7.84E-03 | 1.58E+00 | 3.28E-01 |
| New.ReferenceOTU280            | k__Bacteria;p__Firmicutes;c__Clostridia;o__Clostridiales;f__Lachnospiraceae;g__s__                                     | 7.85E-03 | 7.32E-01 | 9.25E-01 |
| 181167                         | k__Bacteria;p__Firmicutes;c__Clostridia;o__Clostridiales;f__Lachnospiraceae                                            | 7.86E-03 | 5.63E-01 | 2.99E-02 |
| New.ReferenceOTU241            | k__Bacteria;p__Firmicutes;c__Clostridia;o__Clostridiales;f__Lachnospiraceae;g__s__                                     | 7.87E-03 | 1.27E-01 | 1.31E+00 |
| 158211                         | k__Bacteria;p__Firmicutes;c__Clostridia;o__Clostridiales;f__Lachnospiraceae;g__Blautia;s__                             | 7.88E-03 | 2.25E-01 | 1.49E-02 |
| New.ReferenceOTU539            | k__Bacteria;p__Bacteroidetes;c__Bacteroidia;o__Bacteroidales;f__[Paraprevotellaceae];g__YRC22;s__                      | 7.90E-03 | 3.89E+00 | 4.49E+00 |
| 196219                         | k__Bacteria;p__Bacteroidetes;c__Bacteroidia;o__Bacteroidales;f__Bacteroidaceae;g__Bacteroides;s__                      | 7.91E-03 | 4.93E-01 | 7.46E-02 |
| 4420408                        | k__Bacteria;p__Bacteroidetes;c__Bacteroidia;o__Bacteroidales;f__Bacteroidaceae;g__Bacteroides;s__uniformis             | 7.92E-03 | 9.15E-01 | 5.97E-02 |
| 292753                         | k__Bacteria;p__Firmicutes;c__Clostridia;o__Clostridiales;f__Lachnospiraceae;g__s__                                     | 8.03E-03 | 5.61E+00 | 9.28E+00 |
| 348574                         | k__Bacteria;p__Firmicutes;c__Clostridia;o__Clostridiales;f__Lachnospiraceae;g__s__                                     | 8.14E-03 | 1.69E-01 | 7.01E-01 |
| New.CleanUp.ReferenceOTU164171 | k__Bacteria;p__Firmicutes;c__Clostridia;o__Clostridiales;f__g__s__                                                     | 8.14E-03 | 5.35E-01 | 1.33E+00 |
| New.CleanUp.ReferenceOTU88573  | Unassigned                                                                                                             | 8.23E-03 | 5.63E-02 | 3.73E-01 |
| New.ReferenceOTU884            | k__Bacteria;p__Verrucomicrobia;c__Verruco-5;o__WCHB1-41;f__RFP12;g__s__                                                | 8.45E-03 | 3.66E-01 | 1.33E+00 |
| 291949                         | k__Bacteria;p__Firmicutes;c__Clostridia;o__Clostridiales;f__Ruminococcaceae;g__s__                                     | 8.46E-03 | 2.23E+00 | 3.52E+00 |
| 293067                         | k__Bacteria;p__Firmicutes;c__Clostridia;o__Clostridiales;f__Eubacteriaceae;g__Pseudoramibacter_Eubacterium;s__         | 8.62E-03 | 1.04E+00 | 2.61E+00 |
| New.CleanUp.ReferenceOTU40642  | k__Bacteria;p__Firmicutes;c__Erysipelotrichi;o__Erysipelotrichales;f__Erysipelotrichaceae;g__s__                       | 8.63E-03 | 1.15E+00 | 1.19E-01 |
| New.CleanUp.ReferenceOTU122997 | k__Bacteria;p__Firmicutes;c__Clostridia;o__Clostridiales;f__Christensenellaceae;g__s__                                 | 8.63E-03 | 6.48E-01 | 1.94E-01 |
| 2148365                        | k__Bacteria;p__Firmicutes;c__Clostridia;o__Clostridiales;f__Lachnospiraceae;g__s__                                     | 8.72E-03 | 2.08E+00 | 6.81E+00 |
| New.ReferenceOTU397            | k__Bacteria;p__Firmicutes;c__Clostridia;o__Clostridiales;f__g__s__                                                     | 8.77E-03 | 9.86E-01 | 2.69E-01 |
| 295824                         | k__Bacteria;p__Firmicutes;c__Clostridia;o__Clostridiales;f__g__s__                                                     | 8.79E-03 | 8.45E-02 | 8.36E-01 |
| New.ReferenceOTU849            | k__Bacteria;p__Firmicutes;c__Clostridia;o__Clostridiales;f__g__s__                                                     | 8.79E-03 | 2.49E+00 | 8.96E-02 |
| New.ReferenceOTU633            | k__Bacteria;p__Firmicutes;c__Clostridia;o__Clostridiales;f__g__s__                                                     | 8.86E-03 | 4.79E-01 | 2.49E+00 |
| 321348                         | k__Bacteria;p__Firmicutes;c__Clostridia;o__Clostridiales;f__Christensenellaceae;g__s__                                 | 8.92E-03 | 1.55E-01 | 8.06E-01 |
| New.ReferenceOTU335            | k__Bacteria;p__Firmicutes;c__Clostridia;o__Clostridiales;f__Eubacteriaceae;g__Pseudoramibacter_Eubacterium;s__         | 9.10E-03 | 2.27E+00 | 4.21E+00 |
| 2545906                        | k__Bacteria;p__Bacteroidetes;c__Bacteroidia;o__Bacteroidales;f__Porphyromonadaceae;g__Parabacteroides;s__distasonis    | 9.14E-03 | 2.44E+00 | 4.63E-01 |
| 4435305                        | k__Bacteria;p__Firmicutes;c__Clostridia;o__Clostridiales;f__Ruminococcaceae;g__s__                                     | 9.19E-03 | 6.90E-01 | 1.24E+00 |
| New.ReferenceOTU178            | k__Bacteria;p__Firmicutes;c__Clostridia;o__Clostridiales;f__Ruminococcaceae;g__Ruminococcus;s__                        | 9.20E-03 | 2.68E-01 | 2.84E+00 |
| New.CleanUp.ReferenceOTU87504  | k__Bacteria;p__Actinobacteria;c__Coriobacteriia;o__Coriobacteriales;f__Coriobacteriaceae;g__s__                        | 9.21E-03 | 0.00E+00 | 1.94E-01 |
| 560677                         | k__Bacteria;p__Bacteroidetes;c__Bacteroidia;o__Bacteroidales;f__g__s__                                                 | 9.21E-03 | 0.00E+00 | 5.67E-01 |
| New.CleanUp.ReferenceOTU117661 | k__Bacteria;p__Bacteroidetes;c__Bacteroidia;o__Bacteroidales;f__g__s__                                                 | 9.22E-03 | 0.00E+00 | 2.69E-01 |

|                                |                                                                                                               |          |          |          |
|--------------------------------|---------------------------------------------------------------------------------------------------------------|----------|----------|----------|
| 182647                         | k_Bacteria;p_Firmicutes;c_Clostridia;o_Clostridiales;f_g_s                                                    | 9.22E-03 | 0.00E+00 | 5.67E-01 |
| New.CleanUp.ReferenceOTU14343  | k_Bacteria;p_Firmicutes;c_Clostridia;o_Clostridiales;f_Ruminococcaceae;g_s                                    | 9.22E-03 | 0.00E+00 | 3.43E-01 |
| 298743                         | k_Bacteria;p_Bacteroidetes;c_Bacteroidia;o_Bacteroidales;f_RF16;g_s                                           | 9.22E-03 | 0.00E+00 | 5.22E-01 |
| New.CleanUp.ReferenceOTU141183 | k_Bacteria;p_Firmicutes;c_Clostridia;o_Clostridiales;f_g_s                                                    | 9.22E-03 | 0.00E+00 | 3.88E-01 |
| New.CleanUp.ReferenceOTU91395  | k_Bacteria;p_Firmicutes;c_Clostridia;o_Clostridiales;f_Ruminococcaceae;g_s                                    | 9.22E-03 | 0.00E+00 | 1.04E+00 |
| 185281                         | k_Bacteria;p_Firmicutes;c_Clostridia;o_Clostridiales;f_Lachnospiraceae;g_Dorea;s                              | 9.24E-03 | 4.37E-01 | 7.46E-02 |
| New.CleanUp.ReferenceOTU121174 | k_Bacteria;p_Firmicutes;c_Clostridia;o_Clostridiales;f_g_s                                                    | 9.29E-03 | 8.45E-02 | 3.73E-01 |
| 354971                         | k_Bacteria;p_Firmicutes;c_Bacilli;o_Lactobacillales;f_Lactobacillaceae;g_Lactobacillus;s                      | 9.38E-03 | 9.58E-01 | 1.94E-01 |
| New.CleanUp.ReferenceOTU127670 | k_Bacteria;p_Bacteroidetes;c_Bacteroidia;o_Bacteroidales;f_g_s                                                | 9.46E-03 | 2.82E-02 | 3.73E-01 |
| 4409280                        | k_Bacteria;p_Firmicutes;c_Clostridia;o_Clostridiales;f_g_s                                                    | 9.53E-03 | 2.54E-01 | 1.01E+00 |
| 196453                         | k_Bacteria;p_Firmicutes;c_Clostridia;o_Clostridiales;f_Christensenellaceae;g_s                                | 9.57E-03 | 3.38E-01 | 4.48E-02 |
| 192262                         | k_Bacteria;p_Firmicutes;c_Clostridia;o_Clostridiales;f_Ruminococcaceae;g_Ruminococcus;s                       | 9.59E-03 | 3.10E-01 | 4.48E-02 |
| New.CleanUp.ReferenceOTU131032 | k_Bacteria;p_Bacteroidetes;c_Bacteroidia;o_Bacteroidales;f_g_s                                                | 9.79E-03 | 5.63E-02 | 1.06E+00 |
| 594119                         | k_Bacteria;p_Firmicutes;c_Clostridia;o_Clostridiales;f_Ruminococcaceae;g_s                                    | 9.80E-03 | 1.55E+00 | 7.91E-01 |
| 290146                         | k_Bacteria;p_Firmicutes;c_Clostridia;o_Clostridiales;f_Lachnospiraceae;g_Blautia;s                            | 9.80E-03 | 2.04E+00 | 4.09E+00 |
| 299426                         | k_Bacteria;p_Bacteroidetes;c_Bacteroidia;o_Bacteroidales;f_g_s                                                | 9.89E-03 | 5.92E-01 | 3.54E+00 |
| 1522739                        | k_Bacteria;p_Firmicutes;c_Clostridia;o_Clostridiales;f_Clostridiaceae;g_s                                     | 9.91E-03 | 6.48E-01 | 1.79E-01 |
| 346119                         | k_Bacteria;p_Firmicutes;c_Clostridia;o_Clostridiales;f_Ruminococcaceae;g_s                                    | 9.97E-03 | 8.45E-02 | 6.12E-01 |
| 4467134                        | k_Bacteria;p_Verrucomicrobia;c_Verruco-5;o_WCHB1-41;f_RFP12;g_s                                               | 1.01E-02 | 1.69E-01 | 7.31E-01 |
| 343926                         | k_Bacteria;p_Verrucomicrobia;c_Verruco-5;o_WCHB1-41;f_RFP12;g_s                                               | 1.01E-02 | 2.82E-02 | 7.16E-01 |
| New.CleanUp.ReferenceOTU164269 | k_Bacteria;p_Firmicutes;c_Clostridia;o_Clostridiales;f_Ruminococcaceae;g_s                                    | 1.02E-02 | 2.39E-01 | 9.85E-01 |
| 725212                         | k_Bacteria;p_Firmicutes;c_Clostridia;o_Clostridiales;f_g_s                                                    | 1.02E-02 | 2.15E+00 | 7.01E-01 |
| New.ReferenceOTU320            | k_Bacteria;p_Firmicutes;c_Erysipelotrichi;o_Erysipelotrichales;f_Erysipelotrichaceae;g_p-75-a5;s              | 1.03E-02 | 1.69E-01 | 7.91E-01 |
| 288106                         | k_Bacteria;p_Fibrobacteres;c_Fibrobacteria;o_Fibrobacteriales;f_Fibrobacteraceae;g_Fibrobacter;s_succinogenes | 1.03E-02 | 3.94E-01 | 1.51E+00 |
| 287724                         | k_Bacteria;p_Firmicutes;c_Clostridia;o_Clostridiales;f_Ruminococcaceae;g_s                                    | 1.03E-02 | 1.27E-01 | 5.97E-01 |
| 1654477                        | k_Bacteria;p_Fusobacteria;c_Fusobacteriia;o_Fusobacteriales;f_Fusobacteriaceae;g_Fusobacterium;s              | 1.03E-02 | 5.65E+00 | 9.70E-01 |
| 309641                         | k_Bacteria;p_Bacteroidetes;c_Bacteroidia;o_Bacteroidales;f_g_s                                                | 1.03E-02 | 1.41E-02 | 3.96E+00 |
| New.ReferenceOTU817            | k_Bacteria;p_Firmicutes;c_Clostridia;o_Clostridiales;f_Christensenellaceae;g_s                                | 1.03E-02 | 3.52E-01 | 8.96E-01 |
| New.CleanUp.ReferenceOTU42501  | k_Bacteria;p_Firmicutes;c_Clostridia;o_Clostridiales;f_Ruminococcaceae;g_s                                    | 1.03E-02 | 1.07E+00 | 2.09E-01 |
| 179319                         | k_Bacteria;p_Firmicutes;c_Clostridia;o_Clostridiales;f_Lachnospiraceae;g_Dorea;s                              | 1.03E-02 | 2.39E-01 | 0.00E+00 |
| 1136387                        | k_Bacteria;p_Actinobacteria;c_Actinobacteria;o_Bifidobacteriales;f_Bifidobacteriaceae;g_s                     | 1.03E-02 | 8.03E-01 | 8.96E-02 |
| 336232                         | k_Bacteria;p_Firmicutes;c_Clostridia;o_Clostridiales;f_Clostridiaceae;g_Sarcina;s                             | 1.03E-02 | 1.97E-01 | 7.16E-01 |

|                                |                                                                                                           |          |          |          |
|--------------------------------|-----------------------------------------------------------------------------------------------------------|----------|----------|----------|
| 314853                         | k_Bacteria;p_Firmicutes;c_Clostridia;o_Clostridiales;f_[Mogibacteriaceae];g__;s__                         | 1.03E-02 | 2.11E-01 | 0.00E+00 |
| New.CleanUp.ReferenceOTU139005 | k_Bacteria;p_Firmicutes;c_Bacilli;o_Lactobacillales;f_Carnobacteriaceae;g_Desemzia;s__                    | 1.03E-02 | 2.25E-01 | 0.00E+00 |
| New.CleanUp.ReferenceOTU127248 | k_Bacteria;p_Firmicutes;c_Clostridia;o_Clostridiales;f_Lachnospiraceae                                    | 1.03E-02 | 2.39E-01 | 0.00E+00 |
| 85594                          | k_Bacteria;p_Firmicutes;c_Clostridia;o_Clostridiales;f_Veillonellaceae;g_Veillonella;s_dispar             | 1.03E-02 | 3.80E-01 | 0.00E+00 |
| New.ReferenceOTU941            | k_Bacteria;p_Firmicutes;c_Clostridia;o_Clostridiales;f_Lachnospiraceae;g__;s__                            | 1.03E-02 | 4.23E-01 | 0.00E+00 |
| 296487                         | k_Bacteria;p_Firmicutes;c_Clostridia;o_Clostridiales;f_Lachnospiraceae;g__;s__                            | 1.03E-02 | 2.54E-01 | 0.00E+00 |
| 197624                         | k_Bacteria;p_Firmicutes;c_Clostridia;o_Clostridiales;f_Ruminococcaceae;g_Oscillospira;s__                 | 1.03E-02 | 3.52E-01 | 0.00E+00 |
| New.CleanUp.ReferenceOTU160061 | k_Bacteria;p_Firmicutes;c_Clostridia;o_Clostridiales;f_Ruminococcaceae;g__;s__                            | 1.03E-02 | 4.08E-01 | 0.00E+00 |
| New.ReferenceOTU420            | k_Bacteria;p_Firmicutes;c_Clostridia;o_Clostridiales                                                      | 1.03E-02 | 2.68E-01 | 0.00E+00 |
| 171547                         | k_Bacteria;p_Firmicutes;c_Clostridia;o_Clostridiales;f_Ruminococcaceae;g__;s__                            | 1.03E-02 | 3.94E-01 | 0.00E+00 |
| New.ReferenceOTU433            | k_Bacteria;p_Actinobacteria;c_Coriobacteriia;o_Coriobacteriales;f_Coriobacteriaceae;g__;s__               | 1.03E-02 | 7.04E-02 | 3.43E-01 |
| 4356080                        | k_Bacteria;p_Bacteroidetes;c_Bacteroidia;o_Bacteroidales;f_[Barnesiellaceae];g__;s__                      | 1.03E-02 | 6.34E-01 | 0.00E+00 |
| 845396                         | k_Bacteria;p_Firmicutes;c_Clostridia;o_Clostridiales;f__;g__;s__                                          | 1.03E-02 | 5.92E-01 | 0.00E+00 |
| 720093                         | k_Bacteria;p_Firmicutes;c_Clostridia;o_Clostridiales;f_Ruminococcaceae;g__;s__                            | 1.03E-02 | 8.73E-01 | 0.00E+00 |
| New.ReferenceOTU45             | k_Bacteria;p_Firmicutes;c_Clostridia;o_Clostridiales;f_Ruminococcaceae;g__;s__                            | 1.05E-02 | 1.28E+00 | 2.24E-01 |
| New.CleanUp.ReferenceOTU55699  | k_Bacteria;p_Actinobacteria;c_Coriobacteriia;o_Coriobacteriales;f_Coriobacteriaceae;g__;s__               | 1.05E-02 | 1.41E-02 | 2.69E-01 |
| New.ReferenceOTU742            | k_Bacteria;p_Bacteroidetes;c_Bacteroidia;o_Bacteroidales;f__;g__;s__                                      | 1.05E-02 | 4.08E-01 | 1.15E+00 |
| 413275                         | k_Bacteria;p_Firmicutes;c_Clostridia;o_Clostridiales;f_Ruminococcaceae;g__;s__                            | 1.06E-02 | 4.17E+00 | 2.24E-01 |
| 301182                         | k_Bacteria;p_Firmicutes;c_Clostridia;o_Clostridiales;f_Ruminococcaceae;g__;s__                            | 1.06E-02 | 1.41E-02 | 2.69E-01 |
| New.CleanUp.ReferenceOTU19178  | k_Bacteria;p_Firmicutes;c_Clostridia;o_Clostridiales;f_Lachnospiraceae;g__;s__                            | 1.06E-02 | 1.41E-02 | 2.84E-01 |
| New.ReferenceOTU121            | k_Bacteria;p_Firmicutes;c_Clostridia;o_Clostridiales;f_Lachnospiraceae                                    | 1.08E-02 | 5.92E-01 | 1.49E-01 |
| New.CleanUp.ReferenceOTU8329   | k_Bacteria;p_Firmicutes;c_Clostridia;o_Clostridiales;f_Ruminococcaceae;g__Ruminococcus;s__                | 1.09E-02 | 8.45E-02 | 5.82E-01 |
| 105109                         | k_Bacteria;p_Firmicutes;c_Clostridia;o_Clostridiales;f__;g__;s__                                          | 1.09E-02 | 1.39E+00 | 3.34E+00 |
| 4357353                        | k_Bacteria;p_Firmicutes;c_Clostridia;o_Clostridiales;f__;g__;s__                                          | 1.09E-02 | 8.17E-01 | 4.48E-02 |
| New.ReferenceOTU84             | k_Bacteria;p_Firmicutes;c_Clostridia;o_Clostridiales;f__;g__;s__                                          | 1.10E-02 | 1.83E-01 | 7.31E-01 |
| 111003                         | k_Bacteria;p_Firmicutes;c_Clostridia;o_Clostridiales;f_Lachnospiraceae;g__;s__                            | 1.11E-02 | 5.63E+00 | 1.19E+01 |
| 296661                         | k_Bacteria;p_Firmicutes;c_Clostridia;o_Clostridiales;f_Lachnospiraceae;g__;s__                            | 1.12E-02 | 8.45E-02 | 3.58E-01 |
| 4434268                        | k_Bacteria;p_Firmicutes;c_Clostridia;o_Clostridiales;f_Eubacteriaceae;g__Pseudoramibacter_Eubacterium;s__ | 1.12E-02 | 1.87E+00 | 2.99E-02 |
| 302670                         | k_Bacteria;p_Spirochaetes;c_Spirochaetes;o_Spirochaetales;f_Spirochaetaceae;g__Treponema;s__              | 1.12E-02 | 3.66E-01 | 1.28E+00 |
| New.CleanUp.ReferenceOTU78421  | k_Bacteria;p_Firmicutes;c_Clostridia;o_Clostridiales;f_Lachnospiraceae;g__Blautia;s__                     | 1.13E-02 | 4.08E-01 | 3.16E+00 |
| 4436046                        | k_Bacteria;p_Firmicutes;c_Clostridia;o_Clostridiales;f_Lachnospiraceae;g__Dorea;s__                       | 1.13E-02 | 1.15E+01 | 2.91E+00 |
| 296697                         | k_Bacteria;p_Firmicutes;c_Clostridia;o_Clostridiales;f_Lachnospiraceae;g__;s__                            | 1.13E-02 | 4.23E-02 | 3.88E-01 |

|                                |                                                                                                    |          |          |          |
|--------------------------------|----------------------------------------------------------------------------------------------------|----------|----------|----------|
| 99331                          | k_Bacteria;p_Firmicutes;c_Bacilli;o_Bacillales;f_Bacillaceae;g_Bacillus;s_                         | 1.14E-02 | 2.90E+01 | 1.42E+01 |
| 305146                         | k_Bacteria;p_Firmicutes;c_Clostridia;o_Clostridiales;f_Ruminococcaceae;g_                          | 1.14E-02 | 2.39E+01 | 2.13E+00 |
| 290037                         | k_Bacteria;p_Armatimonadetes;c_SJA-176;o_RB046;f_g_s_                                              | 1.15E-02 | 4.08E+01 | 6.72E+01 |
| 365536                         | k_Bacteria;p_Firmicutes;c_Clostridia;o_Clostridiales;f_Ruminococcaceae;g_                          | 1.15E-02 | 3.94E+01 | 4.48E+02 |
| 305214                         | k_Bacteria;p_Firmicutes;c_Clostridia;o_Clostridiales;f_g_s_                                        | 1.15E-02 | 1.41E+01 | 1.24E+00 |
| 42492                          | k_Bacteria;p_Firmicutes;c_Clostridia;o_Clostridiales;f_Lachnospiraceae;g_                          | 1.16E-02 | 7.46E+01 | 1.64E+00 |
| New.CleanUp.ReferenceOTU74444  | k_Bacteria;p_Proteobacteria;c_Alphaproteobacteria;o_RF32;f_g_s_                                    | 1.16E-02 | 2.82E+02 | 6.72E+01 |
| 299108                         | k_Bacteria;p_Firmicutes;c_Clostridia;o_Clostridiales;f_[Mogibacteriaceae];                         | 1.17E-02 | 2.75E+00 | 4.51E+00 |
| 147100                         | g_Mogibacterium;s_                                                                                 | 1.17E-02 | 1.72E+00 | 2.54E+01 |
| 147100                         | k_Bacteria;p_Firmicutes;c_Clostridia;o_Clostridiales;f_Ruminococcaceae;g_                          | 1.18E-02 | 1.72E+00 | 2.54E+01 |
| New.ReferenceOTU353            | k_Archaea;p_Euryarchaeota;c_Methanobacteria;o_Methanobacteriales;f_                                | 1.18E-02 | 5.21E+01 | 1.33E+00 |
| New.ReferenceOTU454            | Methanobacteriaceae;g_Methanobrevibacter;s_                                                        | 1.18E-02 | 3.96E+00 | 1.34E+01 |
| New.ReferenceOTU20             | k_Bacteria;p_Bacteroidetes;c_Bacteroidia;o_Bacteroidales;f_[Paraprevotellaceae];g_CF231;s_         | 1.18E-02 | 8.03E+01 | 1.94E+01 |
| New.ReferenceOTU20             | k_Bacteria;p_Firmicutes;c_Clostridia;o_Clostridiales;f_Christensenellaceae                         | 1.19E-02 | 8.45E+02 | 1.01E+00 |
| 1030770                        | ;g_s_                                                                                              | 1.20E-02 | 3.38E+01 | 8.96E+02 |
| 196898                         | k_Bacteria;p_Tenericutes;c_Mollicutes;o_RF39;f_g_s_                                                | 1.21E-02 | 4.39E+00 | 1.79E+00 |
| 300618                         | k_Bacteria;p_Firmicutes;c_Clostridia;o_Clostridiales;f_g_s_                                        | 1.21E-02 | 9.86E+02 | 8.36E+01 |
| 293977                         | k_Bacteria;p_Firmicutes;c_Clostridia;o_Clostridiales;f_Christensenellaceae                         | 1.21E-02 | 5.38E+00 | 2.58E+00 |
| 4381878                        | ;g_s_                                                                                              | 1.23E-02 | 4.23E+02 | 2.84E+01 |
| New.CleanUp.ReferenceOTU96696  | k_Bacteria;p_Verrucomicrobia;c_Verrucomicrobiae;o_WCHB1-41;f_RFP12;g_s_                            | 1.24E-02 | 3.80E+01 | 1.49E+02 |
| 4296366                        | k_Bacteria;p_Firmicutes;c_Bacilli;o_Bacillales;f_Planococcaceae;g_s_                               | 1.25E-02 | 1.97E+01 | 1.72E+00 |
| New.CleanUp.ReferenceOTU37986  | k_Bacteria;p_Bacteroidetes;c_Bacteroidia;o_Bacteroidales;f_[Paraprevotellaceae];g_s_               | 1.25E-02 | 4.79E+01 | 1.49E+02 |
| New.ReferenceOTU225            | k_Bacteria;p_Firmicutes;c_Bacilli;o_Lactobacillales;f_Carnobacteriaceae;g_                         | 1.25E-02 | 6.48E+01 | 2.99E+02 |
| New.ReferenceOTU225            | Desemzia;s_                                                                                        | 1.25E-02 | 6.20E+01 | 2.99E+02 |
| New.CleanUp.ReferenceOTU43165  | k_Bacteria;p_Firmicutes;c_Clostridia;o_Clostridiales;f_Ruminococcaceae;g_                          | 1.25E-02 | 1.10E+00 | 1.94E+01 |
| 185411                         | k_Bacteria;p_Firmicutes;c_Clostridia;o_Clostridiales;f_Lachnospiraceae;g_                          | 1.25E-02 | 4.23E+01 | 1.40E+00 |
| 191052                         | _Roseburia;s_                                                                                      | 1.25E-02 | 1.41E+01 | 6.57E+01 |
| 191052                         | k_Bacteria;p_Firmicutes;c_Clostridia;o_Clostridiales;f_Lachnospiraceae                             | 1.25E-02 | 4.37E+01 | 1.49E+02 |
| New.ReferenceOTU230            | k_Bacteria;p_Verrucomicrobia;c_Verrucomicrobiae;o_Verrucomicrobiales;f_                            | 1.25E-02 | 7.04E+02 | 5.97E+01 |
| 168625                         | Verrucomicrobiaceae;g_Akkermansia;s_                                                               | 1.25E-02 | 2.74E+01 | 2.20E+01 |
| 190913                         | k_Bacteria;p_Firmicutes;c_Clostridia;o_Clostridiales;f_g_s_                                        | 1.26E-02 | 1.83E+01 | 6.57E+01 |
| New.CleanUp.ReferenceOTU118339 | k_Bacteria;p_Bacteroidetes;c_Bacteroidia;o_Bacteroidales;f_Porphyromonadaceae;g_Parabacteroides;s_ | 1.27E-02 | 2.54E+01 | 1.28E+00 |
| 238208                         | k_Bacteria;p_Firmicutes;c_Clostridia;o_Clostridiales;f_Lachnospiraceae;g_                          | 1.27E-02 | 7.61E+01 | 1.49E+01 |
| New.CleanUp.ReferenceOTU9926   | ;s_                                                                                                | 1.27E-02 | 2.74E+01 | 2.20E+01 |
| New.CleanUp.ReferenceOTU9926   | k_Bacteria;p_Firmicutes;c_Clostridia;o_Clostridiales;f_Ruminococcaceae;g_                          | 1.27E-02 | 1.83E+01 | 6.57E+01 |
| New.ReferenceOTU134            | k_Bacteria;p_Firmicutes;c_Clostridia;o_Clostridiales;f_Ruminococcaceae;g_                          | 1.28E-02 | 2.54E+01 | 1.28E+00 |
| New.CleanUp.ReferenceOTU42736  | ;s_                                                                                                | 1.28E-02 | 7.61E+01 | 1.49E+01 |
| New.CleanUp.ReferenceOTU42736  | k_Bacteria;p_Firmicutes;c_Clostridia;o_Clostridiales;f_Christensenellaceae                         | 1.28E-02 | 7.61E+01 | 1.49E+01 |
| New.CleanUp.ReferenceOTU42736  | ;g_s_                                                                                              | 1.28E-02 | 7.61E+01 | 1.49E+01 |

|                                |                                                                                                                               |          |          |          |
|--------------------------------|-------------------------------------------------------------------------------------------------------------------------------|----------|----------|----------|
| 646499                         | k__Bacteria;p__Firmicutes;c__Clostridia;o__Clostridiales;f__g__s__                                                            | 1.28E-02 | 8.45E-02 | 3.73E-01 |
| 324112                         | k__Bacteria;p__Firmicutes;c__Clostridia;o__Clostridiales;f__g__s__                                                            | 1.28E-02 | 4.97E+00 | 5.67E-01 |
| New.CleanUp.ReferenceOTU31707  | k__Bacteria;p__Firmicutes;c__Clostridia;o__Clostridiales;f__Lachnospiraceae;g__s__                                            | 1.28E-02 | 1.69E-01 | 3.43E-01 |
| 455746                         | k__Bacteria;p__Firmicutes;c__Clostridia;o__Clostridiales;f__Lachnospiraceae;g__s__                                            | 1.29E-02 | 1.03E+00 | 2.33E+00 |
| 518065                         | k__Bacteria;p__Actinobacteria;c__Actinobacteria;o__Actinomycetales;f__Corynebacteriaceae;g__Corynebacterium;s__               | 1.29E-02 | 5.92E-01 | 1.49E-02 |
| 536989                         | k__Bacteria;p__Firmicutes;c__Clostridia;o__Clostridiales;f__g__s__                                                            | 1.29E-02 | 2.32E+00 | 1.49E-02 |
| 351126                         | k__Bacteria;p__Firmicutes;c__Clostridia;o__Clostridiales;f__Ruminococcaceae;g__s__                                            | 1.29E-02 | 7.04E-02 | 4.63E-01 |
| New.CleanUp.ReferenceOTU12933  | k__Bacteria;p__Verrucomicrobia;c__Verrucomicrobiae;o__Verrucomicrobiales;f__Verrucomicrobiaceae;g__Akkermansia;s__muciniphila | 1.30E-02 | 1.21E+00 | 2.39E-01 |
| 4458227                        | k__Bacteria;p__Firmicutes;c__Clostridia;o__Clostridiales;f__g__s__                                                            | 1.30E-02 | 5.49E-01 | 2.99E-02 |
| New.CleanUp.ReferenceOTU90     | k__Bacteria;p__Firmicutes;c__Clostridia;o__Clostridiales;f__Ruminococcaceae;g__Ruminococcus;s__                               | 1.30E-02 | 3.52E-01 | 1.49E-02 |
| 337246                         | k__Bacteria;p__Firmicutes;c__Clostridia;o__Clostridiales;f__g__s__                                                            | 1.31E-02 | 2.11E-01 | 1.49E-02 |
| 342575                         | k__Bacteria;p__Firmicutes;c__Clostridia;o__Clostridiales;f__Ruminococcaceae;g__s__                                            | 1.32E-02 | 8.87E-01 | 1.19E-01 |
| 294219                         | k__Bacteria;p__Firmicutes;c__Clostridia;o__Clostridiales;f__Lachnospiraceae;g__[Ruminococcus];s__gnavus                       | 1.33E-02 | 7.89E-01 | 5.97E-02 |
| New.CleanUp.ReferenceOTU33135  | k__Bacteria;p__Firmicutes;c__Clostridia;o__Clostridiales;f__Ruminococcaceae;g__s__                                            | 1.34E-02 | 2.11E-01 | 5.52E-01 |
| New.CleanUp.ReferenceOTU40927  | k__Bacteria;p__Firmicutes;c__Clostridia;o__Clostridiales;f__Ruminococcaceae;g__s__                                            | 1.35E-02 | 8.03E-01 | 1.79E-01 |
| 337468                         | k__Bacteria;p__Firmicutes;c__Clostridia;o__Clostridiales;f__Ruminococcaceae;g__Oscillospira;s__                               | 1.36E-02 | 4.13E+00 | 2.12E+00 |
| 175535                         | k__Bacteria;p__Bacteroidetes;c__Bacteroidia;o__Bacteroidales;f__Bacteroidaceae;g__Bacteroides;s__                             | 1.36E-02 | 7.18E-01 | 8.96E-02 |
| 1992                           | k__Bacteria;p__Bacteroidetes;c__Bacteroidia;o__Bacteroidales;f__Bacteroidaceae;g__Bacteroides;s__ovatus                       | 1.36E-02 | 7.32E-01 | 1.19E-01 |
| New.CleanUp.ReferenceOTU3646   | k__Bacteria;p__Firmicutes;c__Clostridia;o__Clostridiales;f__Ruminococcaceae;g__s__                                            | 1.39E-02 | 3.66E-01 | 9.40E-01 |
| 318959                         | k__Bacteria;p__Firmicutes;c__Clostridia;o__Clostridiales;f__Ruminococcaceae;g__s__                                            | 1.40E-02 | 2.28E+00 | 2.54E-01 |
| New.CleanUp.ReferenceOTU154333 | k__Bacteria;p__Firmicutes;c__Clostridia;o__Clostridiales;f__Lachnospiraceae;g__Dorea;s__                                      | 1.42E-02 | 6.76E-01 | 1.79E-01 |
| New.CleanUp.ReferenceOTU151654 | k__Bacteria;p__Firmicutes;c__Clostridia;o__Clostridiales;f__Lachnospiraceae;g__Dorea;s__                                      | 1.43E-02 | 4.37E-01 | 5.97E-02 |
| 293575                         | k__Bacteria;p__Firmicutes;c__Clostridia;o__Clostridiales;f__Ruminococcaceae;g__s__                                            | 1.43E-02 | 1.13E+00 | 1.49E-01 |
| New.CleanUp.ReferenceOTU170390 | k__Bacteria;p__Firmicutes;c__Clostridia;o__Clostridiales;f__Lachnospiraceae;g__Dorea;s__                                      | 1.43E-02 | 6.90E-01 | 8.96E-02 |
| New.ReferenceOTU503            | k__Bacteria;p__Firmicutes;c__Clostridia;o__Clostridiales;f__Lachnospiraceae;g__s__                                            | 1.44E-02 | 5.92E-01 | 1.04E+00 |
| New.CleanUp.ReferenceOTU167381 | k__Bacteria;p__Firmicutes;c__Clostridia;o__Clostridiales;f__Ruminococcaceae;g__s__                                            | 1.44E-02 | 2.39E-01 | 6.42E-01 |
| 588624                         | k__Bacteria;p__Firmicutes;c__Clostridia;o__Clostridiales;f__Ruminococcaceae;g__Ruminococcus;s__                               | 1.46E-02 | 2.82E-01 | 9.85E-01 |
| 289388                         | k__Bacteria;p__Firmicutes;c__Bacilli;o__Bacillales;f__Planococcaceae;g__s__                                                   | 1.48E-02 | 1.76E+00 | 5.97E-02 |
| 568968                         | k__Bacteria;p__Firmicutes;c__Clostridia;o__Clostridiales;f__g__s__                                                            | 1.48E-02 | 8.87E-01 | 7.46E-02 |
| New.CleanUp.ReferenceOTU24612  | k__Bacteria;p__Tenericutes;c__Mollicutes;o__RF39;f__g__s__                                                                    | 1.48E-02 | 3.38E-01 | 2.99E-02 |
| New.ReferenceOTU273            | k__Bacteria;p__Bacteroidetes;c__Bacteroidia;o__Bacteroidales;f__g__s__                                                        | 1.48E-02 | 1.01E+00 | 3.90E+00 |
| New.ReferenceOTU759            | k__Bacteria;p__Firmicutes;c__Clostridia;o__Clostridiales;f__Lachnospiraceae;g__s__                                            | 1.48E-02 | 4.65E-01 | 8.96E-02 |

|                                |                                                                                                                        |          |          |          |
|--------------------------------|------------------------------------------------------------------------------------------------------------------------|----------|----------|----------|
| 953855                         | k__Bacteria;p__Bacteroidetes;c__Bacteroidia;o__Bacteroidales;f__Rikenellaceae;g__s__                                   | 1.48E-02 | 2.08E+00 | 9.10E-01 |
| New.CleanUp.ReferenceOTU39278  | k__Bacteria;p__Firmicutes;c__Clostridia;o__Clostridiales;f__Lachnospiraceae                                            | 1.48E-02 | 7.04E-02 | 4.93E-01 |
| 298928                         | k__Bacteria;p__Bacteroidetes;c__Bacteroidia;o__Bacteroidales;f__g__s__                                                 | 1.49E-02 | 4.79E-01 | 1.31E+00 |
| New.CleanUp.ReferenceOTU54613  | k__Bacteria;p__Firmicutes;c__Clostridia;o__Clostridiales;f__g__s__                                                     | 1.49E-02 | 1.38E+00 | 1.49E-01 |
| New.CleanUp.ReferenceOTU8428   | k__Bacteria;p__Firmicutes;c__Clostridia;o__Clostridiales;f__Clostridiaceae;g__Sarcina;s__                              | 1.51E-02 | 2.82E-01 | 6.87E-01 |
| 296342                         | k__Bacteria;p__Bacteroidetes;c__Bacteroidia;o__Bacteroidales;f__g__s__                                                 | 1.53E-02 | 1.55E+00 | 7.16E+00 |
| 293666                         | k__Bacteria;p__Firmicutes;c__Clostridia;o__Clostridiales;f__Lachnospiraceae;g__Blautia;s__                             | 1.53E-02 | 8.45E-02 | 7.01E-01 |
| 312347                         | k__Bacteria;p__Firmicutes;c__Clostridia;o__Clostridiales;f__Ruminococcaceae;g__s__                                     | 1.53E-02 | 1.37E+01 | 6.81E+00 |
| 324236                         | k__Bacteria;p__Firmicutes;c__Clostridia;o__Clostridiales;f__Lachnospiraceae;g__[Ruminococcus];s__                      | 1.53E-02 | 5.77E-01 | 5.97E-02 |
| New.ReferenceOTU509            | k__Bacteria;p__Spirochaetes;c__MVP-15;o__PL-11B10;f__g__s__                                                            | 1.53E-02 | 9.30E+00 | 1.88E+01 |
| 288723                         | k__Bacteria;p__Firmicutes;c__Bacilli;o__Lactobacillales;f__Lactobacillaceae;g__Lactobacillus;s__                       | 1.54E-02 | 8.45E-01 | 2.39E-01 |
| 304883                         | k__Bacteria;p__Firmicutes;c__Clostridia;o__Clostridiales;f__g__s__                                                     | 1.55E-02 | 1.39E+00 | 2.76E+00 |
| New.ReferenceOTU733            | k__Bacteria;p__Actinobacteria;c__Coriobacteriia;o__Coriobacteriales;f__Coriobacteriaceae;g__Adlercreutzia;s__          | 1.56E-02 | 1.55E-01 | 7.91E-01 |
| New.CleanUp.ReferenceOTU169984 | k__Bacteria;p__Proteobacteria;c__Deltaproteobacteria;o__Desulfovibrionales;f__Desulfovibrionaceae;g__Desulfovibrio;s__ | 1.56E-02 | 4.23E-02 | 3.13E-01 |
| New.ReferenceOTU487            | Unassigned                                                                                                             | 1.57E-02 | 2.82E-02 | 5.37E-01 |
| 313274                         | k__Bacteria;p__Firmicutes;c__Clostridia;o__Clostridiales;f__Ruminococcaceae;g__Oscillospira;s__                        | 1.59E-02 | 2.96E-01 | 7.46E-02 |
| 291998                         | k__Bacteria;p__Firmicutes;c__Clostridia;o__Clostridiales;f__Lachnospiraceae;g__s__                                     | 1.59E-02 | 3.10E-01 | 1.00E+00 |
| 4317038                        | k__Bacteria;p__Firmicutes;c__Clostridia;o__Clostridiales;f__g__s__                                                     | 1.59E-02 | 0.00E+00 | 1.49E-01 |
| 628517                         | k__Bacteria;p__Lentisphaerae;c__[Lentisphaeria];o__Victivallales;f__Victivallaceae;g__s__                              | 1.59E-02 | 0.00E+00 | 6.72E-01 |
| New.ReferenceOTU410            | k__Bacteria;p__Firmicutes;c__Clostridia;o__Clostridiales;f__Ruminococcaceae;g__s__                                     | 1.59E-02 | 0.00E+00 | 1.64E-01 |
| New.CleanUp.ReferenceOTU170473 | k__Bacteria;p__Firmicutes;c__Clostridia;o__Clostridiales;f__Lachnospiraceae;g__s__                                     | 1.59E-02 | 0.00E+00 | 1.79E-01 |
| 345788                         | k__Bacteria;p__Firmicutes;c__Clostridia;o__Clostridiales;f__Christensenellaceae;g__s__                                 | 1.59E-02 | 0.00E+00 | 1.79E-01 |
| New.CleanUp.ReferenceOTU98597  | k__Bacteria;p__Firmicutes;c__Clostridia;o__Clostridiales;f__Lachnospiraceae;g__Blautia;s__                             | 1.59E-02 | 0.00E+00 | 1.79E-01 |
| New.CleanUp.ReferenceOTU76844  | k__Bacteria;p__Firmicutes;c__Clostridia;o__Clostridiales;f__[Mogibacteriaceae];g__s__                                  | 1.59E-02 | 0.00E+00 | 1.94E-01 |
| New.CleanUp.ReferenceOTU102172 | k__Bacteria;p__Firmicutes;c__Clostridia;o__Clostridiales;f__Ruminococcaceae;g__s__                                     | 1.59E-02 | 0.00E+00 | 1.94E-01 |
| New.ReferenceOTU697            | k__Bacteria;p__Firmicutes;c__Clostridia;o__Clostridiales;f__Veillonellaceae;g__s__                                     | 1.59E-02 | 0.00E+00 | 2.54E-01 |
| New.CleanUp.ReferenceOTU37183  | k__Bacteria;p__Firmicutes;c__Clostridia;o__Clostridiales;f__Ruminococcaceae;g__s__                                     | 1.59E-02 | 0.00E+00 | 2.09E-01 |
| New.CleanUp.ReferenceOTU178742 | k__Bacteria;p__Firmicutes;c__Clostridia;o__Clostridiales;f__Dehalobacteriaceae;g__Dehalobacterium;s__                  | 1.59E-02 | 0.00E+00 | 2.54E-01 |
| New.CleanUp.ReferenceOTU7146   | k__Bacteria;p__Verrucomicrobia;c__[Pedosphaerae];o__[Pedosphaerales];f__R4-41B;g__s__                                  | 1.59E-02 | 0.00E+00 | 2.39E-01 |
| New.ReferenceOTU311            | k__Bacteria;p__Firmicutes;c__Clostridia;o__Clostridiales;f__Lachnospiraceae;g__s__                                     | 1.59E-02 | 9.30E-01 | 1.49E+00 |
| New.CleanUp.ReferenceOTU13952  | k__Bacteria;p__Spirochaetes;c__Spirochaetes;o__Spirochaetales;f__Spirochaetaceae;g__Treponema;s__                      | 1.59E-02 | 0.00E+00 | 2.39E-01 |
| 109496                         | k__Bacteria;p__Firmicutes;c__Clostridia;o__Clostridiales;f__g__s__                                                     | 1.59E-02 | 0.00E+00 | 4.33E-01 |

|                                |                                                                                                           |          |          |          |
|--------------------------------|-----------------------------------------------------------------------------------------------------------|----------|----------|----------|
| New.CleanUp.ReferenceOTU123344 | k__Bacteria;p__Firmicutes;c__Clostridia;o__Clostridiales;f__Lachnospiraceae;g__[Ruminococcus];s__gnavus   | 1.59E-02 | 0.00E+00 | 3.73E-01 |
| New.CleanUp.ReferenceOTU166320 | k__Bacteria;p__Firmicutes;c__Erysipelotrichi;o__Erysipelotrichales;f__Erysipelotrichaceae;g__p-75-a5;s__  | 1.59E-02 | 0.00E+00 | 4.18E-01 |
| 2256432                        | k__Bacteria;p__Firmicutes;c__Clostridia;o__Clostridiales;f__Lachnospiraceae;g__Dorea;s__                  | 1.59E-02 | 8.45E-01 | 4.33E-01 |
| 331526                         | k__Bacteria;p__Verrucomicrobia;c__[Pedosphaerae];o__[Pedosphaerales];f__R4-41B;g__s__                     | 1.59E-02 | 0.00E+00 | 6.42E-01 |
| 4421273                        | k__Bacteria;p__Firmicutes;c__Clostridia;o__Clostridiales;f__Ruminococcaceae;g__Oscillospira;s__           | 1.59E-02 | 8.31E-01 | 1.34E-01 |
| New.CleanUp.ReferenceOTU59399  | k__Bacteria;p__Firmicutes;c__Clostridia;o__Clostridiales;f__Lachnospiraceae;g__s__                        | 1.59E-02 | 2.82E-02 | 1.00E+00 |
| 307638                         | k__Bacteria;p__Firmicutes;c__Clostridia;o__Clostridiales;f__g__s__                                        | 1.59E-02 | 4.51E-01 | 1.79E+00 |
| 178064                         | k__Bacteria;p__Bacteroidetes;c__Bacteroidia;o__Bacteroidales;f__Bacteroidaceae;g__Bacteroides;s__         | 1.61E-02 | 4.65E-01 | 8.96E-02 |
| New.CleanUp.ReferenceOTU169899 | k__Bacteria;p__Firmicutes;c__Clostridia;o__Clostridiales;f__Ruminococcaceae;g__s__                        | 1.61E-02 | 1.27E-01 | 5.22E-01 |
| New.CleanUp.ReferenceOTU26362  | k__Bacteria;p__Firmicutes;c__Clostridia;o__Clostridiales                                                  | 1.64E-02 | 4.23E-02 | 2.69E-01 |
| 4318552                        | k__Bacteria;p__Firmicutes;c__Clostridia;o__Clostridiales;f__g__s__                                        | 1.64E-02 | 4.23E-02 | 2.99E-01 |
| 193233                         | k__Bacteria;p__Bacteroidetes;c__Bacteroidia;o__Bacteroidales;f__Bacteroidaceae;g__Bacteroides;s__         | 1.64E-02 | 5.35E-01 | 1.49E-01 |
| New.CleanUp.ReferenceOTU165242 | k__Bacteria;p__Firmicutes;c__Clostridia;o__Clostridiales;f__Lachnospiraceae                               | 1.64E-02 | 3.66E-01 | 4.63E-01 |
| 350910                         | k__Bacteria;p__Firmicutes;c__Clostridia;o__Clostridiales;f__Ruminococcaceae;g__s__                        | 1.64E-02 | 1.55E-01 | 7.76E-01 |
| 4343627                        | k__Bacteria;p__Bacteroidetes;c__Bacteroidia;o__Bacteroidales;f__Bacteroidaceae;g__Bacteroides;s__fragilis | 1.64E-02 | 2.59E+01 | 1.14E+01 |
| New.CleanUp.ReferenceOTU33185  | k__Bacteria;p__Firmicutes;c__Clostridia;o__Clostridiales;f__Christensenellaceae;g__s__                    | 1.65E-02 | 4.93E-01 | 1.04E-01 |
| New.ReferenceOTU413            | k__Bacteria;p__Spirochaetes;c__Spirochaetes;o__Spirochaetales;f__Spirochaetaceae;g__Treponema;s__         | 1.66E-02 | 2.82E-02 | 6.27E-01 |
| 3680006                        | k__Bacteria;p__Firmicutes;c__Clostridia;o__Clostridiales;f__Lachnospiraceae;g__Dorea;s__                  | 1.67E-02 | 4.93E-01 | 1.04E-01 |
| 4094866                        | k__Bacteria;p__Firmicutes;c__Clostridia;o__Clostridiales;f__Lachnospiraceae;g__s__                        | 1.67E-02 | 3.38E-01 | 1.58E+00 |
| 115315                         | k__Bacteria;p__Actinobacteria;c__Actinobacteria;o__Actinomycetales;f__Yaniellaceae;g__Yaniella;s__        | 1.68E-02 | 1.01E+00 | 1.94E-01 |
| 172233                         | k__Bacteria;p__Firmicutes;c__Clostridia;o__Clostridiales;f__Ruminococcaceae;g__s__                        | 1.68E-02 | 1.69E-01 | 0.00E+00 |
| New.CleanUp.ReferenceOTU20734  | k__Bacteria;p__Firmicutes;c__Bacilli;o__Lactobacillales;f__Carnobacteriaceae;g__Desemzia;s__              | 1.68E-02 | 1.69E-01 | 0.00E+00 |
| 300383                         | k__Bacteria;p__Firmicutes;c__Clostridia;o__Clostridiales;f__Lachnospiraceae;g__Coproccoccus;s__           | 1.68E-02 | 3.52E-01 | 1.81E+00 |
| 195035                         | k__Bacteria;p__Firmicutes;c__Clostridia;o__Clostridiales;f__g__s__                                        | 1.68E-02 | 1.97E-01 | 0.00E+00 |
| New.CleanUp.ReferenceOTU31828  | k__Bacteria;p__Firmicutes;c__Bacilli;o__Lactobacillales;f__Lactobacillaceae;g__Lactobacillus              | 1.68E-02 | 2.25E-01 | 0.00E+00 |
| New.CleanUp.ReferenceOTU85922  | k__Bacteria;p__Firmicutes;c__Clostridia;o__Clostridiales;f__Lachnospiraceae;g__Blautia;s__                | 1.68E-02 | 2.11E-01 | 0.00E+00 |
| 4381749                        | k__Bacteria;p__Firmicutes;c__Clostridia;o__Clostridiales;f__Ruminococcaceae;g__s__                        | 1.68E-02 | 5.77E-01 | 1.19E-01 |
| New.CleanUp.ReferenceOTU6550   | k__Bacteria;p__Firmicutes;c__Clostridia;o__Clostridiales;f__g__s__                                        | 1.68E-02 | 2.11E-01 | 0.00E+00 |
| New.CleanUp.ReferenceOTU97839  | k__Bacteria;p__Firmicutes;c__Clostridia;o__Clostridiales;f__Lachnospiraceae;g__s__                        | 1.68E-02 | 2.11E-01 | 0.00E+00 |
| 4178726                        | k__Bacteria;p__Firmicutes;c__Clostridia;o__Clostridiales;f__Lachnospiraceae                               | 1.68E-02 | 1.48E+00 | 0.00E+00 |
| New.CleanUp.ReferenceOTU147725 | k__Bacteria;p__Firmicutes;c__Clostridia;o__Clostridiales;f__Lachnospiraceae;g__s__                        | 1.68E-02 | 2.11E-01 | 0.00E+00 |
| New.CleanUp.ReferenceOTU176679 | k__Bacteria;p__Firmicutes;c__Clostridia;o__Clostridiales;f__Lachnospiraceae;g__Blautia;s__producta        | 1.68E-02 | 2.11E-01 | 0.00E+00 |

|                                |                                                                                                                |          |          |          |
|--------------------------------|----------------------------------------------------------------------------------------------------------------|----------|----------|----------|
| 363321                         | k__Bacteria;p__Firmicutes;c__Clostridia;o__Clostridiales;f__Lachnospiraceae;g__Dorea;s__                       | 1.68E-02 | 2.68E-01 | 0.00E+00 |
| New.CleanUp.ReferenceOTU101749 | k__Bacteria;p__Firmicutes;c__Clostridia;o__Clostridiales;f__Ruminococcaceae;g__s__                             | 1.68E-02 | 2.39E-01 | 0.00E+00 |
| 3855938                        | k__Bacteria;p__Firmicutes;c__Erysipelotrichi;o__Erysipelotrichales;f__Erysipelotrichaceae;g__Coprobacillus;s__ | 1.68E-02 | 2.39E-01 | 0.00E+00 |
| New.CleanUp.ReferenceOTU2374   | k__Bacteria;p__Firmicutes;c__Clostridia;o__Clostridiales;f__g__s__                                             | 1.68E-02 | 2.54E-01 | 0.00E+00 |
| New.CleanUp.ReferenceOTU172657 | k__Bacteria;p__Firmicutes;c__Bacilli;o__Bacillales;f__Staphylococcaceae;g__Jeotgalicoccus;s__                  | 1.68E-02 | 3.66E-01 | 0.00E+00 |
| 550807                         | k__Bacteria;p__Firmicutes;c__Clostridia;o__Clostridiales;f__g__s__                                             | 1.68E-02 | 2.68E-01 | 0.00E+00 |
| 553150                         | k__Bacteria;p__Firmicutes;c__Clostridia;o__Clostridiales;f__Lachnospiraceae;g__Coprococcus;s__                 | 1.68E-02 | 2.54E-01 | 0.00E+00 |
| New.CleanUp.ReferenceOTU104805 | k__Bacteria;p__Firmicutes;c__Clostridia;o__Clostridiales;f__Lachnospiraceae;g__Blautia;s__                     | 1.68E-02 | 3.24E-01 | 0.00E+00 |
| New.CleanUp.ReferenceOTU24446  | k__Bacteria;p__Firmicutes;c__Clostridia;o__Clostridiales;f__Lachnospiraceae                                    | 1.68E-02 | 3.24E-01 | 0.00E+00 |
| New.CleanUp.ReferenceOTU119524 | k__Bacteria;p__Firmicutes;c__Clostridia;o__Clostridiales;f__Ruminococcaceae;g__Oscillospira;s__                | 1.68E-02 | 4.51E-01 | 0.00E+00 |
| 190241                         | k__Bacteria;p__Firmicutes;c__Clostridia;o__Clostridiales;f__Lachnospiraceae;g__s__                             | 1.68E-02 | 2.52E+00 | 0.00E+00 |
| 48899                          | k__Bacteria;p__Firmicutes;c__Clostridia;o__Clostridiales;f__g__s__                                             | 1.70E-02 | 2.62E+00 | 3.73E-01 |
| 299875                         | k__Bacteria;p__Firmicutes;c__Clostridia;o__Clostridiales;f__Ruminococcaceae;g__s__                             | 1.72E-02 | 2.82E-02 | 4.93E-01 |
| 302809                         | k__Bacteria;p__Firmicutes;c__Clostridia;o__Clostridiales;f__Ruminococcaceae;g__s__                             | 1.72E-02 | 2.49E+00 | 1.16E+00 |
| 3946926                        | k__Bacteria;p__Firmicutes;c__Bacilli;o__Lactobacillales;f__Lactobacillaceae;g__Lactobacillus;s__               | 1.74E-02 | 1.18E+00 | 1.19E-01 |
| 173245                         | k__Bacteria;p__Firmicutes;c__Clostridia;o__Clostridiales;f__g__s__                                             | 1.77E-02 | 1.07E+00 | 7.46E-02 |
| 290498                         | k__Bacteria;p__Firmicutes;c__Clostridia;o__Clostridiales;f__g__s__                                             | 1.78E-02 | 9.58E-01 | 1.88E+00 |
| New.CleanUp.ReferenceOTU83219  | k__Bacteria;p__Firmicutes;c__Clostridia;o__Clostridiales;f__Ruminococcaceae;g__s__                             | 1.79E-02 | 1.55E-01 | 5.97E-01 |
| New.CleanUp.ReferenceOTU149788 | k__Bacteria;p__Firmicutes;c__Clostridia;o__Clostridiales;f__Christensenellaceae;g__s__                         | 1.79E-02 | 2.82E-02 | 2.84E-01 |
| New.CleanUp.ReferenceOTU160291 | k__Bacteria;p__Spirochaetes;c__Spirochaetes;o__Spirochaetales;f__Spirochaetaceae;g__Treponema;s__              | 1.79E-02 | 2.82E-02 | 2.99E-01 |
| 287875                         | k__Bacteria;p__Firmicutes;c__Clostridia;o__Clostridiales;f__Ruminococcaceae;g__s__                             | 1.80E-02 | 1.41E-02 | 2.99E-01 |
| New.CleanUp.ReferenceOTU94728  | k__Bacteria;p__Firmicutes;c__Clostridia;o__Clostridiales;f__Ruminococcaceae;g__Ruminococcus;s__                | 1.80E-02 | 1.41E-02 | 2.99E-01 |
| New.CleanUp.ReferenceOTU64797  | k__Bacteria;p__Bacteroidetes;c__Bacteroidia;o__Bacteroidales;f__g__s__                                         | 1.80E-02 | 1.41E-02 | 4.63E-01 |
| New.CleanUp.ReferenceOTU49075  | k__Bacteria;p__Firmicutes;c__Clostridia;o__Clostridiales;f__Lachnospiraceae;g__s__                             | 1.80E-02 | 1.83E-01 | 5.67E-01 |
| New.CleanUp.ReferenceOTU125119 | k__Bacteria;p__Bacteroidetes;c__Bacteroidia;o__Bacteroidales;f__g__s__                                         | 1.82E-02 | 1.41E-02 | 2.84E-01 |
| New.CleanUp.ReferenceOTU138962 | k__Bacteria;p__Firmicutes;c__Clostridia;o__Clostridiales;f__Ruminococcaceae;g__s__                             | 1.82E-02 | 1.41E-02 | 2.54E-01 |
| New.ReferenceOTU981            | k__Bacteria;p__Bacteroidetes;c__Bacteroidia;o__Bacteroidales;f__g__s__                                         | 1.82E-02 | 1.41E-02 | 6.57E-01 |
| 270094                         | k__Bacteria;p__Bacteroidetes;c__Bacteroidia;o__Bacteroidales;f__Bacteroidaceae;g__Bacteroides;s__              | 1.82E-02 | 7.89E-01 | 2.24E-01 |
| New.CleanUp.ReferenceOTU94005  | k__Bacteria;p__Planctomycetes;c__Planctomycetia;o__Pirellulales;f__Pirellulaceae;g__s__                        | 1.83E-02 | 4.23E-02 | 6.27E-01 |
| New.ReferenceOTU479            | Unassigned                                                                                                     | 1.83E-02 | 1.41E-02 | 2.24E-01 |
| New.CleanUp.ReferenceOTU67908  | k__Bacteria;p__Firmicutes;c__Clostridia;o__Clostridiales;f__Ruminococcaceae;g__s__                             | 1.83E-02 | 1.41E-02 | 2.54E-01 |
| New.CleanUp.ReferenceOTU92063  | k__Bacteria;p__Tenericutes;c__Mollicutes;o__RF39;f__g__s__                                                     | 1.83E-02 | 1.41E-02 | 2.39E-01 |



|                                |                                                                                                                        |          |          |          |
|--------------------------------|------------------------------------------------------------------------------------------------------------------------|----------|----------|----------|
| New.CleanUp.ReferenceOTU162801 | k__Bacteria;p__Firmicutes;c__Clostridia;o__Clostridiales;f__Ruminococcaceae;g__s__                                     | 1.83E-02 | 1.13E-01 | 5.67E-01 |
| New.ReferenceOTU75             | k__Bacteria;p__Firmicutes;c__Clostridia;o__Clostridiales;f__Christensenellaceae;g__s__                                 | 1.84E-02 | 5.63E-02 | 3.88E-01 |
| New.CleanUp.ReferenceOTU43261  | k__Bacteria;p__Firmicutes;c__Clostridia;o__Clostridiales;f__Christensenellaceae;g__s__                                 | 1.85E-02 | 3.80E-01 | 1.04E-01 |
| New.CleanUp.ReferenceOTU47466  | k__Bacteria;p__Bacteroidetes;c__Bacteroidia;o__Bacteroidales;f__g__s__                                                 | 1.85E-02 | 1.41E-02 | 2.24E-01 |
| 289397                         | k__Bacteria;p__Firmicutes;c__Clostridia;o__Clostridiales;f__Lachnospiraceae;g__Blautia;s__                             | 1.85E-02 | 1.68E+00 | 2.69E-01 |
| New.CleanUp.ReferenceOTU89736  | k__Bacteria;p__Bacteroidetes;c__Bacteroidia;o__Bacteroidales;f__[Paraprevotellaceae];g__CF231;s__                      | 1.85E-02 | 3.38E-01 | 1.07E+00 |
| New.CleanUp.ReferenceOTU102544 | k__Bacteria;p__Firmicutes;c__Clostridia;o__Clostridiales;f__Lachnospiraceae;g__s__                                     | 1.86E-02 | 2.82E-02 | 2.24E-01 |
| 4446238                        | k__Bacteria;p__Firmicutes;c__Clostridia;o__Clostridiales;f__Lachnospiraceae;g__s__                                     | 1.86E-02 | 3.67E+01 | 1.83E+01 |
| New.ReferenceOTU546            | k__Bacteria;p__Firmicutes;c__Clostridia;o__Clostridiales;f__g__s__                                                     | 1.87E-02 | 1.41E-02 | 1.94E-01 |
| 302690                         | k__Bacteria;p__Firmicutes;c__Clostridia;o__Clostridiales;f__Lachnospiraceae                                            | 1.89E-02 | 2.82E-02 | 3.73E-01 |
| New.ReferenceOTU969            | k__Bacteria;p__Firmicutes;c__Clostridia;o__Clostridiales;f__Lachnospiraceae;g__s__                                     | 1.89E-02 | 1.69E-01 | 3.88E-01 |
| 298259                         | k__Bacteria;p__Verrucomicrobia;c__Verruco-5;o__WCHB1-41;f__RFP12;g__s__                                                | 1.91E-02 | 7.04E-02 | 2.99E-01 |
| 340852                         | k__Bacteria;p__Firmicutes;c__Clostridia;o__Clostridiales;f__Lachnospiraceae;g__s__                                     | 1.92E-02 | 5.92E-01 | 1.84E+00 |
| New.CleanUp.ReferenceOTU16959  | k__Bacteria;p__Firmicutes;c__Clostridia;o__Clostridiales;f__Ruminococcaceae;g__s__                                     | 1.92E-02 | 1.27E-01 | 7.31E-01 |
| New.CleanUp.ReferenceOTU144653 | k__Bacteria;p__Firmicutes;c__Clostridia;o__Clostridiales;f__Lachnospiraceae;g__s__                                     | 1.93E-02 | 3.80E-01 | 1.39E+00 |
| New.CleanUp.ReferenceOTU60855  | k__Bacteria;p__Firmicutes;c__Clostridia;o__Clostridiales;f__Christensenellaceae;g__s__                                 | 1.93E-02 | 4.23E-02 | 3.58E-01 |
| 113542                         | k__Bacteria;p__Proteobacteria;c__Deltaproteobacteria;o__Desulfovibrionales;f__Desulfovibrionaceae;g__Desulfovibrio;s__ | 1.94E-02 | 3.85E+00 | 1.64E+00 |
| 303897                         | k__Bacteria;p__Firmicutes;c__Clostridia;o__Clostridiales;f__Lachnospiraceae;g__Blautia;s__                             | 1.95E-02 | 1.55E-01 | 7.46E-01 |
| New.CleanUp.ReferenceOTU160425 | k__Bacteria;p__Bacteroidetes;c__Bacteroidia;o__Bacteroidales;f__[Paraprevotellaceae];g__s__                            | 1.95E-02 | 2.11E-01 | 1.19E+00 |
| 291527                         | k__Bacteria;p__Verrucomicrobia;c__Verruco-5;o__WCHB1-41;f__RFP12;g__s__                                                | 1.96E-02 | 2.11E-01 | 8.66E-01 |
| 326486                         | k__Bacteria;p__Firmicutes;c__Clostridia;o__Clostridiales;f__Ruminococcaceae;g__s__                                     | 1.98E-02 | 1.83E-01 | 8.06E-01 |
| 324857                         | k__Bacteria;p__Firmicutes;c__Clostridia;o__Clostridiales;f__[Mogibacteriaceae];g__s__                                  | 1.99E-02 | 3.52E-01 | 9.25E-01 |
| 342716                         | k__Bacteria;p__Firmicutes;c__Clostridia;o__Clostridiales;f__Lachnospiraceae;g__s__                                     | 1.99E-02 | 4.96E+00 | 7.37E+00 |
| New.ReferenceOTU606            | k__Bacteria;p__Firmicutes;c__Clostridia;o__Clostridiales;f__[Mogibacteriaceae];g__s__                                  | 2.00E-02 | 4.23E-02 | 2.99E-01 |
| New.CleanUp.ReferenceOTU63798  | k__Bacteria;p__Bacteroidetes;c__Bacteroidia;o__Bacteroidales;f__g__s__                                                 | 2.00E-02 | 3.38E-01 | 1.03E+00 |
| 562583                         | k__Bacteria;p__Firmicutes;c__Clostridia;o__Clostridiales;f__Ruminococcaceae;g__Ruminococcus;s__                        | 2.01E-02 | 8.45E-02 | 1.06E+00 |
| 4373873                        | k__Bacteria;p__Firmicutes;c__Clostridia;o__Clostridiales;f__Lachnospiraceae;g__Dorea;s__                               | 2.03E-02 | 3.52E-01 | 2.99E-02 |
| 317315                         | k__Bacteria;p__Firmicutes;c__Clostridia;o__Clostridiales;f__g__s__                                                     | 2.04E-02 | 8.15E+00 | 1.19E+00 |
| New.ReferenceOTU774            | k__Bacteria;p__Bacteroidetes;c__Bacteroidia;o__Bacteroidales;f__Bacteroidaceae;g__Bacteroides;s__                      | 2.05E-02 | 2.96E-01 | 1.49E-02 |
| New.CleanUp.ReferenceOTU147585 | k__Bacteria;p__Firmicutes;c__Clostridia;o__Clostridiales;f__g__s__                                                     | 2.07E-02 | 5.63E-02 | 3.88E-01 |
| 302685                         | k__Bacteria;p__Firmicutes;c__Clostridia;o__Clostridiales;f__g__s__                                                     | 2.07E-02 | 4.23E-02 | 4.18E-01 |
| 288651                         | k__Bacteria;p__Firmicutes;c__Clostridia;o__Clostridiales;f__Ruminococcaceae;g__s__                                     | 2.07E-02 | 3.24E-01 | 1.49E-02 |

|                                |                                                                                                                       |          |          |          |
|--------------------------------|-----------------------------------------------------------------------------------------------------------------------|----------|----------|----------|
| 4338745                        | k__Bacteria;p__Firmicutes;c__Clostridia;o__Clostridiales;f__Veillonellaceae;g__s__                                    | 2.07E-02 | 3.66E-01 | 1.49E-02 |
| 4295063                        | k__Bacteria;p__Firmicutes;c__Clostridia;o__Clostridiales;f__[Mogibacteriaceae];g__s__                                 | 2.07E-02 | 4.08E-01 | 1.49E-02 |
| 533624                         | k__Bacteria;p__Firmicutes;c__Erysipelotrichi;o__Erysipelotrichales;f__Erysipelotrichaceae;g__Catenibacterium;s__      | 2.07E-02 | 7.32E-01 | 2.99E-02 |
| 182167                         | k__Bacteria;p__Firmicutes;c__Clostridia;o__Clostridiales;f__Ruminococcaceae;g__s__                                    | 2.07E-02 | 7.46E-01 | 2.99E-02 |
| 589658                         | k__Bacteria;p__Firmicutes;c__Clostridia;o__Clostridiales;f__g__s__                                                    | 2.07E-02 | 3.11E+00 | 2.24E-01 |
| New.ReferenceOTU834            | k__Bacteria;p__Firmicutes;c__Clostridia;o__Clostridiales;f__Ruminococcaceae;g__s__                                    | 2.08E-02 | 1.15E+00 | 2.09E+00 |
| 346914                         | k__Bacteria;p__Bacteroidetes;c__Bacteroidia;o__Bacteroidales;f__g__s__                                                | 2.08E-02 | 3.24E-01 | 8.81E-01 |
| New.ReferenceOTU97             | k__Bacteria;p__Firmicutes;c__Clostridia;o__Clostridiales;f__Ruminococcaceae;g__s__                                    | 2.08E-02 | 4.65E-01 | 1.49E-02 |
| New.CleanUp.ReferenceOTU28336  | k__Bacteria;p__Firmicutes;c__Clostridia;o__Clostridiales;f__Lachnospiraceae;g__Dorea;s__                              | 2.08E-02 | 2.54E-01 | 1.49E-02 |
| New.CleanUp.ReferenceOTU106366 | k__Bacteria;p__Firmicutes;c__Clostridia;o__Clostridiales;f__Ruminococcaceae;g__s__                                    | 2.08E-02 | 2.82E-01 | 1.49E-02 |
| New.CleanUp.ReferenceOTU134024 | k__Bacteria;p__Firmicutes;c__Clostridia;o__Clostridiales;f__Lachnospiraceae;g__s__                                    | 2.08E-02 | 2.54E-01 | 1.49E-02 |
| New.CleanUp.ReferenceOTU176836 | k__Bacteria;p__Firmicutes;c__Clostridia;o__Clostridiales;f__Lachnospiraceae;g__Dorea;s__                              | 2.08E-02 | 3.10E-01 | 1.49E-02 |
| New.ReferenceOTU744            | k__Bacteria;p__Firmicutes;c__Clostridia;o__Clostridiales;f__Lachnospiraceae;g__Dorea;s__                              | 2.10E-02 | 2.39E-01 | 1.49E-02 |
| New.CleanUp.ReferenceOTU58691  | k__Bacteria;p__Firmicutes;c__Clostridia;o__Clostridiales;f__Lachnospiraceae;g__Blautia;s__producta                    | 2.10E-02 | 2.39E-01 | 1.49E-02 |
| 213784                         | k__Bacteria;p__Firmicutes;c__Clostridia;o__Clostridiales;f__g__s__                                                    | 2.10E-02 | 3.66E-01 | 1.49E-02 |
| 4311620                        | k__Bacteria;p__Firmicutes;c__Clostridia;o__Clostridiales;f__EtOH8;g__s__                                              | 2.12E-02 | 8.87E-01 | 1.19E-01 |
| 302001                         | k__Bacteria;p__Firmicutes;c__Clostridia;o__Clostridiales;f__Veillonellaceae;g__Phascolarctobacterium;s__              | 2.12E-02 | 3.38E-01 | 1.37E+00 |
| 344639                         | k__Bacteria;p__Firmicutes;c__Clostridia;o__Clostridiales;f__g__s__                                                    | 2.12E-02 | 1.18E+00 | 1.19E-01 |
| 30587                          | k__Bacteria;p__Firmicutes;c__Clostridia;o__Clostridiales;f__g__s__                                                    | 2.12E-02 | 2.25E-01 | 1.49E-02 |
| 179572                         | k__Bacteria;p__Firmicutes;c__Clostridia;o__Clostridiales;f__Ruminococcaceae;g__Ruminococcus;s__                       | 2.12E-02 | 2.39E-01 | 1.49E-02 |
| 106335                         | k__Bacteria;p__Firmicutes;c__Clostridia;o__Clostridiales;f__Dehalobacteriaceae;g__s__                                 | 2.12E-02 | 1.45E+01 | 1.78E+01 |
| 185597                         | k__Bacteria;p__Firmicutes;c__Clostridia;o__Clostridiales;f__Ruminococcaceae;g__s__                                    | 2.13E-02 | 5.63E-01 | 1.19E-01 |
| 4438090                        | k__Bacteria;p__Firmicutes;c__Clostridia;o__Clostridiales;f__Lachnospiraceae                                           | 2.14E-02 | 2.96E-01 | 2.99E-02 |
| New.CleanUp.ReferenceOTU30930  | k__Bacteria;p__Firmicutes;c__Clostridia;o__Clostridiales;f__g__s__                                                    | 2.15E-02 | 1.83E-01 | 9.70E-01 |
| New.CleanUp.ReferenceOTU170209 | k__Bacteria;p__Firmicutes;c__Clostridia;o__Clostridiales;f__Ruminococcaceae;g__s__                                    | 2.15E-02 | 1.27E-01 | 4.78E-01 |
| New.ReferenceOTU491            | k__Bacteria;p__Firmicutes;c__Clostridia;o__Clostridiales;f__Ruminococcaceae;g__s__                                    | 2.16E-02 | 1.97E-01 | 6.72E-01 |
| New.CleanUp.ReferenceOTU35651  | k__Bacteria;p__Firmicutes;c__Bacilli;o__Lactobacillales;f__Lactobacillaceae;g__Lactobacillus;s__                      | 2.19E-02 | 2.68E-01 | 2.99E-02 |
| 292779                         | k__Bacteria;p__Bacteroidetes;c__Bacteroidia;o__Bacteroidales;f__[Paraprevotellaceae];g__[Prevotella];s__              | 2.19E-02 | 2.25E-01 | 2.49E+00 |
| 784040                         | k__Bacteria;p__Firmicutes;c__Clostridia;o__Clostridiales;f__g__s__                                                    | 2.19E-02 | 7.32E-01 | 2.63E+00 |
| 539506                         | k__Bacteria;p__Firmicutes;c__Clostridia;o__Clostridiales;f__Ruminococcaceae;g__s__                                    | 2.19E-02 | 1.97E-01 | 4.03E-01 |
| 4354103                        | k__Bacteria;p__Firmicutes;c__Bacilli;o__Lactobacillales;f__Lactobacillaceae;g__Lactobacillus;s__                      | 2.19E-02 | 1.43E+01 | 7.30E+00 |
| 842598                         | k__Archaea;p__Euryarchaeota;c__Methanobacteria;o__Methanobacteriales;f__Methanobacteriaceae;g__Methanobrevibacter;s__ | 2.21E-02 | 3.37E+01 | 8.16E+01 |

|                                |                                                                                                         |          |          |          |
|--------------------------------|---------------------------------------------------------------------------------------------------------|----------|----------|----------|
| New.CleanUp.ReferenceOTU30250  | k__Bacteria;p__Firmicutes;c__Clostridia;o__Clostridiales;f__Lachnospiraceae                             | 2.22E-02 | 1.55E-01 | 4.48E-01 |
| New.CleanUp.ReferenceOTU179076 | k__Bacteria;p__Firmicutes;c__Clostridia;o__Clostridiales;f__Ruminococcaceae;g__s__                      | 2.22E-02 | 7.04E-02 | 4.33E-01 |
| New.CleanUp.ReferenceOTU119842 | k__Bacteria;p__Firmicutes;c__Clostridia;o__Clostridiales;f__Lachnospiraceae;g__[Ruminococcus];s__gnavus | 2.25E-02 | 6.20E-01 | 8.96E-02 |
| New.ReferenceOTU482            | k__Bacteria;p__Spirochaetes;c__Spirochaetes;o__Spirochaetales;f__Spirochaetaceae;g__Treponema;s__       | 2.27E-02 | 7.18E-01 | 2.72E+00 |
| New.CleanUp.ReferenceOTU119509 | k__Bacteria;p__Firmicutes;c__Clostridia;o__Clostridiales;f__Lachnospiraceae;g__s__                      | 2.28E-02 | 6.90E-01 | 1.72E+00 |
| 196905                         | k__Bacteria;p__Firmicutes;c__Clostridia;o__Clostridiales;f__Ruminococcaceae;g__s__                      | 2.29E-02 | 2.58E+00 | 6.12E-01 |
| New.ReferenceOTU952            | k__Bacteria;p__Firmicutes;c__Bacilli;o__Lactobacillales;f__Lactobacillaceae;g__Lactobacillus;s__        | 2.29E-02 | 3.80E-01 | 5.97E-02 |
| 105411                         | k__Bacteria;p__Firmicutes;c__Clostridia;o__Clostridiales;f__Lachnospiraceae;g__Dorea;s__                | 2.29E-02 | 5.39E+00 | 5.34E+00 |
| New.CleanUp.ReferenceOTU123174 | k__Bacteria;p__Firmicutes;c__Clostridia;o__Clostridiales;f__Ruminococcaceae;g__s__                      | 2.29E-02 | 5.63E-02 | 2.84E-01 |
| 305924                         | k__Bacteria;p__Firmicutes;c__Clostridia;o__Clostridiales;f__Lachnospiraceae;g__s__                      | 2.30E-02 | 2.68E-01 | 7.61E-01 |
| New.CleanUp.ReferenceOTU127332 | Unassigned                                                                                              | 2.30E-02 | 8.45E-02 | 4.33E-01 |
| 194670                         | k__Bacteria;p__Bacteroidetes;c__Bacteroidia;o__Bacteroidales;f__Bacteroidaceae;g__Bacteroides;s__       | 2.30E-02 | 3.66E-01 | 2.99E-02 |
| New.ReferenceOTU93             | k__Bacteria;p__Firmicutes;c__Clostridia;o__Clostridiales;f__Lachnospiraceae                             | 2.30E-02 | 4.23E-01 | 1.03E+00 |
| 593686                         | k__Bacteria;p__Firmicutes;c__Clostridia;o__Clostridiales;f__Lachnospiraceae;g__Coprococcus;s__          | 2.31E-02 | 1.55E-01 | 4.93E-01 |
| 176980                         | k__Bacteria;p__Firmicutes;c__Clostridia;o__Clostridiales;f__Lachnospiraceae;g__Dorea;s__                | 2.31E-02 | 6.76E-01 | 1.49E-01 |
| 4468384                        | k__Bacteria;p__Firmicutes;c__Clostridia;o__Clostridiales;f__Lachnospiraceae;g__Blautia;s__              | 2.32E-02 | 4.79E-01 | 5.97E-02 |
| New.CleanUp.ReferenceOTU146423 | k__Bacteria;p__Firmicutes;c__Clostridia;o__Clostridiales;f__Clostridiaceae;g__Clostridium;s__           | 2.35E-02 | 5.92E-01 | 6.72E-01 |
| 341885                         | k__Bacteria;p__Firmicutes;c__Clostridia;o__Clostridiales;f__Christensenellaceae;g__s__                  | 2.35E-02 | 3.80E-01 | 1.19E-01 |
| New.CleanUp.ReferenceOTU146550 | k__Bacteria;p__Firmicutes;c__Clostridia;o__Clostridiales;f__Ruminococcaceae                             | 2.35E-02 | 2.96E-01 | 2.99E-02 |
| 147678                         | k__Bacteria;p__Firmicutes;c__Clostridia;o__Clostridiales;f__g__s__                                      | 2.35E-02 | 1.37E+00 | 7.46E-02 |
| 4383953                        | k__Bacteria;p__Firmicutes;c__Clostridia;o__Clostridiales;f__Clostridiaceae;g__s__                       | 2.35E-02 | 1.69E-01 | 8.94E+00 |
| 653954                         | k__Bacteria;p__Firmicutes;c__Clostridia;o__Clostridiales;f__Lachnospiraceae;g__Dorea;s__                | 2.36E-02 | 8.31E-01 | 2.31E+00 |
| 302943                         | k__Bacteria;p__Firmicutes;c__Clostridia;o__Clostridiales;f__g__s__                                      | 2.39E-02 | 1.83E-01 | 8.66E-01 |
| 3152469                        | k__Bacteria;p__Firmicutes;c__Clostridia;o__Clostridiales                                                | 2.41E-02 | 2.31E+00 | 1.07E+00 |
| 4354042                        | k__Bacteria;p__Bacteroidetes;c__Bacteroidia;o__Bacteroidales;f__Bacteroidaceae;g__Bacteroides;s__       | 2.43E-02 | 4.65E-01 | 5.97E-02 |
| New.ReferenceOTU747            | k__Bacteria;p__Verrucomicrobia;c__Verruco-5;o__WCHB1-41;f__RFP12;g__s__                                 | 2.44E-02 | 8.45E-02 | 9.70E-01 |
| 4381553                        | k__Bacteria;p__Bacteroidetes;c__Bacteroidia;o__Bacteroidales;f__Bacteroidaceae;g__Bacteroides;s__       | 2.45E-02 | 1.11E+00 | 1.94E-01 |
| New.CleanUp.ReferenceOTU48497  | k__Bacteria;p__Firmicutes;c__Clostridia;o__Clostridiales;f__Ruminococcaceae;g__s__                      | 2.47E-02 | 4.79E-01 | 8.21E-01 |
| 316144                         | k__Bacteria;p__Firmicutes;c__Clostridia;o__Clostridiales;f__Lachnospiraceae;g__Blautia;s__              | 2.47E-02 | 4.23E-02 | 4.48E-01 |
| New.CleanUp.ReferenceOTU12089  | k__Bacteria;p__Firmicutes;c__Clostridia;o__Clostridiales;f__g__s__                                      | 2.47E-02 | 1.55E-01 | 6.27E-01 |
| 263036                         | k__Bacteria;p__Firmicutes;c__Clostridia;o__Clostridiales;f__Clostridiaceae;g__Clostridium;s__           | 2.49E-02 | 3.24E-01 | 2.15E+00 |
| 350337                         | k__Bacteria;p__Firmicutes;c__Clostridia;o__Clostridiales;f__g__s__                                      | 2.49E-02 | 7.04E-02 | 4.48E-01 |

|                                |                                                                                                                               |          |          |          |
|--------------------------------|-------------------------------------------------------------------------------------------------------------------------------|----------|----------|----------|
| 161423                         | k__Bacteria;p__Bacteroidetes;c__Bacteroidia;o__Bacteroidales;f__Bacteroidaceae;g__Bacteroides;s__                             | 2.51E-02 | 1.52E+00 | 5.52E-01 |
| 231510                         | k__Bacteria;p__Actinobacteria;c__Coriobacteriia;o__Coriobacteriales;f__Coriobacteriaceae;g__Adlercreutzia;s__                 | 2.55E-02 | 2.25E-01 | 6.12E-01 |
| New.CleanUp.ReferenceOTU107484 | k__Bacteria;p__Spirochaetes;c__Spirochaetes;o__Spirochaetales;f__Spirochaetaceae;g__Treponema;s__                             | 2.55E-02 | 4.23E-02 | 3.43E-01 |
| 578754                         | k__Bacteria;p__Firmicutes;c__Clostridia;o__Clostridiales;f__g__s__                                                            | 2.55E-02 | 2.11E-01 | 8.96E-02 |
| New.CleanUp.ReferenceOTU50397  | k__Bacteria;p__Firmicutes;c__Clostridia;o__Clostridiales;f__g__s__                                                            | 2.57E-02 | 3.10E-01 | 1.00E+00 |
| 178996                         | k__Bacteria;p__Firmicutes;c__Clostridia;o__Clostridiales;f__g__s__                                                            | 2.58E-02 | 8.45E-02 | 6.42E-01 |
| 4473664                        | k__Bacteria;p__Firmicutes;c__Clostridia;o__Clostridiales;f__Peptostreptococcaeae;g__Peptostreptococcus;s__anaerobius          | 2.66E-02 | 8.45E-02 | 1.18E+00 |
| 299673                         | k__Bacteria;p__Firmicutes;c__Clostridia;o__Clostridiales;f__g__s__                                                            | 2.67E-02 | 1.48E+02 | 5.21E+01 |
| 4387250                        | k__Bacteria;p__Bacteroidetes;c__Bacteroidia;o__Bacteroidales;f__Bacteroidaceae;g__Bacteroides;s__                             | 2.67E-02 | 6.06E-01 | 2.39E-01 |
| New.ReferenceOTU21             | k__Bacteria;p__Verrucomicrobia;c__Verrucomicrobiae;o__Verrucomicrobiales;f__Verrucomicrobiaceae;g__Akkermansia;s__muciniphila | 2.69E-02 | 1.75E+00 | 3.88E-01 |
| 301584                         | k__Bacteria;p__Fibrobacteres;c__Fibrobacteria;o__Fibrobacterales;f__Fibrobacteraceae;g__Fibrobacter;s__succinogenes           | 2.69E-02 | 9.86E-02 | 8.51E-01 |
| 303666                         | k__Bacteria;p__Firmicutes;c__Clostridia;o__Clostridiales;f__Ruminococcaceae;g__s__                                            | 2.72E-02 | 0.00E+00 | 1.34E-01 |
| New.CleanUp.ReferenceOTU166823 | k__Bacteria;p__Firmicutes;c__Clostridia;o__Clostridiales;f__Lachnospiraceae;g__s__                                            | 2.72E-02 | 0.00E+00 | 1.34E-01 |
| 366376                         | k__Bacteria;p__Firmicutes;c__Clostridia;o__Clostridiales;f__Ruminococcaceae;g__s__                                            | 2.72E-02 | 5.21E-01 | 1.34E-01 |
| New.ReferenceOTU976            | k__Bacteria;p__Tenericutes;c__RF3;o__ML615J-28;f__g__s__                                                                      | 2.72E-02 | 0.00E+00 | 2.39E-01 |
| New.CleanUp.ReferenceOTU5619   | k__Bacteria;p__Bacteroidetes;c__Bacteroidia;o__Bacteroidales;f__g__s__                                                        | 2.72E-02 | 0.00E+00 | 1.49E-01 |
| New.CleanUp.ReferenceOTU11026  | k__Bacteria;p__Verrucomicrobia;c__Verrucomicrobiae;o__Verrucomicrobiales;f__Verrucomicrobiaceae;g__Akkermansia;s__            | 2.72E-02 | 0.00E+00 | 1.49E-01 |
| New.CleanUp.ReferenceOTU132897 | k__Bacteria;p__Firmicutes;c__Clostridia;o__Clostridiales;f__Lachnospiraceae;g__s__                                            | 2.72E-02 | 0.00E+00 | 1.64E-01 |
| New.ReferenceOTU62             | k__Bacteria;p__Firmicutes;c__Clostridia;o__Clostridiales;f__Lachnospiraceae;g__s__                                            | 2.72E-02 | 0.00E+00 | 1.64E-01 |
| New.CleanUp.ReferenceOTU112927 | k__Bacteria;p__Fibrobacteres;c__Fibrobacteria;o__Fibrobacterales;f__Fibrobacteraceae;g__Fibrobacter;s__succinogenes           | 2.72E-02 | 0.00E+00 | 2.09E-01 |
| New.CleanUp.ReferenceOTU54532  | k__Bacteria;p__Firmicutes;c__Clostridia;o__Clostridiales;f__g__s__                                                            | 2.72E-02 | 1.55E-01 | 3.28E-01 |
| 180881                         | k__Bacteria;p__Firmicutes;c__Clostridia;o__Clostridiales;f__g__s__                                                            | 2.72E-02 | 0.00E+00 | 2.69E-01 |
| New.CleanUp.ReferenceOTU39344  | Unassigned                                                                                                                    | 2.72E-02 | 0.00E+00 | 2.24E-01 |
| 213671                         | k__Bacteria;p__Bacteroidetes;c__Bacteroidia;o__Bacteroidales;f__Rikenellaceae;g__s__                                          | 2.72E-02 | 1.00E+00 | 7.46E-02 |
| New.CleanUp.ReferenceOTU151697 | k__Bacteria;p__Spirochaetes;c__Spirochaetes;o__Spirochaetales;f__Spirochaetaceae;g__Treponema;s__                             | 2.72E-02 | 0.00E+00 | 2.09E-01 |
| 296649                         | k__Bacteria;p__Firmicutes;c__Clostridia;o__Clostridiales;f__Ruminococcaceae;g__s__                                            | 2.72E-02 | 0.00E+00 | 2.09E-01 |
| New.CleanUp.ReferenceOTU111775 | k__Bacteria;p__Firmicutes;c__Clostridia;o__Clostridiales;f__g__s__                                                            | 2.72E-02 | 0.00E+00 | 2.84E-01 |
| New.CleanUp.ReferenceOTU108477 | k__Bacteria;p__Spirochaetes;c__Spirochaetes;o__Spirochaetales;f__Spirochaetaceae;g__Treponema;s__                             | 2.72E-02 | 0.00E+00 | 5.37E-01 |
| 193364                         | k__Bacteria;p__Firmicutes;c__Clostridia;o__Clostridiales;f__Lachnospiraceae;g__Dorea;s__                                      | 2.73E-02 | 1.55E-01 | 0.00E+00 |
| 215231                         | k__Bacteria;p__Firmicutes;c__Clostridia;o__Clostridiales;f__Ruminococcaceae;g__s__                                            | 2.73E-02 | 1.69E-01 | 0.00E+00 |
| 189860                         | k__Bacteria;p__Firmicutes;c__Clostridia;o__Clostridiales;f__Lachnospiraceae;g__Roseburia;s__                                  | 2.73E-02 | 7.46E-01 | 0.00E+00 |
| 294169                         | k__Bacteria;p__Firmicutes;c__Clostridia;o__Clostridiales;f__Ruminococcaceae;g__s__                                            | 2.73E-02 | 1.69E-01 | 0.00E+00 |

|                                |                                                                                                                        |          |          |          |
|--------------------------------|------------------------------------------------------------------------------------------------------------------------|----------|----------|----------|
| 574038                         | k__Bacteria;p__Firmicutes;c__Clostridia;o__Clostridiales;f__g__s__                                                     | 2.73E-02 | 1.69E-01 | 0.00E+00 |
| New.CleanUp.ReferenceOTU15496  | k__Bacteria;p__Proteobacteria;c__Epsilonproteobacteria;o__Campylobacterales;f__Campylobacteraceae;g__Campylobacter;s__ | 2.73E-02 | 1.69E-01 | 0.00E+00 |
| 291045                         | k__Bacteria;p__Firmicutes;c__Clostridia;o__Clostridiales;f__Ruminococcaceae;g__s__                                     | 2.73E-02 | 5.21E-01 | 0.00E+00 |
| New.CleanUp.ReferenceOTU105519 | k__Bacteria;p__Firmicutes;c__Clostridia;o__Clostridiales                                                               | 2.73E-02 | 1.97E-01 | 0.00E+00 |
| 181291                         | k__Bacteria;p__Firmicutes;c__Clostridia;o__Clostridiales;f__Lachnospiraceae                                            | 2.73E-02 | 1.83E-01 | 0.00E+00 |
| 1105211                        | k__Bacteria;p__Firmicutes;c__Clostridia;o__Clostridiales;f__Lachnospiraceae                                            | 2.73E-02 | 2.11E-01 | 0.00E+00 |
| New.CleanUp.ReferenceOTU115020 | k__Bacteria;p__Firmicutes;c__Erysipelotrichi;o__Erysipelotrichales;f__Erysipelotrichaceae;g__s__                       | 2.73E-02 | 2.11E-01 | 0.00E+00 |
| 355424                         | k__Bacteria;p__Firmicutes;c__Clostridia;o__Clostridiales;f__Lachnospiraceae;g__s__                                     | 2.73E-02 | 2.11E-01 | 0.00E+00 |
| New.CleanUp.ReferenceOTU75959  | k__Bacteria;p__Firmicutes;c__Clostridia;o__Clostridiales;f__Ruminococcaceae;g__Ruminococcus;s__                        | 2.73E-02 | 3.52E-01 | 0.00E+00 |
| New.CleanUp.ReferenceOTU112122 | k__Bacteria;p__Firmicutes;c__Clostridia;o__Clostridiales;f__Lachnospiraceae;g__Blautia;s__                             | 2.73E-02 | 2.11E-01 | 0.00E+00 |
| 4021516                        | k__Bacteria;p__Firmicutes;c__Clostridia;o__Clostridiales;f__Peptococcaceae;g__s__                                      | 2.73E-02 | 3.10E-01 | 0.00E+00 |
| New.CleanUp.ReferenceOTU14221  | k__Bacteria;p__Firmicutes;c__Clostridia;o__Clostridiales;f__g__s__                                                     | 2.73E-02 | 2.68E-01 | 0.00E+00 |
| 4427459                        | k__Bacteria;p__Firmicutes;c__Clostridia;o__Clostridiales;f__Ruminococcaceae;g__Ruminococcus;s__                        | 2.73E-02 | 6.20E-01 | 0.00E+00 |
| New.CleanUp.ReferenceOTU133213 | k__Bacteria;p__Firmicutes;c__Clostridia;o__Clostridiales;f__Lachnospiraceae;g__s__                                     | 2.73E-02 | 6.48E-01 | 0.00E+00 |
| New.CleanUp.ReferenceOTU105326 | k__Bacteria;p__Firmicutes;c__Clostridia;o__Clostridiales;f__Lachnospiraceae;g__Blautia;s__                             | 2.73E-02 | 2.68E-01 | 0.00E+00 |
| 182656                         | k__Bacteria;p__Firmicutes;c__Clostridia;o__Clostridiales;f__g__s__                                                     | 2.73E-02 | 3.10E-01 | 0.00E+00 |
| New.CleanUp.ReferenceOTU63362  | k__Bacteria;p__Firmicutes;c__Clostridia;o__Clostridiales                                                               | 2.73E-02 | 4.37E-01 | 0.00E+00 |
| 136518                         | k__Bacteria;p__Firmicutes;c__Clostridia;o__Clostridiales;f__Lachnospiraceae;g__Epulopiscium;s__                        | 2.73E-02 | 5.07E-01 | 0.00E+00 |
| New.ReferenceOTU54             | k__Bacteria;p__Bacteroidetes;c__Bacteroidia;o__Bacteroidales;f__g__s__                                                 | 2.73E-02 | 2.82E-02 | 8.21E-01 |
| 331156                         | k__Bacteria;p__Firmicutes;c__Clostridia;o__Clostridiales;f__g__s__                                                     | 2.73E-02 | 7.32E-01 | 8.81E-01 |
| 174443                         | k__Bacteria;p__Firmicutes;c__Clostridia;o__Clostridiales;f__Ruminococcaceae;g__s__                                     | 2.75E-02 | 7.46E-01 | 1.19E-01 |
| New.CleanUp.ReferenceOTU161235 | Unassigned                                                                                                             | 2.78E-02 | 3.52E-01 | 1.22E+00 |
| 287506                         | k__Bacteria;p__Firmicutes;c__Clostridia;o__Clostridiales;f__g__s__                                                     | 2.80E-02 | 2.82E-02 | 5.52E-01 |
| 813944                         | k__Bacteria;p__Firmicutes;c__Bacilli;o__Lactobacillales;f__Lactobacillaceae;g__Lactobacillus;s__                       | 2.80E-02 | 1.34E+00 | 3.88E-01 |
| 356061                         | k__Bacteria;p__Firmicutes;c__Clostridia;o__Clostridiales;f__Lachnospiraceae;g__s__                                     | 2.81E-02 | 5.63E-02 | 7.01E-01 |
| 307204                         | k__Bacteria;p__Firmicutes;c__Clostridia;o__Clostridiales;f__Clostridiaceae;g__Clostridium;s__                          | 2.82E-02 | 9.15E-01 | 1.58E+00 |
| New.CleanUp.ReferenceOTU90354  | k__Bacteria;p__Firmicutes;c__Clostridia;o__Clostridiales;f__Christensenellaceae;g__s__                                 | 2.84E-02 | 5.63E-02 | 5.52E-01 |
| New.CleanUp.ReferenceOTU45506  | k__Bacteria;p__Spirochaetes;c__Spirochaetes;o__Spirochaetales;f__Spirochaetaceae;g__Treponema;s__                      | 2.86E-02 | 2.82E-02 | 3.28E-01 |
| 355959                         | k__Bacteria;p__Firmicutes;c__Clostridia;o__Clostridiales;f__Ruminococcaceae;g__s__                                     | 2.87E-02 | 8.45E-02 | 3.88E-01 |
| 324888                         | k__Bacteria;p__Firmicutes;c__Bacilli;o__Lactobacillales;f__Lactobacillaceae;g__Lactobacillus;s__                       | 2.87E-02 | 6.90E-01 | 2.84E-01 |
| 302287                         | k__Bacteria;p__Firmicutes;c__Clostridia;o__Clostridiales;f__Ruminococcaceae;g__s__                                     | 2.88E-02 | 1.83E-01 | 6.27E-01 |
| New.ReferenceOTU483            | k__Bacteria;p__Firmicutes;c__Clostridia;o__Clostridiales;f__g__s__                                                     | 2.89E-02 | 5.49E-01 | 9.85E-01 |

|                                    |                                                                                                              |          |          |          |
|------------------------------------|--------------------------------------------------------------------------------------------------------------|----------|----------|----------|
| 4363552                            | k__Bacteria;p__Firmicutes;c__Clostridia;o__Clostridiales;f__Lachnospiraceae;g__<br>;s__                      | 2.90E-02 | 5.77E-01 | 7.46E-02 |
| 301587                             | k__Bacteria;p__Spirochaetes;c__Spirochaetes;o__Spirochaetales;f__Spirochaet<br>aceae;g__Treponema;s__        | 2.93E-02 | 2.82E-02 | 3.73E-01 |
| New.ReferenceOTU4<br>29            | k__Bacteria;p__Bacteroidetes;c__Bacteroidia;o__Bacteroidales;f__g__s__                                       | 2.93E-02 | 8.45E-01 | 2.10E+00 |
| 302090                             | k__Bacteria;p__Firmicutes;c__Clostridia;o__Clostridiales;f__Lachnospiraceae;g__<br>Blautia;s__               | 2.96E-02 | 8.45E-01 | 2.69E-01 |
| New.CleanUp.Referen<br>ceOTU11340  | Unassigned                                                                                                   | 3.00E-02 | 2.82E-02 | 3.43E-01 |
| New.CleanUp.Referen<br>ceOTU165491 | k__Bacteria;p__Firmicutes;c__Erysipelotrichi;o__Erysipelotrichales;f__Erysipelot<br>richaceae;g__p-75-a5;s__ | 3.00E-02 | 2.82E-01 | 7.76E-01 |
| 175751                             | k__Bacteria;p__Firmicutes;c__Clostridia;o__Clostridiales;f__Lachnospiraceae;g__<br>;s__                      | 3.00E-02 | 6.83E+00 | 1.64E+00 |
| New.ReferenceOTU3<br>88            | k__Bacteria;p__Bacteroidetes;c__Bacteroidia;o__Bacteroidales;f__S24-<br>7;g__s__                             | 3.01E-02 | 1.41E-02 | 9.40E-01 |
| 4298137                            | k__Bacteria;p__Firmicutes;c__Clostridia;o__Clostridiales;f__Christensenellaceae<br>;g__s__                   | 3.02E-02 | 8.87E-01 | 2.54E-01 |
| 15432                              | k__Bacteria;p__Firmicutes;c__Bacilli;o__Lactobacillales;f__Streptococcaceae;g__<br>Streptococcus;s__         | 3.05E-02 | 1.41E-02 | 3.13E-01 |
| New.CleanUp.Referen<br>ceOTU30741  | k__Bacteria;p__Firmicutes;c__Clostridia;o__Clostridiales;f__Ruminococcaceae;g__<br>;s__                      | 3.06E-02 | 2.82E-02 | 2.54E-01 |
| New.CleanUp.Referen<br>ceOTU102811 | k__Bacteria;p__Firmicutes;c__Clostridia;o__Clostridiales;f__g__s__                                           | 3.08E-02 | 5.63E-02 | 3.13E-01 |
| 288682                             | k__Bacteria;p__Firmicutes;c__Clostridia;o__Clostridiales;f__Lachnospiraceae;g__<br>Blautia;s__               | 3.08E-02 | 1.41E-02 | 3.28E-01 |
| New.CleanUp.Referen<br>ceOTU125847 | k__Bacteria;p__Spirochaetes;c__MVP-15;o__PL-11B10;f__g__s__                                                  | 3.08E-02 | 1.41E-02 | 4.48E-01 |
| New.CleanUp.Referen<br>ceOTU326    | k__Bacteria;p__Bacteroidetes;c__Bacteroidia;o__Bacteroidales;f__[Paraprevote<br>llaceae];g__YRC22;s__        | 3.08E-02 | 1.41E-02 | 4.18E-01 |
| 314743                             | k__Bacteria;p__Firmicutes;c__Clostridia;o__Clostridiales;f__Ruminococcaceae;g__<br>Ruminococcus;s__          | 3.09E-02 | 5.63E-02 | 9.10E-01 |
| 4372612                            | k__Bacteria;p__Bacteroidetes;c__Bacteroidia;o__Bacteroidales;f__Bacteroidace<br>ae;g__Bacteroides;s__        | 3.10E-02 | 1.34E+00 | 2.84E-01 |
| 180289                             | k__Bacteria;p__Firmicutes;c__Clostridia;o__Clostridiales;f__Lachnospiraceae;g__<br>;s__                      | 3.10E-02 | 5.21E-01 | 4.48E-02 |
| New.CleanUp.Referen<br>ceOTU67309  | k__Bacteria;p__Firmicutes;c__Clostridia;o__Clostridiales;f__Ruminococcaceae;g__<br>;s__                      | 3.11E-02 | 5.63E-02 | 2.84E-01 |
| New.CleanUp.Referen<br>ceOTU156092 | k__Bacteria;p__Firmicutes;c__Clostridia;o__Clostridiales;f__Dehalobacteriaceae<br>;g__Dehalobacterium;s__    | 3.11E-02 | 5.63E-02 | 2.84E-01 |
| 349546                             | k__Bacteria;p__Firmicutes;c__Clostridia;o__Clostridiales;f__Lachnospiraceae;g__<br>;s__                      | 3.11E-02 | 1.27E-01 | 5.37E-01 |
| New.CleanUp.Referen<br>ceOTU80085  | k__Bacteria;p__Spirochaetes;c__Spirochaetes;o__Spirochaetales;f__Spirochaet<br>aceae;g__Treponema;s__        | 3.11E-02 | 1.41E-02 | 2.24E-01 |
| 568828                             | k__Bacteria;p__Firmicutes;c__Clostridia;o__Clostridiales;f__Lachnospiraceae;g__<br>;s__                      | 3.11E-02 | 2.82E-02 | 2.84E-01 |
| 328724                             | k__Bacteria;p__Firmicutes;c__Clostridia;o__Clostridiales;f__g__s__                                           | 3.11E-02 | 1.41E-02 | 4.18E-01 |
| New.CleanUp.Referen<br>ceOTU169319 | k__Bacteria;p__Firmicutes;c__Clostridia;o__Clostridiales;f__Clostridiaceae;g__C<br>lostridium;s__            | 3.11E-02 | 1.41E-02 | 3.88E-01 |
| 310662                             | k__Bacteria;p__Firmicutes;c__Clostridia;o__Clostridiales;f__g__s__                                           | 3.14E-02 | 1.41E-02 | 2.09E-01 |
| 329746                             | k__Bacteria;p__Firmicutes;c__Clostridia;o__Clostridiales;f__Lachnospiraceae;g__<br>;s__                      | 3.14E-02 | 1.41E-02 | 2.54E-01 |
| New.CleanUp.Referen<br>ceOTU171161 | k__Bacteria;p__Firmicutes;c__Clostridia;o__Clostridiales;f__Ruminococcaceae;g__<br>;s__                      | 3.14E-02 | 1.41E-02 | 2.24E-01 |
| New.CleanUp.Referen<br>ceOTU173567 | k__Bacteria;p__Firmicutes;c__Clostridia;o__Clostridiales;f__Ruminococcaceae;g__<br>Ruminococcus;s__          | 3.14E-02 | 1.41E-02 | 2.24E-01 |
| New.CleanUp.Referen<br>ceOTU78356  | k__Bacteria;p__Firmicutes;c__Clostridia;o__Clostridiales;f__Ruminococcaceae;g__<br>;s__                      | 3.14E-02 | 1.41E-02 | 3.13E-01 |
| New.CleanUp.Referen<br>ceOTU123963 | k__Bacteria;p__Firmicutes;c__Clostridia;o__Clostridiales;f__Ruminococcaceae;g__<br>Oscillospira;s__          | 3.17E-02 | 1.41E-02 | 1.94E-01 |
| 291248                             | k__Bacteria;p__Firmicutes;c__Clostridia;o__Clostridiales;f__Ruminococcaceae;g__<br>;s__                      | 3.17E-02 | 1.41E-02 | 2.24E-01 |

|                                |                                                                                                                    |          |          |          |
|--------------------------------|--------------------------------------------------------------------------------------------------------------------|----------|----------|----------|
| 177230                         | k__Bacteria;p__Firmicutes;c__Clostridia;o__Clostridiales;f__Lachnospiraceae;g__s__                                 | 3.18E-02 | 4.23E-01 | 4.48E-02 |
| 291360                         | k__Bacteria;p__Firmicutes;c__Clostridia;o__Clostridiales;f__Ruminococcaceae;g__Ruminococcus;s__                    | 3.21E-02 | 4.23E-02 | 7.91E-01 |
| New.CleanUp.ReferenceOTU27001  | k__Bacteria;p__Firmicutes;c__Clostridia;o__Clostridiales;f__Lachnospiraceae;g__Moryella;s__                        | 3.22E-02 | 3.10E-01 | 6.12E-01 |
| 296790                         | k__Bacteria;p__Firmicutes;c__Clostridia;o__Clostridiales;f__Lachnospiraceae;g__s__                                 | 3.22E-02 | 5.63E-02 | 2.54E-01 |
| New.CleanUp.ReferenceOTU29715  | k__Bacteria;p__Firmicutes;c__Clostridia;o__Clostridiales;f__Ruminococcaceae;g__s__                                 | 3.22E-02 | 5.63E-02 | 2.54E-01 |
| New.CleanUp.ReferenceOTU157482 | k__Bacteria;p__Firmicutes;c__Clostridia;o__Clostridiales;f__Ruminococcaceae;g__Oscillospira;s__                    | 3.24E-02 | 1.14E+00 | 3.73E-01 |
| New.ReferenceOTU967            | k__Bacteria;p__Firmicutes;c__Clostridia;o__Clostridiales;f__Ruminococcaceae;g__s__                                 | 3.25E-02 | 1.93E+00 | 3.63E+00 |
| New.CleanUp.ReferenceOTU169024 | k__Bacteria;p__Firmicutes;c__Clostridia;o__Clostridiales;f__Ruminococcaceae;g__s__                                 | 3.25E-02 | 3.94E-01 | 1.49E-02 |
| 2774254                        | k__Bacteria;p__Firmicutes;c__Clostridia;o__Clostridiales;f__Lachnospiraceae;g__s__                                 | 3.26E-02 | 1.39E+00 | 3.13E-01 |
| 294791                         | k__Bacteria;p__Firmicutes;c__Clostridia;o__Clostridiales;f__Lachnospiraceae;g__Coprococcus;s__                     | 3.29E-02 | 1.42E+00 | 1.49E-02 |
| 270448                         | k__Bacteria;p__Firmicutes;c__Clostridia;o__Clostridiales                                                           | 3.29E-02 | 4.93E-01 | 1.49E-02 |
| 15431                          | k__Bacteria;p__Firmicutes;c__Bacilli;o__Lactobacillales;f__Streptococcaceae;g__Streptococcus;s__                   | 3.29E-02 | 4.08E-01 | 7.46E-02 |
| New.CleanUp.ReferenceOTU110064 | k__Bacteria;p__Firmicutes;c__Clostridia;o__Clostridiales;f__Ruminococcaceae;g__s__                                 | 3.29E-02 | 7.04E-02 | 2.54E-01 |
| 342110                         | k__Bacteria;p__Firmicutes;c__Clostridia;o__Clostridiales;f__Lachnospiraceae;g__Dorea;s__                           | 3.29E-02 | 8.45E-01 | 7.46E-02 |
| New.CleanUp.ReferenceOTU66811  | k__Bacteria;p__Bacteroidetes;c__Bacteroidia;o__Bacteroidales;f__g__s__                                             | 3.29E-02 | 2.11E-01 | 8.51E-01 |
| New.ReferenceOTU358            | k__Bacteria;p__Verrucomicrobia;c__Verruco-5;o__WCHB1-41;f__RFP12;g__s__                                            | 3.31E-02 | 4.23E-02 | 2.99E-01 |
| New.ReferenceOTU983            | k__Bacteria;p__Firmicutes;c__Clostridia;o__Clostridiales;f__Lachnospiraceae;g__Coprococcus;s__                     | 3.32E-02 | 3.24E-01 | 1.49E-02 |
| New.CleanUp.ReferenceOTU11071  | k__Bacteria;p__Verrucomicrobia;c__Verrucomicrobiae;o__Verrucomicrobiales;f__Verrucomicrobiaceae;g__Akkermansia;s__ | 3.32E-02 | 1.13E-01 | 4.93E-01 |
| New.ReferenceOTU78             | k__Bacteria;p__Verrucomicrobia;c__Verrucomicrobiae;o__Verrucomicrobiales;f__Verrucomicrobiaceae;g__Akkermansia;s__ | 3.33E-02 | 1.27E-01 | 5.22E-01 |
| 287924                         | k__Bacteria;p__Firmicutes;c__Clostridia;o__Clostridiales;f__Lachnospiraceae;g__s__                                 | 3.34E-02 | 7.46E-01 | 8.96E-02 |
| 26608                          | k__Bacteria;p__Firmicutes;c__Bacilli;o__Lactobacillales;f__Lactobacillaceae;g__Lactobacillus;s__                   | 3.34E-02 | 4.79E-01 | 7.46E-02 |
| 4470260                        | k__Bacteria;p__Firmicutes;c__Bacilli;o__Bacillales;f__Bacillaceae;g__Bacillus;s__                                  | 3.35E-02 | 3.24E-01 | 1.49E-02 |
| 193709                         | k__Bacteria;p__Firmicutes;c__Clostridia;o__Clostridiales;f__Ruminococcaceae;g__s__                                 | 3.35E-02 | 3.52E-01 | 4.48E-02 |
| 4308793                        | k__Bacteria;p__Fusobacteria;c__Fusobacteriia;o__Fusobacteriales;f__Fusobacteriaceae;g__Fusobacterium;s__           | 3.37E-02 | 5.92E-01 | 2.15E+00 |
| 73371                          | k__Bacteria;p__Firmicutes;c__Clostridia;o__Clostridiales;f__Lachnospiraceae;g__s__                                 | 3.37E-02 | 1.28E+00 | 2.63E+00 |
| 3528445                        | k__Archaea;p__Euryarchaeota;c__Methanobacteria;o__Methanobacteriales;f__Methanobacteriaceae;g__Methanospaera;s__   | 3.38E-02 | 9.30E-01 | 1.96E+00 |
| 526963                         | k__Bacteria;p__Firmicutes;c__Clostridia;o__Clostridiales;f__g__s__                                                 | 3.40E-02 | 3.66E-01 | 1.00E+00 |
| 291823                         | k__Bacteria;p__Firmicutes;c__Clostridia;o__Clostridiales;f__Lachnospiraceae;g__s__                                 | 3.40E-02 | 4.37E-01 | 1.57E+00 |
| New.ReferenceOTU801            | k__Bacteria;p__Firmicutes;c__Clostridia;o__Clostridiales;f__Ruminococcaceae;g__s__                                 | 3.40E-02 | 4.08E-01 | 2.99E-02 |
| 190772                         | k__Bacteria;p__Firmicutes;c__Clostridia;o__Clostridiales;f__Lachnospiraceae;g__Dorea;s__                           | 3.42E-02 | 2.11E-01 | 1.49E-02 |
| 564400                         | k__Bacteria;p__Firmicutes;c__Clostridia;o__Clostridiales                                                           | 3.42E-02 | 2.11E-01 | 1.49E-02 |
| New.CleanUp.ReferenceOTU7639   | k__Bacteria;p__Spirochaetes;c__Spirochaetes;o__Spirochaetales;f__Spirochaetaceae;g__Treponema;s__                  | 3.43E-02 | 8.45E-02 | 3.13E-01 |

|                                |                                                                                                   |          |          |          |
|--------------------------------|---------------------------------------------------------------------------------------------------|----------|----------|----------|
| 339336                         | k_Bacteria;p_Firmicutes;c_Clostridia;o_Clostridiales;f_g_s                                        | 3.44E-02 | 2.14E+00 | 4.67E+00 |
| New.CleanUp.ReferenceOTU180893 | k_Bacteria;p_Firmicutes;c_Clostridia;o_Clostridiales;f_g_s                                        | 3.44E-02 | 2.96E-01 | 4.48E-02 |
| 4415390                        | k_Bacteria;p_Firmicutes;c_Clostridia;o_Clostridiales;f_Lachnospiraceae;g_s                        | 3.45E-02 | 1.00E+00 | 1.49E-02 |
| New.CleanUp.ReferenceOTU21081  | k_Bacteria;p_Bacteroidetes;c_Bacteroidia;o_Bacteroidales;f_Porphyromonadaceae;g_Parabacteroides;s | 3.45E-02 | 2.68E-01 | 1.49E-02 |
| 4467447                        | k_Bacteria;p_Bacteroidetes;c_Bacteroidia;o_Bacteroidales;f_Bacteroidaceae;g_Bacteroides;s         | 3.47E-02 | 4.51E-01 | 2.99E-02 |
| New.CleanUp.ReferenceOTU67812  | k_Bacteria;p_Firmicutes;c_Clostridia;o_Clostridiales;f_g_s                                        | 3.47E-02 | 3.80E-01 | 2.99E-02 |
| 297180                         | k_Bacteria;p_Firmicutes;c_Clostridia;o_Clostridiales;f_g_s                                        | 3.48E-02 | 1.69E-01 | 5.67E-01 |
| New.CleanUp.ReferenceOTU43007  | k_Bacteria;p_Firmicutes;c_Clostridia;o_Clostridiales;f_Lachnospiraceae;g_Blautia;s                | 3.48E-02 | 1.83E-01 | 1.49E-02 |
| New.CleanUp.ReferenceOTU94576  | Unassigned                                                                                        | 3.48E-02 | 2.11E-01 | 1.49E-02 |
| 184864                         | k_Bacteria;p_Firmicutes;c_Clostridia;o_Clostridiales;f_g_s                                        | 3.49E-02 | 3.18E+00 | 6.57E-01 |
| 4412540                        | k_Bacteria;p_Firmicutes;c_Clostridia;o_Clostridiales;f_Ruminococcaceae;g_s                        | 3.50E-02 | 1.80E+00 | 1.34E-01 |
| New.CleanUp.ReferenceOTU35016  | k_Bacteria;p_Firmicutes;c_Clostridia;o_Clostridiales;f_Lachnospiraceae;g_Dorea;s                  | 3.51E-02 | 1.69E-01 | 1.49E-02 |
| 340711                         | k_Bacteria;p_Firmicutes;c_Clostridia;o_Clostridiales;f_Ruminococcaceae;g_s                        | 3.53E-02 | 2.96E-01 | 2.99E-02 |
| 329402                         | k_Bacteria;p_Firmicutes;c_Bacilli;o_Lactobacillales;f_Lactobacillaceae;g_Lactobacillus;s_reuteri  | 3.53E-02 | 2.68E-01 | 2.99E-02 |
| New.CleanUp.ReferenceOTU55926  | k_Bacteria;p_Firmicutes;c_Clostridia;o_Clostridiales;f_Lachnospiraceae;g_Dorea;s                  | 3.53E-02 | 2.68E-01 | 2.99E-02 |
| 322049                         | k_Bacteria;p_Bacteroidetes;c_Bacteroidia;o_Bacteroidales;f_Prevotellaceae;g_Prevotella;s          | 3.55E-02 | 5.63E-02 | 1.04E+00 |
| 522138                         | k_Bacteria;p_Firmicutes;c_Clostridia;o_Clostridiales;f_g_s                                        | 3.56E-02 | 7.04E-02 | 2.84E-01 |
| 294709                         | k_Bacteria;p_Firmicutes;c_Clostridia;o_Clostridiales;f_Lachnospiraceae;g_Coprococcus;s            | 3.58E-02 | 1.69E-01 | 6.57E-01 |
| New.ReferenceOTU692            | k_Bacteria;p_Firmicutes;c_Clostridia;o_Clostridiales;f_g_s                                        | 3.58E-02 | 2.96E-01 | 9.40E-01 |
| 175922                         | k_Bacteria;p_Firmicutes;c_Clostridia;o_Clostridiales;f_Ruminococcaceae;g_Oscillospira;s           | 3.60E-02 | 2.96E-01 | 2.99E-02 |
| New.CleanUp.ReferenceOTU124018 | k_Bacteria;p_Firmicutes;c_Clostridia;o_Clostridiales;f_Veillonellaceae;g_Anaerovibrio;s           | 3.60E-02 | 1.55E+00 | 2.99E-02 |
| 560491                         | k_Bacteria;p_Firmicutes;c_Clostridia;o_Clostridiales;f_Ruminococcaceae;g_s                        | 3.61E-02 | 2.87E+00 | 7.01E-01 |
| 174288                         | k_Bacteria;p_Firmicutes;c_Clostridia;o_Clostridiales                                              | 3.62E-02 | 2.39E-01 | 4.48E-02 |
| New.ReferenceOTU218            | k_Bacteria;p_Firmicutes;c_Clostridia;o_Clostridiales;f_g_s                                        | 3.64E-02 | 6.20E-01 | 1.13E+00 |
| 4460786                        | k_Bacteria;p_Firmicutes;c_Clostridia;o_Clostridiales;f_g_s                                        | 3.69E-02 | 4.23E-01 | 2.99E-02 |
| 3359884                        | k_Bacteria;p_Cyanobacteria;c_Chloroplast;o_Streptophyta;f_g_s                                     | 3.70E-02 | 9.86E-02 | 3.13E-01 |
| New.ReferenceOTU333            | k_Bacteria;p_Bacteroidetes;c_Bacteroidia;o_Bacteroidales;f_g_s                                    | 3.71E-02 | 5.17E+00 | 6.82E+00 |
| New.CleanUp.ReferenceOTU83921  | k_Bacteria;p_Firmicutes;c_Clostridia;o_Clostridiales;f_Ruminococcaceae;g_s                        | 3.71E-02 | 4.23E-02 | 1.79E-01 |
| New.CleanUp.ReferenceOTU29299  | k_Bacteria;p_Verrucomicrobia;c_Verruco-5;o_WCHB1-41;f_RFP12;g_s                                   | 3.79E-02 | 7.04E-02 | 4.63E-01 |
| New.ReferenceOTU214            | k_Bacteria;p_Firmicutes;c_Clostridia;o_Clostridiales;f_Lachnospiraceae;g_Coprococcus;s            | 3.79E-02 | 1.44E+01 | 1.14E+01 |
| 1043378                        | k_Bacteria;p_Firmicutes;c_Clostridia;o_Clostridiales;f_Ruminococcaceae;g_s                        | 3.80E-02 | 5.45E+01 | 3.57E+01 |
| New.CleanUp.ReferenceOTU85878  | k_Bacteria;p_Firmicutes;c_Clostridia;o_Clostridiales;f_g_s                                        | 3.81E-02 | 1.13E-01 | 6.27E-01 |



|                                |                                                                                                                     |          |          |          |
|--------------------------------|---------------------------------------------------------------------------------------------------------------------|----------|----------|----------|
| 292802                         | k__Bacteria;p__Firmicutes;c__Clostridia;o__Clostridiales;f__Ruminococcaceae;g__s__                                  | 3.90E-02 | 8.45E-02 | 4.78E-01 |
| 181871                         | k__Bacteria;p__Firmicutes;c__Clostridia;o__Clostridiales;f__Lachnospiraceae;g__Dorea;s__                            | 3.93E-02 | 3.10E-01 | 5.97E-02 |
| New.ReferenceOTU202            | k__Bacteria;p__Bacteroidetes;c__Bacteroidia;o__Bacteroidales;f__[Paraprevotellaceae];g__[Prevotella];s__            | 3.95E-02 | 1.41E-01 | 2.34E+00 |
| 334797                         | k__Bacteria;p__Firmicutes;c__Clostridia;o__Clostridiales;f__Ruminococcaceae;g__Oscillospira;s__                     | 3.96E-02 | 6.62E-01 | 2.39E-01 |
| 2835813                        | k__Bacteria;p__Firmicutes;c__Clostridia;o__Clostridiales;f__Ruminococcaceae;g__s__                                  | 3.96E-02 | 5.35E-01 | 8.96E-02 |
| 510094                         | k__Bacteria;p__Firmicutes;c__Clostridia;o__Clostridiales;f__[Mogibacteriaceae];g__Mogibacterium;s__                 | 3.96E-02 | 9.86E-02 | 4.18E-01 |
| 3841096                        | k__Bacteria;p__Firmicutes;c__Clostridia;o__Clostridiales;f__Ruminococcaceae;g__Oscillospira;s__                     | 3.96E-02 | 4.72E+00 | 3.58E-01 |
| 580305                         | k__Bacteria;p__Firmicutes;c__Clostridia;o__Clostridiales;f__Ruminococcaceae;g__s__                                  | 3.96E-02 | 8.31E-01 | 1.94E-01 |
| 308081                         | k__Bacteria;p__Fusobacteria;c__Fusobacteriia;o__Fusobacteriales;f__Fusobacteriaceae;g__Fusobacterium;s__            | 3.96E-02 | 5.07E-01 | 1.49E-01 |
| New.CleanUp.ReferenceOTU89663  | k__Bacteria;p__Firmicutes;c__Clostridia;o__Clostridiales                                                            | 3.98E-02 | 3.80E-01 | 7.46E-02 |
| New.CleanUp.ReferenceOTU107869 | k__Bacteria;p__Bacteroidetes;c__Bacteroidia;o__Bacteroidales;f__Bacteroidaceae;g__Bacteroides;s__                   | 4.02E-02 | 2.54E-01 | 4.48E-02 |
| 4437814                        | k__Bacteria;p__Bacteroidetes;c__Bacteroidia;o__Bacteroidales;f__Bacteroidaceae;g__Bacteroides;s__                   | 4.02E-02 | 2.54E-01 | 4.48E-02 |
| New.ReferenceOTU593            | k__Bacteria;p__Firmicutes;c__Clostridia;o__Clostridiales;f__Lachnospiraceae;g__s__                                  | 4.03E-02 | 4.79E-01 | 1.19E-01 |
| New.CleanUp.ReferenceOTU12239  | k__Bacteria;p__Firmicutes;c__Clostridia;o__Clostridiales;f__Ruminococcaceae;g__s__                                  | 4.03E-02 | 4.23E-02 | 6.12E-01 |
| New.CleanUp.ReferenceOTU19362  | k__Bacteria;p__Bacteroidetes;c__Bacteroidia;o__Bacteroidales;f__Bacteroidaceae;g__Bacteroides;s__                   | 4.03E-02 | 3.10E-01 | 5.97E-02 |
| 293112                         | k__Bacteria;p__Bacteroidetes;c__Bacteroidia;o__Bacteroidales;f__g__s__                                              | 4.06E-02 | 6.62E-01 | 1.79E+00 |
| 179989                         | k__Bacteria;p__Firmicutes;c__Clostridia;o__Clostridiales;f__Lachnospiraceae;g__Blautia;s__                          | 4.07E-02 | 3.80E-01 | 1.10E+00 |
| 125624                         | k__Bacteria;p__Firmicutes;c__Clostridia;o__Clostridiales;f__Lachnospiraceae                                         | 4.08E-02 | 1.06E+00 | 2.99E-01 |
| 578016                         | k__Bacteria;p__Bacteroidetes;c__Bacteroidia;o__Bacteroidales;f__Porphyromonadaceae;g__Parabacteroides;s__distasonis | 4.09E-02 | 1.14E+00 | 1.49E-01 |
| 1602805                        | k__Bacteria;p__Firmicutes;c__Clostridia;o__Clostridiales;f__Lachnospiraceae;g__s__                                  | 4.09E-02 | 1.83E-01 | 1.49E-01 |
| New.ReferenceOTU888            | k__Bacteria;p__Firmicutes;c__Clostridia;o__Clostridiales;f__Ruminococcaceae;g__s__                                  | 4.14E-02 | 4.08E-01 | 8.36E-01 |
| 269386                         | k__Bacteria;p__Cyanobacteria;c__4C0d-2;o__YS2;f__g__s__                                                             | 4.17E-02 | 1.13E+00 | 1.18E+00 |
| 539735                         | k__Bacteria;p__Actinobacteria;c__Actinobacteria;o__Actinomycetales;f__Dietziaceae;g__Dietzia;s__                    | 4.18E-02 | 4.23E-01 | 5.97E-02 |
| 4314126                        | k__Bacteria;p__Firmicutes;c__Clostridia;o__Clostridiales;f__Ruminococcaceae;g__s__                                  | 4.25E-02 | 7.04E-02 | 5.22E-01 |
| 588065                         | k__Bacteria;p__Firmicutes;c__Clostridia;o__Clostridiales;f__Ruminococcaceae;g__s__                                  | 4.27E-02 | 1.69E-01 | 6.12E-01 |
| 3855886                        | k__Bacteria;p__Firmicutes;c__Clostridia;o__Clostridiales;f__Lachnospiraceae;g__Roseburia;s__                        | 4.30E-02 | 5.21E-01 | 4.18E-01 |
| 349971                         | k__Bacteria;p__Firmicutes;c__Clostridia;o__Clostridiales;f__Lachnospiraceae;g__s__                                  | 4.31E-02 | 6.62E-01 | 1.30E+00 |
| 672442                         | k__Bacteria;p__Firmicutes;c__Clostridia;o__Clostridiales;f__Ruminococcaceae;g__Ruminococcus;s__                     | 4.32E-02 | 1.13E-01 | 6.42E-01 |
| New.CleanUp.ReferenceOTU101660 | k__Bacteria;p__Firmicutes;c__Clostridia;o__Clostridiales;f__Ruminococcaceae;g__s__                                  | 4.33E-02 | 1.55E-01 | 5.82E-01 |
| 4390319                        | k__Bacteria;p__Bacteroidetes;c__Bacteroidia;o__Bacteroidales;f__Bacteroidaceae;g__Bacteroides;s__ovatus             | 4.35E-02 | 3.38E-01 | 1.34E-01 |
| New.ReferenceOTU58             | k__Bacteria;p__Bacteroidetes;c__Bacteroidia;o__Bacteroidales;f__g__s__                                              | 4.36E-02 | 9.52E+00 | 6.55E+00 |
| 4300206                        | k__Bacteria;p__Firmicutes;c__Bacilli;o__Lactobacillales;f__Lactobacillaceae;g__Lactobacillus;s__                    | 4.40E-02 | 1.45E+00 | 6.57E-01 |

|                                |                                                                                                                               |          |          |          |
|--------------------------------|-------------------------------------------------------------------------------------------------------------------------------|----------|----------|----------|
| 326645                         | k__Bacteria;p__Firmicutes;c__Clostridia;o__Clostridiales;f__Ruminococcaceae;g__s__                                            | 4.42E-02 | 2.54E+00 | 5.52E-01 |
| New.ReferenceOTU371            | k__Bacteria;p__Firmicutes;c__Clostridia;o__Clostridiales;f__Clostridiaceae;g__Sarcina;s__                                     | 4.42E-02 | 1.97E-01 | 5.52E-01 |
| 2901965                        | k__Bacteria;p__Firmicutes;c__Bacilli;o__Lactobacillales;f__Streptococcaceae;g__Streptococcus;s__                              | 4.42E-02 | 8.45E-01 | 8.96E-02 |
| New.ReferenceOTU274            | k__Bacteria;p__Firmicutes;c__Clostridia;o__Clostridiales;f__Ruminococcaceae;g__s__                                            | 4.42E-02 | 2.82E-01 | 9.10E-01 |
| New.CleanUp.ReferenceOTU13024  | k__Bacteria;p__Firmicutes;c__Clostridia;o__Clostridiales;f__Clostridiaceae;g__Clostridium;s__                                 | 4.42E-02 | 1.27E-01 | 0.00E+00 |
| 4133460                        | k__Bacteria;p__Firmicutes;c__Clostridia;o__Clostridiales;f__g__s__                                                            | 4.42E-02 | 1.55E-01 | 0.00E+00 |
| 325295                         | k__Bacteria;p__Firmicutes;c__Clostridia;o__Clostridiales;f__Lachnospiraceae;g__Blautia;s__producta                            | 4.42E-02 | 1.41E-01 | 0.00E+00 |
| 198530                         | k__Bacteria;p__Bacteroidetes;c__Bacteroidia;o__Bacteroidales;f__Bacteroidaceae;g__Bacteroides                                 | 4.42E-02 | 1.69E-01 | 0.00E+00 |
| 145856                         | k__Bacteria;p__Firmicutes;c__Clostridia;o__Clostridiales;f__[Mogibacteriaceae];g__s__                                         | 4.42E-02 | 4.65E-01 | 0.00E+00 |
| 128227                         | k__Bacteria;p__Firmicutes;c__Bacilli;o__Lactobacillales;f__Lactobacillaceae;g__Lactobacillus;s__                              | 4.42E-02 | 1.41E-01 | 0.00E+00 |
| 4430499                        | k__Bacteria;p__Firmicutes;c__Clostridia;o__Clostridiales;f__Ruminococcaceae;g__s__                                            | 4.42E-02 | 1.41E-01 | 0.00E+00 |
| New.CleanUp.ReferenceOTU134212 | k__Bacteria;p__Firmicutes;c__Clostridia;o__Clostridiales;f__Ruminococcaceae;g__s__                                            | 4.42E-02 | 1.41E-01 | 0.00E+00 |
| 191779                         | k__Bacteria;p__Firmicutes;c__Clostridia;o__Clostridiales;f__Lachnospiraceae;g__Blautia;s__                                    | 4.42E-02 | 1.55E-01 | 0.00E+00 |
| New.CleanUp.ReferenceOTU168741 | k__Bacteria;p__Firmicutes;c__Clostridia;o__Clostridiales;f__Lachnospiraceae;g__Blautia;s__                                    | 4.42E-02 | 1.55E-01 | 0.00E+00 |
| New.CleanUp.ReferenceOTU179296 | k__Bacteria;p__Bacteroidetes;c__Bacteroidia;o__Bacteroidales;f__[Barnesiellaceae];g__s__                                      | 4.42E-02 | 1.55E-01 | 0.00E+00 |
| 135956                         | k__Bacteria;p__Firmicutes;c__Bacilli;o__Lactobacillales;f__Lactobacillaceae;g__Lactobacillus;s__                              | 4.42E-02 | 3.10E-01 | 0.00E+00 |
| 344259                         | k__Bacteria;p__Firmicutes;c__Clostridia;o__Clostridiales;f__Ruminococcaceae;g__s__                                            | 4.42E-02 | 2.25E-01 | 0.00E+00 |
| New.CleanUp.ReferenceOTU64518  | k__Bacteria;p__Bacteroidetes;c__Bacteroidia;o__Bacteroidales;f__Bacteroidaceae;g__Bacteroides;s__uniformis                    | 4.42E-02 | 2.25E-01 | 0.00E+00 |
| New.CleanUp.ReferenceOTU130445 | k__Bacteria;p__Spirochaetes;c__Spirochaetes;o__Spirochaetales;f__Spirochaetaceae;g__Treponema;s__                             | 4.42E-02 | 2.25E-01 | 0.00E+00 |
| 4425280                        | k__Bacteria;p__Tenericutes;c__Mollicutes;o__RF39;f__g__s__                                                                    | 4.42E-02 | 1.69E-01 | 0.00E+00 |
| New.CleanUp.ReferenceOTU6101   | k__Bacteria;p__Firmicutes;c__Clostridia;o__Clostridiales;f__Ruminococcaceae;g__s__                                            | 4.42E-02 | 1.69E-01 | 0.00E+00 |
| New.CleanUp.ReferenceOTU6492   | k__Bacteria;p__Firmicutes;c__Clostridia;o__Clostridiales;f__Lachnospiraceae;g__[Ruminococcus];s__gnavus                       | 4.42E-02 | 2.11E-01 | 0.00E+00 |
| New.CleanUp.ReferenceOTU40900  | k__Bacteria;p__Firmicutes;c__Clostridia;o__Clostridiales;f__Lachnospiraceae;g__s__                                            | 4.42E-02 | 1.69E-01 | 0.00E+00 |
| New.CleanUp.ReferenceOTU99751  | k__Bacteria;p__Firmicutes;c__Clostridia;o__Clostridiales;f__Ruminococcaceae;g__s__                                            | 4.42E-02 | 1.69E-01 | 0.00E+00 |
| New.CleanUp.ReferenceOTU153610 | k__Bacteria;p__Firmicutes;c__Clostridia;o__Clostridiales                                                                      | 4.42E-02 | 1.69E-01 | 0.00E+00 |
| 4415649                        | k__Bacteria;p__Firmicutes;c__Clostridia;o__Clostridiales;f__Lachnospiraceae                                                   | 4.42E-02 | 1.97E-01 | 0.00E+00 |
| 181589                         | k__Bacteria;p__Firmicutes;c__Bacilli;o__Bacillales                                                                            | 4.42E-02 | 3.10E-01 | 0.00E+00 |
| 997267                         | k__Bacteria;p__Firmicutes;c__Clostridia;o__Clostridiales;f__Ruminococcaceae;g__s__                                            | 4.42E-02 | 1.97E-01 | 0.00E+00 |
| New.CleanUp.ReferenceOTU124558 | k__Bacteria;p__Verrucomicrobia;c__Verrucomicrobiae;o__Verrucomicrobiales;f__Verrucomicrobiaceae;g__Akkermansia;s__muciniphila | 4.42E-02 | 2.54E-01 | 0.00E+00 |
| New.CleanUp.ReferenceOTU134251 | k__Bacteria;p__Firmicutes;c__Clostridia;o__Clostridiales;f__Ruminococcaceae;g__s__                                            | 4.42E-02 | 1.97E-01 | 0.00E+00 |
| 316728                         | k__Bacteria;p__Firmicutes;c__Clostridia;o__Clostridiales;f__g__s__                                                            | 4.42E-02 | 1.69E+00 | 0.00E+00 |
| New.CleanUp.ReferenceOTU41369  | k__Bacteria;p__Firmicutes;c__Bacilli;o__Bacillales;f__Staphylococcaceae;g__Jeo                                                | 4.42E-02 | 3.80E-01 | 0.00E+00 |

|                                |                                                                                                               |          |          |          |
|--------------------------------|---------------------------------------------------------------------------------------------------------------|----------|----------|----------|
| New.CleanUp.ReferenceOTU167178 | k__Bacteria;p__Bacteroidetes;c__Bacteroidia;o__Bacteroidales;f__Bacteroidaceae;g__Bacteroides;s__caccae       | 4.42E-02 | 2.11E-01 | 0.00E+00 |
| New.CleanUp.ReferenceOTU36161  | k__Bacteria;p__Firmicutes;c__Clostridia;o__Clostridiales;f__Lachnospiraceae;g__Anaerostipes;s__               | 4.42E-02 | 1.97E-01 | 0.00E+00 |
| 539688                         | k__Bacteria;p__Firmicutes;c__Clostridia;o__Clostridiales;f__g__s__                                            | 4.42E-02 | 2.96E-01 | 0.00E+00 |
| 188591                         | k__Bacteria;p__Firmicutes;c__Clostridia;o__Clostridiales;f__Lachnospiraceae;g__Dorea;s__                      | 4.42E-02 | 2.39E-01 | 0.00E+00 |
| New.CleanUp.ReferenceOTU102915 | k__Bacteria;p__Firmicutes;c__Clostridia;o__Clostridiales;f__Ruminococcaceae;g__Ruminococcus;s__               | 4.42E-02 | 5.49E-01 | 0.00E+00 |
| 181961                         | k__Bacteria;p__Firmicutes;c__Clostridia;o__Clostridiales;f__Ruminococcaceae;g__Ruminococcus;s__               | 4.42E-02 | 7.18E-01 | 0.00E+00 |
| 143423                         | k__Bacteria;p__Firmicutes;c__Clostridia;o__Clostridiales;f__Ruminococcaceae;g__Oscillospira;s__               | 4.42E-02 | 2.25E-01 | 0.00E+00 |
| 187505                         | k__Bacteria;p__Firmicutes;c__Clostridia;o__Clostridiales;f__Lachnospiraceae                                   | 4.42E-02 | 2.54E-01 | 0.00E+00 |
| New.CleanUp.ReferenceOTU77217  | k__Bacteria;p__Firmicutes;c__Clostridia;o__Clostridiales;f__Lachnospiraceae                                   | 4.42E-02 | 3.80E-01 | 0.00E+00 |
| New.CleanUp.ReferenceOTU72464  | k__Bacteria;p__Bacteroidetes;c__Bacteroidia;o__Bacteroidales;f__g__s__                                        | 4.42E-02 | 1.27E-01 | 4.33E-01 |
| New.ReferenceOTU235            | k__Bacteria;p__Firmicutes;c__Clostridia;o__Clostridiales;f__Lachnospiraceae;g__Coprococcus;s__                | 4.42E-02 | 3.38E-01 | 0.00E+00 |
| New.CleanUp.ReferenceOTU133907 | k__Bacteria;p__Bacteroidetes;c__Bacteroidia;o__Bacteroidales;f__Bacteroidaceae;g__Bacteroides;s__             | 4.43E-02 | 3.38E-01 | 8.96E-02 |
| New.CleanUp.ReferenceOTU128143 | k__Bacteria;p__Bacteroidetes;c__Bacteroidia;o__Bacteroidales;f__[Paraprevotellaceae];g__s__                   | 4.45E-02 | 2.11E-01 | 1.09E+00 |
| 4442699                        | k__Bacteria;p__Firmicutes;c__Clostridia;o__Clostridiales;f__Lachnospiraceae;g__s__                            | 4.46E-02 | 1.13E+00 | 2.69E-01 |
| New.ReferenceOTU545            | k__Bacteria;p__Actinobacteria;c__Coriobacteriia;o__Coriobacteriales;f__Coriobacteriaceae;g__Adlercreutzia;s__ | 4.53E-02 | 4.37E-01 | 1.31E+00 |
| New.CleanUp.ReferenceOTU63830  | k__Bacteria;p__Bacteroidetes;c__Bacteroidia;o__Bacteroidales;f__g__s__                                        | 4.53E-02 | 9.86E-02 | 6.42E-01 |
| 731247                         | k__Bacteria;p__Spirochaetes;c__Spirochaetes;o__Spirochaetales;f__Spirochaetaceae;g__s__                       | 4.53E-02 | 0.00E+00 | 1.19E-01 |
| 337086                         | k__Bacteria;p__Verrucomicrobia;c__Verruco-5;o__WCHB1-41;f__RFP12;g__s__                                       | 4.53E-02 | 0.00E+00 | 1.19E-01 |
| New.CleanUp.ReferenceOTU114817 | k__Bacteria;p__Firmicutes;c__Clostridia;o__Clostridiales;f__Dehalobacteriaceae;g__Dehalobacterium;s__         | 4.53E-02 | 0.00E+00 | 1.19E-01 |
| 569244                         | k__Bacteria;p__Tenericutes;c__Mollicutes;o__RF39;f__g__s__                                                    | 4.53E-02 | 1.83E-01 | 8.66E-01 |
| 805699                         | k__Bacteria;p__Tenericutes;c__Mollicutes;o__RF39;f__g__s__                                                    | 4.53E-02 | 0.00E+00 | 1.49E-01 |
| 331181                         | k__Bacteria;p__Bacteroidetes;c__Bacteroidia;o__Bacteroidales;f__Bacteroidaceae;g__BF311;s__                   | 4.53E-02 | 0.00E+00 | 1.34E-01 |
| 291591                         | k__Bacteria;p__Firmicutes;c__Clostridia;o__Clostridiales;f__Lachnospiraceae;g__s__                            | 4.53E-02 | 0.00E+00 | 1.49E-01 |
| New.CleanUp.ReferenceOTU35170  | k__Bacteria;p__Firmicutes;c__Clostridia;o__Clostridiales;f__Dehalobacteriaceae;g__Dehalobacterium;s__         | 4.53E-02 | 0.00E+00 | 1.34E-01 |
| New.CleanUp.ReferenceOTU41051  | k__Bacteria;p__Firmicutes;c__Clostridia;o__Clostridiales;f__Ruminococcaceae;g__s__                            | 4.53E-02 | 0.00E+00 | 1.34E-01 |
| New.CleanUp.ReferenceOTU165628 | k__Bacteria;p__Firmicutes;c__Clostridia;o__Clostridiales;f__Ruminococcaceae;g__s__                            | 4.53E-02 | 0.00E+00 | 1.34E-01 |
| New.CleanUp.ReferenceOTU168260 | k__Bacteria;p__Spirochaetes;c__Spirochaetes;o__Spirochaetales;f__Spirochaetaceae;g__Treponema;s__             | 4.53E-02 | 0.00E+00 | 1.34E-01 |
| New.CleanUp.ReferenceOTU169041 | k__Bacteria;p__Firmicutes;c__Clostridia;o__Clostridiales;f__Lachnospiraceae                                   | 4.53E-02 | 0.00E+00 | 1.34E-01 |
| New.CleanUp.ReferenceOTU79987  | k__Bacteria;p__Firmicutes;c__Clostridia;o__Clostridiales;f__Clostridiaceae;g__s__                             | 4.53E-02 | 4.65E-01 | 5.97E-02 |
| New.CleanUp.ReferenceOTU130256 | k__Bacteria;p__Firmicutes;c__Bacilli;o__Lactobacillales;f__Streptococcaceae;g__Streptococcus;s__              | 4.53E-02 | 3.52E-01 | 5.97E-02 |
| New.CleanUp.ReferenceOTU123128 | k__Bacteria;p__Firmicutes;c__Clostridia;o__Clostridiales;f__Ruminococcaceae;g__s__                            | 4.53E-02 | 0.00E+00 | 1.49E-01 |
| 4359831                        | k__Bacteria;p__Firmicutes;c__Clostridia;o__Clostridiales;f__g__s__                                            | 4.53E-02 | 0.00E+00 | 1.64E-01 |

|                                |                                                                                                        |          |          |          |
|--------------------------------|--------------------------------------------------------------------------------------------------------|----------|----------|----------|
| 293417                         | k__Bacteria;p__Firmicutes;c__Clostridia;o__Clostridiales;f__g__s__                                     | 4.53E-02 | 0.00E+00 | 2.69E-01 |
| 355309                         | k__Bacteria;p__Bacteroidetes;c__Bacteroidia;o__Bacteroidales;f__g__s__                                 | 4.53E-02 | 0.00E+00 | 7.01E-01 |
| 319544                         | k__Bacteria;p__Firmicutes;c__Clostridia;o__Clostridiales;f__g__s__                                     | 4.53E-02 | 0.00E+00 | 2.24E-01 |
| 296040                         | k__Bacteria;p__Firmicutes;c__Clostridia;o__Clostridiales;f__Ruminococcaceae;g__s__                     | 4.53E-02 | 0.00E+00 | 1.64E-01 |
| New.CleanUp.ReferenceOTU29685  | k__Bacteria;p__Bacteroidetes;c__Bacteroidia;o__Bacteroidales;f__[Paraprevotellaceae];g__CF231;s__      | 4.53E-02 | 0.00E+00 | 3.13E-01 |
| New.CleanUp.ReferenceOTU84233  | k__Bacteria;p__Bacteroidetes;c__Bacteroidia;o__Bacteroidales;f__[Paraprevotellaceae];g__s__            | 4.53E-02 | 0.00E+00 | 1.64E-01 |
| 4481975                        | k__Bacteria;p__Firmicutes;c__Clostridia;o__Clostridiales;f__Lachnospiraceae;g__s__                     | 4.53E-02 | 0.00E+00 | 1.79E-01 |
| New.CleanUp.ReferenceOTU24933  | Unassigned                                                                                             | 4.53E-02 | 0.00E+00 | 2.09E-01 |
| New.CleanUp.ReferenceOTU142829 | k__Bacteria;p__Firmicutes;c__Clostridia;o__Clostridiales;f__Ruminococcaceae;g__s__                     | 4.53E-02 | 0.00E+00 | 1.79E-01 |
| New.ReferenceOTU965            | k__Bacteria;p__Firmicutes;c__Clostridia;o__Clostridiales;f__g__s__                                     | 4.53E-02 | 0.00E+00 | 2.69E-01 |
| 300457                         | k__Bacteria;p__Firmicutes;c__Clostridia;o__Clostridiales;f__Ruminococcaceae;g__Oscillospira;s__        | 4.53E-02 | 0.00E+00 | 2.39E-01 |
| New.CleanUp.ReferenceOTU37972  | k__Bacteria;p__Firmicutes;c__Clostridia;o__Clostridiales;f__g__s__                                     | 4.53E-02 | 0.00E+00 | 2.69E-01 |
| New.CleanUp.ReferenceOTU143005 | k__Bacteria;p__Firmicutes;c__Clostridia;o__Clostridiales;f__[Tissierellaceae];g__Helcococcus;s__       | 4.53E-02 | 0.00E+00 | 6.57E-01 |
| 172081                         | k__Bacteria;p__Firmicutes;c__Clostridia;o__Clostridiales;f__g__s__                                     | 4.53E-02 | 0.00E+00 | 2.84E-01 |
| New.CleanUp.ReferenceOTU103833 | k__Bacteria;p__Firmicutes;c__Clostridia;o__Clostridiales;f__g__s__                                     | 4.53E-02 | 0.00E+00 | 2.54E-01 |
| New.CleanUp.ReferenceOTU290    | k__Bacteria;p__Firmicutes;c__Clostridia;o__Clostridiales;f__[Mogibacteriaceae];g__s__                  | 4.53E-02 | 4.23E-02 | 2.39E-01 |
| 3807411                        | k__Bacteria;p__Firmicutes;c__Clostridia;o__Clostridiales;f__Ruminococcaceae;g__s__                     | 4.57E-02 | 6.62E-01 | 7.46E-02 |
| 4345515                        | k__Bacteria;p__Firmicutes;c__Clostridia;o__Clostridiales;f__Ruminococcaceae;g__s__                     | 4.57E-02 | 8.69E+00 | 1.25E+01 |
| 291202                         | k__Bacteria;p__Firmicutes;c__Clostridia;o__Clostridiales;f__Ruminococcaceae;g__s__                     | 4.57E-02 | 1.02E+01 | 3.79E+00 |
| New.CleanUp.ReferenceOTU71646  | k__Bacteria;p__Firmicutes;c__Clostridia;o__Clostridiales;f__Lachnospiraceae;g__s__                     | 4.63E-02 | 3.24E-01 | 7.61E-01 |
| 175836                         | k__Bacteria;p__Firmicutes;c__Clostridia;o__Clostridiales;f__Ruminococcaceae;g__Ruminococcus;s__        | 4.65E-02 | 6.06E-01 | 1.04E-01 |
| 330492                         | k__Bacteria;p__Firmicutes;c__Clostridia;o__Clostridiales;f__[Mogibacteriaceae];g__s__                  | 4.69E-02 | 8.45E-02 | 3.88E-01 |
| New.CleanUp.ReferenceOTU27705  | k__Bacteria;p__Firmicutes;c__Clostridia;o__Clostridiales;f__Ruminococcaceae;g__s__                     | 4.78E-02 | 2.82E-01 | 4.93E-01 |
| New.CleanUp.ReferenceOTU34463  | k__Bacteria;p__Bacteroidetes;c__Bacteroidia;o__Bacteroidales;f__Porphyromonadaceae;g__Paludibacter;s__ | 4.80E-02 | 8.45E-02 | 5.67E-01 |
| 43950                          | k__Bacteria;p__Firmicutes;c__Clostridia;o__Clostridiales;f__Ruminococcaceae;g__Oscillospira;s__        | 4.85E-02 | 4.37E-01 | 1.79E-01 |
| 336149                         | k__Bacteria;p__Firmicutes;c__Clostridia;o__Clostridiales;f__Lachnospiraceae;g__s__                     | 4.85E-02 | 1.69E-01 | 1.07E+00 |
| New.ReferenceOTU909            | k__Bacteria;p__Firmicutes;c__Clostridia;o__Clostridiales;f__Ruminococcaceae;g__Oscillospira;s__        | 4.86E-02 | 1.03E+00 | 2.12E+00 |
| 355909                         | k__Bacteria;p__Firmicutes;c__Clostridia;o__Clostridiales;f__Ruminococcaceae;g__s__                     | 4.86E-02 | 1.13E-01 | 5.22E-01 |
| 346455                         | k__Bacteria;p__Firmicutes;c__Clostridia;o__Clostridiales;f__Lachnospiraceae;g__s__                     | 4.89E-02 | 1.70E+00 | 1.19E-01 |
| New.ReferenceOTU477            | k__Bacteria;p__Firmicutes;c__Clostridia;o__Clostridiales;f__Ruminococcaceae;g__s__                     | 4.90E-02 | 2.82E-02 | 7.16E-01 |
| 518040                         | k__Bacteria;p__Firmicutes;c__Clostridia;o__Clostridiales;f__g__s__                                     | 4.91E-02 | 5.35E-01 | 7.46E-02 |
| 292977                         | k__Bacteria;p__Verrucomicrobia;c__Verruco-5;o__WCHB1-41;f__RFP12;g__s__                                | 4.98E-02 | 2.96E-01 | 7.46E-01 |
