# Supplementary material for: Composition and Diversity of the Fecal Microbiome and Inferred Fecal Metagenome Does Not Predict Subsequent Pneumonia Caused by Rhodococcus equi in Foals
Source: PubMed Central journal article supplement (PMC4549325; doi:10.1371/journal.pone.0136586), 2015-08-25
Supplement: pone.0136586.s003.pdf [file pone.0136586.s003.pdf]

| KO Decreased >2 fold | KO Increased >2 fold |
|----------------------|----------------------|
| K11695               | K07504               |
| K02545               | K00383               |
| K12553               | K01563               |
| K10850               | K00569               |
| K12552               | K03718               |
| K04478               | K09125               |
| K01401               | K09939               |
| K11694               | K03820               |
| K08255               | K00333               |
| K13714               | K09136               |
| K12551               | K06955               |
| K11442               | K07068               |
| K09814               | K03390               |
| K09813               | K01322               |
| K08170               | K09007               |
| K06122               | K07157               |
| K14333               | K01067               |
| K10227               | K00156               |
| K01905               | K00946               |
| K07535               | K09474               |
| K11635               | K02191               |
| K01713               | K00839               |
| K05988               | K01960               |
| K11914               | K13953               |
| K11916               | K00772               |
| K09982               | K10844               |
| K10677               | K09459               |
| K02753               | K05788               |
| K10908               | K03918               |
| K00395               | K04127               |
| K11915               | K07156               |
| K13892               | K03638               |
| K01103               | K02067               |
| K12661               | K05776               |
| K13637               | K07459               |
| K04784               | K07245               |
| K00534               | K03709               |
| K13651               | K12524               |
| K09991               | K03215               |

|        |        |
|--------|--------|
| K10561 | K01485 |
| K07683 | K00903 |
| K06165 | K10985 |
| K10851 | K03787 |
| K00094 | K00428 |
| K06120 | K00441 |
| K01152 | K04568 |
| K06163 | K06015 |
| K05780 | K02427 |
| K06164 | K03113 |
| K05781 | K03795 |
| K05338 | K02763 |
| K05339 | K07081 |
| K10202 | K03775 |
| K10795 | K02303 |
| K10544 | K07008 |
| K05304 | K09005 |
| K03851 | K09797 |
| K10555 | K09798 |
| K00329 | K00038 |
| K10559 | K07739 |
| K06609 | K00510 |
| K07482 | K05838 |
| K03852 | K02639 |
| K10560 | K07051 |
| K05905 | K03179 |
| K10120 | K05884 |
| K06951 | K01434 |
| K07469 | K07494 |
| K03191 | K09011 |
| K03198 | K07123 |
| K00689 | K06869 |
| K13919 | K06992 |
| K08314 | K02666 |
| K10711 | K09122 |
| K00076 | K00641 |
| K10122 | K14054 |
| K05305 | K12141 |
| K13002 | K13015 |
| K10121 | K07442 |
| K00355 | K09126 |

|        |        |
|--------|--------|
| K09384 | K03592 |
| K13020 | K00245 |
| K05352 | K13819 |
| K06330 | K05575 |
| K07396 | K00230 |
| K07248 | K12140 |
| K03309 | K05966 |
| K12583 | K13599 |
| K06418 | K02060 |
| K03332 | K05979 |
| K00863 | K06990 |
| K07705 | K06203 |
| K02102 | K08481 |
| K05297 | K06936 |
| K10556 | K05873 |
| K02750 | K07151 |
| K08717 | K07094 |
| K07257 | K07446 |
| K09960 | K03568 |
| K00918 | K03658 |
| K14591 | K11646 |
| K01002 | K02064 |
| K08965 | K14187 |
| K02786 | K06988 |
| K01535 | K06048 |
| K10545 | K07013 |
| K01210 | K02478 |
| K02771 | K09141 |
| K01501 | K06176 |
| K00803 | K03623 |
| K10796 | K00729 |
| K09703 | K07503 |
| K10793 | K12234 |
| K03779 | K04566 |
| K08676 | K09979 |
| K02509 | K15034 |
| K11534 | K07161 |
| K07709 | K00556 |
| K01220 | K02584 |
| K00883 | K02063 |
| K15036 | K00584 |

|        |        |
|--------|--------|
| K03780 | K11921 |
| K01514 | K09809 |
| K07803 | K02626 |
| K05822 | K01959 |
| K11214 | K09120 |
| K05341 | K04483 |
| K01629 | K14120 |
| K01305 | K13820 |
| K10201 | K14117 |
| K03444 | K03720 |
| K01797 | K03433 |
| K06605 | K14126 |
| K12240 | K03051 |
| K01636 | K00809 |
| K06928 | K06982 |
| K09961 | K07096 |
| K02840 | K04794 |
| K13049 | K10977 |
| K10794 | K02922 |
| K00374 | K02889 |
| K01750 | K02201 |
| K13891 | K09726 |
| K06995 | K06944 |
| K03476 | K08315 |
| K12527 | K14941 |
| K01777 | K13990 |
| K05306 | K03462 |
| K13890 | K06943 |
| K00112 | K03432 |
| K06952 | K07580 |
| K02574 | K00188 |
| K08169 | K14112 |
| K02547 | K14654 |
| K09696 | K03124 |
| K13889 | K03265 |
| K01573 | K04796 |
| K08358 | K02936 |
| K09988 | K07064 |
| K08357 | K12589 |
| K09697 | K02966 |
| K01818 | K09124 |

|        |        |
|--------|--------|
| K01212 | K06862 |
| K12700 | K03041 |
| K02468 | K14118 |
| K07704 | K02323 |
| K09706 | K14111 |
| K02439 | K02322 |
| K00691 | K04798 |
| K00881 | K02869 |
| K01804 | K03627 |
| K00373 | K02883 |
| K03457 | K07744 |
| K00194 | K03047 |
| K06212 | K03058 |
| K06310 | K07060 |
| K01062 | K07728 |
| K06909 | K14124 |
| K01036 | K03238 |
| K01071 | K01728 |
| K12941 | K02929 |
| K03299 | K13525 |
| K09704 | K02685 |
| K09001 | K09717 |
| K12136 | K03232 |
| K01057 | K02991 |
| K07162 | K07991 |
| K07219 | K09724 |
| K07694 | K14128 |
| K02777 | K07569 |
| K08369 | K03050 |
| K00060 | K02984 |
| K06610 | K10747 |
| K03931 | K07108 |
| K07467 | K07499 |
| K02075 | K02921 |
| K06162 | K14097 |
| K07707 | K07558 |
| K13954 | K09735 |
| K00055 | K07055 |
| K01813 | K14127 |
| K00197 | K01592 |
| K01139 | K02908 |

|        |        |
|--------|--------|
| K03833 | K06914 |
| K01487 | K02319 |
| K14977 | K11212 |
| K00135 | K06984 |
| K02103 | K03105 |
| K03480 | K09727 |
| K05845 | K00201 |
| K01608 | K03042 |
| K02074 | K14122 |
| K14138 | K00320 |
| K13922 | K00443 |
| K12992 | K00400 |
| K00302 | K02974 |
| K00034 | K07583 |
| K13678 | K00196 |
| K11104 | K03231 |
| K00633 | K07083 |
| K07160 | K11176 |
| K00675 | K03552 |
| K03336 | K06865 |
| K02083 | K14653 |
| K00086 | K09142 |
| K01051 | K03726 |
|        | K03237 |
|        | K14116 |
|        | K06965 |
|        | K05715 |
|        | K14100 |
|        | K07557 |
|        | K07392 |
|        | K14656 |
|        | K09721 |
|        | K00399 |
|        | K09739 |
|        | K07581 |
|        | K07388 |
|        | K07178 |
|        | K02866 |
|        | K11600 |
|        | K09713 |
|        | K00581 |

|  |        |
|--|--------|
|  | K02927 |
|  | K03421 |
|  | K03243 |
|  | K13942 |
|  | K03422 |
|  | K03167 |
|  | K06174 |
|  | K02924 |
|  | K07579 |
|  | K13812 |
|  | K00555 |
|  | K06875 |
|  | K14115 |
|  | K04802 |
|  | K02875 |
|  | K01622 |
|  | K03234 |
|  | K00578 |
|  | K02978 |
|  | K01499 |
|  | K07142 |
|  | K03236 |
|  | K02912 |
|  | K02930 |
|  | K04800 |
|  | K03264 |
|  | K06863 |
|  | K07158 |
|  | K09728 |
|  | K14102 |
|  | K06874 |
|  | K09119 |
|  | K02877 |
|  | K00580 |
|  | K08979 |
|  | K00672 |
|  | K14119 |
|  | K00402 |
|  | K03056 |
|  | K07463 |
|  | K07103 |

|  |        |
|--|--------|
|  | K07398 |
|  | K04795 |
|  | K03263 |
|  | K06981 |
|  | K02977 |
|  | K02683 |
|  | K06933 |
|  | K07254 |
|  | K00204 |
|  | K14123 |
|  | K04797 |
|  | K14101 |
|  | K01001 |
|  | K07575 |
|  | K03053 |
|  | K03538 |
|  | K14094 |
|  | K08096 |
|  | K09140 |
|  | K07561 |
|  | K03537 |
|  | K06913 |
|  | K09723 |
|  | K00579 |
|  | K01170 |
|  | K02962 |
|  | K00200 |
|  | K02910 |
|  | K03679 |
|  | K07730 |
|  | K07174 |
|  | K08971 |
|  | K00202 |
|  | K03120 |
|  | K07721 |
|  | K07072 |
|  | K04801 |
|  | K10726 |
|  | K07572 |
|  | K03136 |
|  | K03059 |



|  |        |
|--|--------|
|  | K09741 |
|  | K14121 |
|  | K03626 |
|  | K00186 |
|  | K14099 |
|  | K11781 |
|  | K00021 |
|  | K07244 |
|  | K03166 |
|  | K07466 |
|  | K02944 |
|  | K00125 |
|  | K00442 |
|  | K14093 |
|  | K00440 |
|  | K11260 |
|  | K00401 |
|  | K00150 |
|  | K07573 |
|  | K03540 |
|  | K14095 |
|  | K09730 |
|  | K14110 |
|  | K03539 |
|  | K07134 |
|  | K11780 |
|  | K00577 |
|  | K07144 |
|  | K03055 |
|  | K00586 |
|  | K07562 |
|  | K03057 |
|  | K02896 |
|  | K00583 |
|  | K14107 |
|  | K03242 |
|  | K14125 |
|  | K00205 |
|  | K07325 |
|  | K04799 |
|  | K04093 |

|  |        |
|--|--------|
|  | K09720 |
|  | K09722 |
|  | K03725 |
|  | K07135 |
|  | K06961 |
|  | K09738 |
|  | K09154 |
|  | K05716 |
|  | K14104 |
|  | K07342 |
|  | K07159 |
|  | K07065 |
|  | K14098 |
|  | K10896 |
|  | K00187 |
|  | K02987 |
|  | K00203 |
|  | K04484 |
|  | K09733 |
|  | K09482 |
|  | K14113 |
|  | K07732 |
|  | K00319 |
|  | K02995 |
|  | K07041 |
|  | K10725 |
|  | K03044 |
|  | K02885 |
|  | K06983 |
|  | K03420 |
|  | K14096 |
|  | K02915 |
|  | K14109 |
|  | K02979 |
|  | K06932 |
|  | K03330 |
|  | K03045 |
|  | K04035 |
|  | K14092 |
|  | K14114 |
|  | K07585 |

|  |        |
|--|--------|
|  | K03049 |
|  | K07337 |
|  | K14108 |
|  | K06269 |
|  | K00582 |
|  | K14106 |
|  | K14105 |
|  | K03932 |
|  | K14103 |
|  | K09003 |
|  | K08226 |
|  | K07049 |
|  | K01150 |
|  | K13498 |
|  | K01906 |
|  | K05281 |
|  | K06868 |
|  | K06946 |
|  | K07163 |
|  | K09942 |
|  | K00309 |
|  | K01593 |
|  | K01054 |
|  | K07333 |
|  | K13829 |
|  | K01216 |
|  | K09859 |
|  | K09144 |
|  | K09127 |
|  | K09714 |
|  | K07283 |
|  | K09150 |
|  | K11443 |
|  | K09805 |
|  | K02506 |
|  | K08139 |
|  | K09746 |
|  | K13581 |
|  | K13001 |
|  | K05555 |
|  | K07302 |

|  |        |
|--|--------|
|  | K09950 |
|  | K07303 |
|  | K01249 |
|  | K06986 |
|  | K07330 |
|  | K12988 |
|  | K13587 |
|  | K12449 |
|  | K09715 |
|  | K10843 |
|  | K01437 |
|  | K10232 |
|  | K01655 |
|  | K13665 |
|  | K11045 |
|  | K03715 |
|  | K10233 |
|  | K08081 |
|  | K10234 |
|  | K09743 |
|  | K01253 |
|  | K05588 |
|  | K01506 |
|  | K02383 |
|  | K08988 |
|  | K05351 |
|  | K05824 |
|  | K14257 |
|  | K05899 |
|  | K00988 |
|  | K00288 |
|  | K13421 |
|  | K14164 |
|  | K00011 |
|  | K08980 |
|  | K06027 |
|  | K00178 |
